# Supplementary material for: Relative contribution of climate and non-climate drivers in determining dynamic rates of boreal birds at the edge of their range
Source: PLoS One. 2019 Oct 24;14(10):e0224308. doi: 10.1371/journal.pone.0224308 (PMC6812788; doi:10.1371/journal.pone.0224308)
Supplement: S1 File — (XLSX) [file pone.0224308.s001.xlsx]

## Sheet: temp_1m_20190108
id	obs	date_time	tempc	survey_site	obs_point	date	Y_m	month	year	yq
1	1	2015-07-30	13.942	Paul Smith's College VIC	pscvic_1	2015-07-30	2015-07	July	2015	2015.5
2	2	2015-07-30 02:00:00	12.69	Paul Smith's College VIC	pscvic_1	2015-07-30	2015-07	July	2015	2015.5
3	3	2015-07-30 04:00:00	11.625	Paul Smith's College VIC	pscvic_1	2015-07-30	2015-07	July	2015	2015.5
4	4	2015-07-30 06:00:00	11.819	Paul Smith's College VIC	pscvic_1	2015-07-30	2015-07	July	2015	2015.5
5	5	2015-07-30 08:00:00	22.429	Paul Smith's College VIC	pscvic_1	2015-07-30	2015-07	July	2015	2015.5
6	6	2015-07-30 10:00:00	23.004	Paul Smith's College VIC	pscvic_1	2015-07-30	2015-07	July	2015	2015.5
7	7	2015-07-30	21.855	Paul Smith's College VIC	pscvic_1	2015-07-30	2015-07	July	2015	2015.5
8	8	2015-07-30 02:00:00	27.961	Paul Smith's College VIC	pscvic_1	2015-07-30	2015-07	July	2015	2015.5
9	9	2015-07-30 04:00:00	29.552	Paul Smith's College VIC	pscvic_1	2015-07-30	2015-07	July	2015	2015.5
10	10	2015-07-30 06:00:00	26.097	Paul Smith's College VIC	pscvic_1	2015-07-30	2015-07	July	2015	2015.5
11	11	2015-07-30 08:00:00	20.805	Paul Smith's College VIC	pscvic_1	2015-07-30	2015-07	July	2015	2015.5
12	12	2015-07-30 10:00:00	17.284	Paul Smith's College VIC	pscvic_1	2015-07-30	2015-07	July	2015	2015.5
13	13	2015-07-31	16.427	Paul Smith's College VIC	pscvic_1	2015-07-31	2015-07	July	2015	2015.5
14	14	2015-07-31 02:00:00	9.965	Paul Smith's College VIC	pscvic_1	2015-07-31	2015-07	July	2015	2015.5
15	15	2015-07-31 04:00:00	13.75	Paul Smith's College VIC	pscvic_1	2015-07-31	2015-07	July	2015	2015.5
16	16	2015-07-31 06:00:00	15.187	Paul Smith's College VIC	pscvic_1	2015-07-31	2015-07	July	2015	2015.5
17	17	2015-07-31 08:00:00	19.948	Paul Smith's College VIC	pscvic_1	2015-07-31	2015-07	July	2015	2015.5
18	18	2015-07-31 10:00:00	20.615	Paul Smith's College VIC	pscvic_1	2015-07-31	2015-07	July	2015	2015.5
19	19	2015-07-31	26.879	Paul Smith's College VIC	pscvic_1	2015-07-31	2015-07	July	2015	2015.5
20	20	2015-07-31 02:00:00	26.39	Paul Smith's College VIC	pscvic_1	2015-07-31	2015-07	July	2015	2015.5
21	21	2015-07-31 04:00:00	27.764	Paul Smith's College VIC	pscvic_1	2015-07-31	2015-07	July	2015	2015.5
22	22	2015-07-31 06:00:00	26.195	Paul Smith's College VIC	pscvic_1	2015-07-31	2015-07	July	2015	2015.5
23	23	2015-07-31 08:00:00	18.426	Paul Smith's College VIC	pscvic_1	2015-07-31	2015-07	July	2015	2015.5
24	24	2015-07-31 10:00:00	12.11	Paul Smith's College VIC	pscvic_1	2015-07-31	2015-07	July	2015	2015.5
25	25	2015-08-01	15.951	Paul Smith's College VIC	pscvic_1	2015-08-01	2015-08	August	2015	2015.5
26	26	2015-08-01 02:00:00	13.654	Paul Smith's College VIC	pscvic_1	2015-08-01	2015-08	August	2015	2015.5
27	27	2015-08-01 04:00:00	14.996	Paul Smith's College VIC	pscvic_1	2015-08-01	2015-08	August	2015	2015.5
28	28	2015-08-01 06:00:00	14.804	Paul Smith's College VIC	pscvic_1	2015-08-01	2015-08	August	2015	2015.5
29	29	2015-08-01 08:00:00	17.475	Paul Smith's College VIC	pscvic_1	2015-08-01	2015-08	August	2015	2015.5
30	30	2015-08-01 10:00:00	23.484	Paul Smith's College VIC	pscvic_1	2015-08-01	2015-08	August	2015	2015.5
31	31	2015-08-01	26.195	Paul Smith's College VIC	pscvic_1	2015-08-01	2015-08	August	2015	2015.5
32	32	2015-08-01 02:00:00	26.683	Paul Smith's College VIC	pscvic_1	2015-08-01	2015-08	August	2015	2015.5
33	33	2015-08-01 04:00:00	26.488	Paul Smith's College VIC	pscvic_1	2015-08-01	2015-08	August	2015	2015.5
34	34	2015-08-01 06:00:00	20.615	Paul Smith's College VIC	pscvic_1	2015-08-01	2015-08	August	2015	2015.5
35	35	2015-08-01 08:00:00	15.951	Paul Smith's College VIC	pscvic_1	2015-08-01	2015-08	August	2015	2015.5
36	36	2015-08-01 10:00:00	12.98	Paul Smith's College VIC	pscvic_1	2015-08-01	2015-08	August	2015	2015.5
37	37	2015-08-02	10.944	Paul Smith's College VIC	pscvic_1	2015-08-02	2015-08	August	2015	2015.5
38	38	2015-08-02 02:00:00	8.481	Paul Smith's College VIC	pscvic_1	2015-08-02	2015-08	August	2015	2015.5
39	39	2015-08-02 04:00:00	6.268	Paul Smith's College VIC	pscvic_1	2015-08-02	2015-08	August	2015	2015.5
40	40	2015-08-02 06:00:00	5.655	Paul Smith's College VIC	pscvic_1	2015-08-02	2015-08	August	2015	2015.5
41	41	2015-08-02 08:00:00	16.999	Paul Smith's College VIC	pscvic_1	2015-08-02	2015-08	August	2015	2015.5
42	42	2015-08-02 10:00:00	23.004	Paul Smith's College VIC	pscvic_1	2015-08-02	2015-08	August	2015	2015.5
43	43	2015-08-02	28.853	Paul Smith's College VIC	pscvic_1	2015-08-02	2015-08	August	2015	2015.5
44	44	2015-08-02 02:00:00	28.456	Paul Smith's College VIC	pscvic_1	2015-08-02	2015-08	August	2015	2015.5
45	45	2015-08-02 04:00:00	29.152	Paul Smith's College VIC	pscvic_1	2015-08-02	2015-08	August	2015	2015.5
46	46	2015-08-02 06:00:00	26.683	Paul Smith's College VIC	pscvic_1	2015-08-02	2015-08	August	2015	2015.5
47	47	2015-08-02 08:00:00	19.853	Paul Smith's College VIC	pscvic_1	2015-08-02	2015-08	August	2015	2015.5
48	48	2015-08-02 10:00:00	16.903	Paul Smith's College VIC	pscvic_1	2015-08-02	2015-08	August	2015	2015.5
49	49	2015-08-03	13.269	Paul Smith's College VIC	pscvic_1	2015-08-03	2015-08	August	2015	2015.5
50	50	2015-08-03 02:00:00	17.284	Paul Smith's College VIC	pscvic_1	2015-08-03	2015-08	August	2015	2015.5
51	51	2015-08-03 04:00:00	17.475	Paul Smith's College VIC	pscvic_1	2015-08-03	2015-08	August	2015	2015.5
52	52	2015-08-03 06:00:00	17.475	Paul Smith's College VIC	pscvic_1	2015-08-03	2015-08	August	2015	2015.5
53	53	2015-08-03 08:00:00	23.581	Paul Smith's College VIC	pscvic_1	2015-08-03	2015-08	August	2015	2015.5
54	54	2015-08-03 10:00:00	22.429	Paul Smith's College VIC	pscvic_1	2015-08-03	2015-08	August	2015	2015.5
55	55	2015-08-03	27.567	Paul Smith's College VIC	pscvic_1	2015-08-03	2015-08	August	2015	2015.5
56	56	2015-08-03 02:00:00	20.615	Paul Smith's College VIC	pscvic_1	2015-08-03	2015-08	August	2015	2015.5
57	57	2015-08-03 04:00:00	26.292	Paul Smith's College VIC	pscvic_1	2015-08-03	2015-08	August	2015	2015.5
58	58	2015-08-03 06:00:00	23.869	Paul Smith's College VIC	pscvic_1	2015-08-03	2015-08	August	2015	2015.5
59	59	2015-08-03 08:00:00	18.901	Paul Smith's College VIC	pscvic_1	2015-08-03	2015-08	August	2015	2015.5
60	60	2015-08-03 10:00:00	12.304	Paul Smith's College VIC	pscvic_1	2015-08-03	2015-08	August	2015	2015.5
61	61	2015-08-04	9.373	Paul Smith's College VIC	pscvic_1	2015-08-04	2015-08	August	2015	2015.5
62	62	2015-08-04 02:00:00	8.481	Paul Smith's College VIC	pscvic_1	2015-08-04	2015-08	August	2015	2015.5
63	63	2015-08-04 04:00:00	7.179	Paul Smith's College VIC	pscvic_1	2015-08-04	2015-08	August	2015	2015.5
64	64	2015-08-04 06:00:00	13.75	Paul Smith's College VIC	pscvic_1	2015-08-04	2015-08	August	2015	2015.5
65	65	2015-08-04 08:00:00	14.996	Paul Smith's College VIC	pscvic_1	2015-08-04	2015-08	August	2015	2015.5
66	66	2015-08-04 10:00:00	22.908	Paul Smith's College VIC	pscvic_1	2015-08-04	2015-08	August	2015	2015.5
67	67	2015-08-04	25.513	Paul Smith's College VIC	pscvic_1	2015-08-04	2015-08	August	2015	2015.5
68	68	2015-08-04 02:00:00	19.758	Paul Smith's College VIC	pscvic_1	2015-08-04	2015-08	August	2015	2015.5
69	69	2015-08-04 04:00:00	17.189	Paul Smith's College VIC	pscvic_1	2015-08-04	2015-08	August	2015	2015.5
70	70	2015-08-04 06:00:00	20.424	Paul Smith's College VIC	pscvic_1	2015-08-04	2015-08	August	2015	2015.5
71	71	2015-08-04 08:00:00	14.134	Paul Smith's College VIC	pscvic_1	2015-08-04	2015-08	August	2015	2015.5
72	72	2015-08-04 10:00:00	9.176	Paul Smith's College VIC	pscvic_1	2015-08-04	2015-08	August	2015	2015.5
73	73	2015-08-05	11.431	Paul Smith's College VIC	pscvic_1	2015-08-05	2015-08	August	2015	2015.5
74	74	2015-08-05 02:00:00	13.75	Paul Smith's College VIC	pscvic_1	2015-08-05	2015-08	August	2015	2015.5
75	75	2015-08-05 04:00:00	13.558	Paul Smith's College VIC	pscvic_1	2015-08-05	2015-08	August	2015	2015.5
76	76	2015-08-05 06:00:00	13.654	Paul Smith's College VIC	pscvic_1	2015-08-05	2015-08	August	2015	2015.5
77	77	2015-08-05 08:00:00	17.379	Paul Smith's College VIC	pscvic_1	2015-08-05	2015-08	August	2015	2015.5
78	78	2015-08-05 10:00:00	20.424	Paul Smith's College VIC	pscvic_1	2015-08-05	2015-08	August	2015	2015.5
79	79	2015-08-05	21.855	Paul Smith's College VIC	pscvic_1	2015-08-05	2015-08	August	2015	2015.5
80	80	2015-08-05 02:00:00	23.484	Paul Smith's College VIC	pscvic_1	2015-08-05	2015-08	August	2015	2015.5
81	81	2015-08-05 04:00:00	21.378	Paul Smith's College VIC	pscvic_1	2015-08-05	2015-08	August	2015	2015.5
82	82	2015-08-05 06:00:00	19.377	Paul Smith's College VIC	pscvic_1	2015-08-05	2015-08	August	2015	2015.5
83	83	2015-08-05 08:00:00	14.709	Paul Smith's College VIC	pscvic_1	2015-08-05	2015-08	August	2015	2015.5
84	84	2015-08-05 10:00:00	13.076	Paul Smith's College VIC	pscvic_1	2015-08-05	2015-08	August	2015	2015.5
85	85	2015-08-06	13.654	Paul Smith's College VIC	pscvic_1	2015-08-06	2015-08	August	2015	2015.5
86	86	2015-08-06 02:00:00	11.916	Paul Smith's College VIC	pscvic_1	2015-08-06	2015-08	August	2015	2015.5
87	87	2015-08-06 04:00:00	11.236	Paul Smith's College VIC	pscvic_1	2015-08-06	2015-08	August	2015	2015.5
88	88	2015-08-06 06:00:00	12.207	Paul Smith's College VIC	pscvic_1	2015-08-06	2015-08	August	2015	2015.5
89	89	2015-08-06 08:00:00	14.325	Paul Smith's College VIC	pscvic_1	2015-08-06	2015-08	August	2015	2015.5
90	90	2015-08-06 10:00:00	20.519	Paul Smith's College VIC	pscvic_1	2015-08-06	2015-08	August	2015	2015.5
91	91	2015-08-06	22.525	Paul Smith's College VIC	pscvic_1	2015-08-06	2015-08	August	2015	2015.5
92	92	2015-08-06 02:00:00	24.545	Paul Smith's College VIC	pscvic_1	2015-08-06	2015-08	August	2015	2015.5
93	93	2015-08-06 04:00:00	19.187	Paul Smith's College VIC	pscvic_1	2015-08-06	2015-08	August	2015	2015.5
94	94	2015-08-06 06:00:00	18.901	Paul Smith's College VIC	pscvic_1	2015-08-06	2015-08	August	2015	2015.5
95	95	2015-08-06 08:00:00	14.517	Paul Smith's College VIC	pscvic_1	2015-08-06	2015-08	August	2015	2015.5
96	96	2015-08-06 10:00:00	10.259	Paul Smith's College VIC	pscvic_1	2015-08-06	2015-08	August	2015	2015.5
97	97	2015-08-07	12.11	Paul Smith's College VIC	pscvic_1	2015-08-07	2015-08	August	2015	2015.5
98	98	2015-08-07 02:00:00	8.978	Paul Smith's College VIC	pscvic_1	2015-08-07	2015-08	August	2015	2015.5
99	99	2015-08-07 04:00:00	5.244	Paul Smith's College VIC	pscvic_1	2015-08-07	2015-08	August	2015	2015.5
100	100	2015-08-07 06:00:00	3.788	Paul Smith's College VIC	pscvic_1	2015-08-07	2015-08	August	2015	2015.5
101	101	2015-08-07 08:00:00	16.713	Paul Smith's College VIC	pscvic_1	2015-08-07	2015-08	August	2015	2015.5
102	102	2015-08-07 10:00:00	23.484	Paul Smith's College VIC	pscvic_1	2015-08-07	2015-08	August	2015	2015.5
103	103	2015-08-07	25.902	Paul Smith's College VIC	pscvic_1	2015-08-07	2015-08	August	2015	2015.5
104	104	2015-08-07 02:00:00	24.255	Paul Smith's College VIC	pscvic_1	2015-08-07	2015-08	August	2015	2015.5
105	105	2015-08-07 04:00:00	26.488	Paul Smith's College VIC	pscvic_1	2015-08-07	2015-08	August	2015	2015.5
106	106	2015-08-07 06:00:00	23.004	Paul Smith's College VIC	pscvic_1	2015-08-07	2015-08	August	2015	2015.5
107	107	2015-08-07 08:00:00	13.75	Paul Smith's College VIC	pscvic_1	2015-08-07	2015-08	August	2015	2015.5
108	108	2015-08-07 10:00:00	8.382	Paul Smith's College VIC	pscvic_1	2015-08-07	2015-08	August	2015	2015.5
109	109	2015-08-08	5.347	Paul Smith's College VIC	pscvic_1	2015-08-08	2015-08	August	2015	2015.5
110	110	2015-08-08 02:00:00	3.998	Paul Smith's College VIC	pscvic_1	2015-08-08	2015-08	August	2015	2015.5
111	111	2015-08-08 04:00:00	2.517	Paul Smith's College VIC	pscvic_1	2015-08-08	2015-08	August	2015	2015.5
112	112	2015-08-08 06:00:00	2.41	Paul Smith's College VIC	pscvic_1	2015-08-08	2015-08	August	2015	2015.5
113	113	2015-08-08 08:00:00	13.654	Paul Smith's College VIC	pscvic_1	2015-08-08	2015-08	August	2015	2015.5
114	114	2015-08-08 10:00:00	19.472	Paul Smith's College VIC	pscvic_1	2015-08-08	2015-08	August	2015	2015.5
115	115	2015-08-08	22.525	Paul Smith's College VIC	pscvic_1	2015-08-08	2015-08	August	2015	2015.5
116	116	2015-08-08 02:00:00	23.773	Paul Smith's College VIC	pscvic_1	2015-08-08	2015-08	August	2015	2015.5
117	117	2015-08-08 04:00:00	23.196	Paul Smith's College VIC	pscvic_1	2015-08-08	2015-08	August	2015	2015.5
118	118	2015-08-08 06:00:00	23.484	Paul Smith's College VIC	pscvic_1	2015-08-08	2015-08	August	2015	2015.5
119	119	2015-08-08 08:00:00	16.523	Paul Smith's College VIC	pscvic_1	2015-08-08	2015-08	August	2015	2015.5
120	120	2015-08-08 10:00:00	11.625	Paul Smith's College VIC	pscvic_1	2015-08-08	2015-08	August	2015	2015.5
121	121	2015-08-09	10.846	Paul Smith's College VIC	pscvic_1	2015-08-09	2015-08	August	2015	2015.5
122	122	2015-08-09 02:00:00	8.382	Paul Smith's College VIC	pscvic_1	2015-08-09	2015-08	August	2015	2015.5
123	123	2015-08-09 04:00:00	5.962	Paul Smith's College VIC	pscvic_1	2015-08-09	2015-08	August	2015	2015.5
124	124	2015-08-09 06:00:00	4.102	Paul Smith's College VIC	pscvic_1	2015-08-09	2015-08	August	2015	2015.5
125	125	2015-08-09 08:00:00	15.855	Paul Smith's College VIC	pscvic_1	2015-08-09	2015-08	August	2015	2015.5
126	126	2015-08-09 10:00:00	24.641	Paul Smith's College VIC	pscvic_1	2015-08-09	2015-08	August	2015	2015.5
127	127	2015-08-09	28.953	Paul Smith's College VIC	pscvic_1	2015-08-09	2015-08	August	2015	2015.5
128	128	2015-08-09 02:00:00	29.252	Paul Smith's College VIC	pscvic_1	2015-08-09	2015-08	August	2015	2015.5
129	129	2015-08-09 04:00:00	30.862	Paul Smith's College VIC	pscvic_1	2015-08-09	2015-08	August	2015	2015.5
130	130	2015-08-09 06:00:00	28.357	Paul Smith's College VIC	pscvic_1	2015-08-09	2015-08	August	2015	2015.5
131	131	2015-08-09 08:00:00	18.331	Paul Smith's College VIC	pscvic_1	2015-08-09	2015-08	August	2015	2015.5
132	132	2015-08-09 10:00:00	12.401	Paul Smith's College VIC	pscvic_1	2015-08-09	2015-08	August	2015	2015.5
133	133	2015-08-10	10.063	Paul Smith's College VIC	pscvic_1	2015-08-10	2015-08	August	2015	2015.5
134	134	2015-08-10 02:00:00	7.582	Paul Smith's College VIC	pscvic_1	2015-08-10	2015-08	August	2015	2015.5
135	135	2015-08-10 04:00:00	7.079	Paul Smith's College VIC	pscvic_1	2015-08-10	2015-08	August	2015	2015.5
136	136	2015-08-10 06:00:00	8.182	Paul Smith's College VIC	pscvic_1	2015-08-10	2015-08	August	2015	2015.5
137	137	2015-08-10 08:00:00	17.284	Paul Smith's College VIC	pscvic_1	2015-08-10	2015-08	August	2015	2015.5
138	138	2015-08-10 10:00:00	26.097	Paul Smith's College VIC	pscvic_1	2015-08-10	2015-08	August	2015	2015.5
139	139	2015-08-10	30.356	Paul Smith's College VIC	pscvic_1	2015-08-10	2015-08	August	2015	2015.5
140	140	2015-08-10 02:00:00	25.125	Paul Smith's College VIC	pscvic_1	2015-08-10	2015-08	August	2015	2015.5
141	141	2015-08-10 04:00:00	25.319	Paul Smith's College VIC	pscvic_1	2015-08-10	2015-08	August	2015	2015.5
142	142	2015-08-10 06:00:00	20.805	Paul Smith's College VIC	pscvic_1	2015-08-10	2015-08	August	2015	2015.5
143	143	2015-08-10 08:00:00	17.76	Paul Smith's College VIC	pscvic_1	2015-08-10	2015-08	August	2015	2015.5
144	144	2015-08-10 10:00:00	17.189	Paul Smith's College VIC	pscvic_1	2015-08-10	2015-08	August	2015	2015.5
145	145	2015-08-11	18.521	Paul Smith's College VIC	pscvic_1	2015-08-11	2015-08	August	2015	2015.5
146	146	2015-08-11 02:00:00	17.76	Paul Smith's College VIC	pscvic_1	2015-08-11	2015-08	August	2015	2015.5
147	147	2015-08-11 04:00:00	16.427	Paul Smith's College VIC	pscvic_1	2015-08-11	2015-08	August	2015	2015.5
148	148	2015-08-11 06:00:00	16.141	Paul Smith's College VIC	pscvic_1	2015-08-11	2015-08	August	2015	2015.5
149	149	2015-08-11 08:00:00	16.332	Paul Smith's College VIC	pscvic_1	2015-08-11	2015-08	August	2015	2015.5
150	150	2015-08-11 10:00:00	17.284	Paul Smith's College VIC	pscvic_1	2015-08-11	2015-08	August	2015	2015.5
151	151	2015-08-11	20.043	Paul Smith's College VIC	pscvic_1	2015-08-11	2015-08	August	2015	2015.5
152	152	2015-08-11 02:00:00	23.292	Paul Smith's College VIC	pscvic_1	2015-08-11	2015-08	August	2015	2015.5
153	153	2015-08-11 04:00:00	20.901	Paul Smith's College VIC	pscvic_1	2015-08-11	2015-08	August	2015	2015.5
154	154	2015-08-11 06:00:00	18.806	Paul Smith's College VIC	pscvic_1	2015-08-11	2015-08	August	2015	2015.5
155	155	2015-08-11 08:00:00	18.045	Paul Smith's College VIC	pscvic_1	2015-08-11	2015-08	August	2015	2015.5
156	156	2015-08-11 10:00:00	17.57	Paul Smith's College VIC	pscvic_1	2015-08-11	2015-08	August	2015	2015.5
157	157	2015-08-12	16.427	Paul Smith's College VIC	pscvic_1	2015-08-12	2015-08	August	2015	2015.5
158	158	2015-08-12 02:00:00	15.855	Paul Smith's College VIC	pscvic_1	2015-08-12	2015-08	August	2015	2015.5
159	159	2015-08-12 04:00:00	15.473	Paul Smith's College VIC	pscvic_1	2015-08-12	2015-08	August	2015	2015.5
160	160	2015-08-12 06:00:00	14.996	Paul Smith's College VIC	pscvic_1	2015-08-12	2015-08	August	2015	2015.5
161	161	2015-08-12 08:00:00	16.237	Paul Smith's College VIC	pscvic_1	2015-08-12	2015-08	August	2015	2015.5
162	162	2015-08-12 10:00:00	17.094	Paul Smith's College VIC	pscvic_1	2015-08-12	2015-08	August	2015	2015.5
163	163	2015-08-12	20.901	Paul Smith's College VIC	pscvic_1	2015-08-12	2015-08	August	2015	2015.5
164	164	2015-08-12 02:00:00	22.142	Paul Smith's College VIC	pscvic_1	2015-08-12	2015-08	August	2015	2015.5
165	165	2015-08-12 04:00:00	24.448	Paul Smith's College VIC	pscvic_1	2015-08-12	2015-08	August	2015	2015.5
166	166	2015-08-12 06:00:00	19.472	Paul Smith's College VIC	pscvic_1	2015-08-12	2015-08	August	2015	2015.5
167	167	2015-08-12 08:00:00	14.709	Paul Smith's College VIC	pscvic_1	2015-08-12	2015-08	August	2015	2015.5
168	168	2015-08-12 10:00:00	14.134	Paul Smith's College VIC	pscvic_1	2015-08-12	2015-08	August	2015	2015.5
169	169	2015-08-13	13.75	Paul Smith's College VIC	pscvic_1	2015-08-13	2015-08	August	2015	2015.5
170	170	2015-08-13 02:00:00	13.558	Paul Smith's College VIC	pscvic_1	2015-08-13	2015-08	August	2015	2015.5
171	171	2015-08-13 04:00:00	13.365	Paul Smith's College VIC	pscvic_1	2015-08-13	2015-08	August	2015	2015.5
172	172	2015-08-13 06:00:00	12.69	Paul Smith's College VIC	pscvic_1	2015-08-13	2015-08	August	2015	2015.5
173	173	2015-08-13 08:00:00	15.569	Paul Smith's College VIC	pscvic_1	2015-08-13	2015-08	August	2015	2015.5
174	174	2015-08-13 10:00:00	18.426	Paul Smith's College VIC	pscvic_1	2015-08-13	2015-08	August	2015	2015.5
175	175	2015-08-13	21.664	Paul Smith's College VIC	pscvic_1	2015-08-13	2015-08	August	2015	2015.5
176	176	2015-08-13 02:00:00	23.004	Paul Smith's College VIC	pscvic_1	2015-08-13	2015-08	August	2015	2015.5
177	177	2015-08-13 04:00:00	26.585	Paul Smith's College VIC	pscvic_1	2015-08-13	2015-08	August	2015	2015.5
178	178	2015-08-13 06:00:00	24.255	Paul Smith's College VIC	pscvic_1	2015-08-13	2015-08	August	2015	2015.5
179	179	2015-08-13 08:00:00	13.269	Paul Smith's College VIC	pscvic_1	2015-08-13	2015-08	August	2015	2015.5
180	180	2015-08-13 10:00:00	7.983	Paul Smith's College VIC	pscvic_1	2015-08-13	2015-08	August	2015	2015.5
181	181	2015-08-14	6.37	Paul Smith's College VIC	pscvic_1	2015-08-14	2015-08	August	2015	2015.5
182	182	2015-08-14 02:00:00	5.244	Paul Smith's College VIC	pscvic_1	2015-08-14	2015-08	August	2015	2015.5
183	183	2015-08-14 04:00:00	5.962	Paul Smith's College VIC	pscvic_1	2015-08-14	2015-08	August	2015	2015.5
184	184	2015-08-14 06:00:00	6.064	Paul Smith's College VIC	pscvic_1	2015-08-14	2015-08	August	2015	2015.5
185	185	2015-08-14 08:00:00	14.038	Paul Smith's College VIC	pscvic_1	2015-08-14	2015-08	August	2015	2015.5
186	186	2015-08-14 10:00:00	25.805	Paul Smith's College VIC	pscvic_1	2015-08-14	2015-08	August	2015	2015.5
187	187	2015-08-14	27.764	Paul Smith's College VIC	pscvic_1	2015-08-14	2015-08	August	2015	2015.5
188	188	2015-08-14 02:00:00	27.468	Paul Smith's College VIC	pscvic_1	2015-08-14	2015-08	August	2015	2015.5
189	189	2015-08-14 04:00:00	23.677	Paul Smith's College VIC	pscvic_1	2015-08-14	2015-08	August	2015	2015.5
190	190	2015-08-14 06:00:00	22.429	Paul Smith's College VIC	pscvic_1	2015-08-14	2015-08	August	2015	2015.5
191	191	2015-08-14 08:00:00	19.472	Paul Smith's College VIC	pscvic_1	2015-08-14	2015-08	August	2015	2015.5
192	192	2015-08-14 10:00:00	15.76	Paul Smith's College VIC	pscvic_1	2015-08-14	2015-08	August	2015	2015.5
193	193	2015-08-15	17.76	Paul Smith's College VIC	pscvic_1	2015-08-15	2015-08	August	2015	2015.5
194	194	2015-08-15 02:00:00	18.711	Paul Smith's College VIC	pscvic_1	2015-08-15	2015-08	August	2015	2015.5
195	195	2015-08-15 04:00:00	17.855	Paul Smith's College VIC	pscvic_1	2015-08-15	2015-08	August	2015	2015.5
196	196	2015-08-15 06:00:00	17.475	Paul Smith's College VIC	pscvic_1	2015-08-15	2015-08	August	2015	2015.5
197	197	2015-08-15 08:00:00	18.996	Paul Smith's College VIC	pscvic_1	2015-08-15	2015-08	August	2015	2015.5
198	198	2015-08-15 10:00:00	23.292	Paul Smith's College VIC	pscvic_1	2015-08-15	2015-08	August	2015	2015.5
199	199	2015-08-15	26.292	Paul Smith's College VIC	pscvic_1	2015-08-15	2015-08	August	2015	2015.5
200	200	2015-08-15 02:00:00	19.662	Paul Smith's College VIC	pscvic_1	2015-08-15	2015-08	August	2015	2015.5
201	201	2015-08-15 04:00:00	23.677	Paul Smith's College VIC	pscvic_1	2015-08-15	2015-08	August	2015	2015.5
202	202	2015-08-15 06:00:00	20.329	Paul Smith's College VIC	pscvic_1	2015-08-15	2015-08	August	2015	2015.5
203	203	2015-08-15 08:00:00	16.523	Paul Smith's College VIC	pscvic_1	2015-08-15	2015-08	August	2015	2015.5
204	204	2015-08-15 10:00:00	13.558	Paul Smith's College VIC	pscvic_1	2015-08-15	2015-08	August	2015	2015.5
205	205	2015-08-16	13.461	Paul Smith's College VIC	pscvic_1	2015-08-16	2015-08	August	2015	2015.5
206	206	2015-08-16 02:00:00	14.134	Paul Smith's College VIC	pscvic_1	2015-08-16	2015-08	August	2015	2015.5
207	207	2015-08-16 04:00:00	14.709	Paul Smith's College VIC	pscvic_1	2015-08-16	2015-08	August	2015	2015.5
208	208	2015-08-16 06:00:00	15.187	Paul Smith's College VIC	pscvic_1	2015-08-16	2015-08	August	2015	2015.5
209	209	2015-08-16 08:00:00	17.95	Paul Smith's College VIC	pscvic_1	2015-08-16	2015-08	August	2015	2015.5
210	210	2015-08-16 10:00:00	26.585	Paul Smith's College VIC	pscvic_1	2015-08-16	2015-08	August	2015	2015.5
211	211	2015-08-16	29.352	Paul Smith's College VIC	pscvic_1	2015-08-16	2015-08	August	2015	2015.5
212	212	2015-08-16 02:00:00	33.222	Paul Smith's College VIC	pscvic_1	2015-08-16	2015-08	August	2015	2015.5
213	213	2015-08-16 04:00:00	31.88	Paul Smith's College VIC	pscvic_1	2015-08-16	2015-08	August	2015	2015.5
214	214	2015-08-16 06:00:00	29.752	Paul Smith's College VIC	pscvic_1	2015-08-16	2015-08	August	2015	2015.5
215	215	2015-08-16 08:00:00	18.236	Paul Smith's College VIC	pscvic_1	2015-08-16	2015-08	August	2015	2015.5
216	216	2015-08-16 10:00:00	14.517	Paul Smith's College VIC	pscvic_1	2015-08-16	2015-08	August	2015	2015.5
217	217	2015-08-17	12.013	Paul Smith's College VIC	pscvic_1	2015-08-17	2015-08	August	2015	2015.5
218	218	2015-08-17 02:00:00	10.553	Paul Smith's College VIC	pscvic_1	2015-08-17	2015-08	August	2015	2015.5
219	219	2015-08-17 04:00:00	10.063	Paul Smith's College VIC	pscvic_1	2015-08-17	2015-08	August	2015	2015.5
220	220	2015-08-17 06:00:00	9.275	Paul Smith's College VIC	pscvic_1	2015-08-17	2015-08	August	2015	2015.5
221	221	2015-08-17 08:00:00	19.282	Paul Smith's College VIC	pscvic_1	2015-08-17	2015-08	August	2015	2015.5
222	222	2015-08-17 10:00:00	28.357	Paul Smith's College VIC	pscvic_1	2015-08-17	2015-08	August	2015	2015.5
223	223	2015-08-17	32.704	Paul Smith's College VIC	pscvic_1	2015-08-17	2015-08	August	2015	2015.5
224	224	2015-08-17 02:00:00	35.115	Paul Smith's College VIC	pscvic_1	2015-08-17	2015-08	August	2015	2015.5
225	225	2015-08-17 04:00:00	33.43	Paul Smith's College VIC	pscvic_1	2015-08-17	2015-08	August	2015	2015.5
226	226	2015-08-17 06:00:00	29.953	Paul Smith's College VIC	pscvic_1	2015-08-17	2015-08	August	2015	2015.5
227	227	2015-08-17 08:00:00	19.948	Paul Smith's College VIC	pscvic_1	2015-08-17	2015-08	August	2015	2015.5
228	228	2015-08-17 10:00:00	14.038	Paul Smith's College VIC	pscvic_1	2015-08-17	2015-08	August	2015	2015.5
229	229	2015-08-18	12.497	Paul Smith's College VIC	pscvic_1	2015-08-18	2015-08	August	2015	2015.5
230	230	2015-08-18 02:00:00	11.916	Paul Smith's College VIC	pscvic_1	2015-08-18	2015-08	August	2015	2015.5
231	231	2015-08-18 04:00:00	11.431	Paul Smith's College VIC	pscvic_1	2015-08-18	2015-08	August	2015	2015.5
232	232	2015-08-18 06:00:00	11.236	Paul Smith's College VIC	pscvic_1	2015-08-18	2015-08	August	2015	2015.5
233	233	2015-08-18 08:00:00	19.282	Paul Smith's College VIC	pscvic_1	2015-08-18	2015-08	August	2015	2015.5
234	234	2015-08-18 10:00:00	29.552	Paul Smith's College VIC	pscvic_1	2015-08-18	2015-08	August	2015	2015.5
235	235	2015-08-18	33.639	Paul Smith's College VIC	pscvic_1	2015-08-18	2015-08	August	2015	2015.5
236	236	2015-08-18 02:00:00	34.691	Paul Smith's College VIC	pscvic_1	2015-08-18	2015-08	August	2015	2015.5
237	237	2015-08-18 04:00:00	30.154	Paul Smith's College VIC	pscvic_1	2015-08-18	2015-08	August	2015	2015.5
238	238	2015-08-18 06:00:00	29.752	Paul Smith's College VIC	pscvic_1	2015-08-18	2015-08	August	2015	2015.5
239	239	2015-08-18 08:00:00	22.046	Paul Smith's College VIC	pscvic_1	2015-08-18	2015-08	August	2015	2015.5
240	240	2015-08-18 10:00:00	19.187	Paul Smith's College VIC	pscvic_1	2015-08-18	2015-08	August	2015	2015.5
241	241	2015-08-19	16.427	Paul Smith's College VIC	pscvic_1	2015-08-19	2015-08	August	2015	2015.5
242	242	2015-08-19 02:00:00	14.709	Paul Smith's College VIC	pscvic_1	2015-08-19	2015-08	August	2015	2015.5
243	243	2015-08-19 04:00:00	13.173	Paul Smith's College VIC	pscvic_1	2015-08-19	2015-08	August	2015	2015.5
244	244	2015-08-19 06:00:00	12.98	Paul Smith's College VIC	pscvic_1	2015-08-19	2015-08	August	2015	2015.5
245	245	2015-08-19 08:00:00	20.805	Paul Smith's College VIC	pscvic_1	2015-08-19	2015-08	August	2015	2015.5
246	246	2015-08-19 10:00:00	30.255	Paul Smith's College VIC	pscvic_1	2015-08-19	2015-08	August	2015	2015.5
247	247	2015-08-19	34.058	Paul Smith's College VIC	pscvic_1	2015-08-19	2015-08	August	2015	2015.5
248	248	2015-08-19 02:00:00	33.743	Paul Smith's College VIC	pscvic_1	2015-08-19	2015-08	August	2015	2015.5
249	249	2015-08-19 04:00:00	33.953	Paul Smith's College VIC	pscvic_1	2015-08-19	2015-08	August	2015	2015.5
250	250	2015-08-19 06:00:00	30.558	Paul Smith's College VIC	pscvic_1	2015-08-19	2015-08	August	2015	2015.5
251	251	2015-08-19 08:00:00	22.621	Paul Smith's College VIC	pscvic_1	2015-08-19	2015-08	August	2015	2015.5
252	252	2015-08-19 10:00:00	18.616	Paul Smith's College VIC	pscvic_1	2015-08-19	2015-08	August	2015	2015.5
253	253	2015-08-20	20.996	Paul Smith's College VIC	pscvic_1	2015-08-20	2015-08	August	2015	2015.5
254	254	2015-08-20 02:00:00	20.519	Paul Smith's College VIC	pscvic_1	2015-08-20	2015-08	August	2015	2015.5
255	255	2015-08-20 04:00:00	18.996	Paul Smith's College VIC	pscvic_1	2015-08-20	2015-08	August	2015	2015.5
256	256	2015-08-20 06:00:00	18.045	Paul Smith's College VIC	pscvic_1	2015-08-20	2015-08	August	2015	2015.5
257	257	2015-08-20 08:00:00	24.641	Paul Smith's College VIC	pscvic_1	2015-08-20	2015-08	August	2015	2015.5
258	258	2015-08-20 10:00:00	26.292	Paul Smith's College VIC	pscvic_1	2015-08-20	2015-08	August	2015	2015.5
259	259	2015-08-20	31.37	Paul Smith's College VIC	pscvic_1	2015-08-20	2015-08	August	2015	2015.5
260	260	2015-08-20 02:00:00	31.37	Paul Smith's College VIC	pscvic_1	2015-08-20	2015-08	August	2015	2015.5
261	261	2015-08-20 04:00:00	27.764	Paul Smith's College VIC	pscvic_1	2015-08-20	2015-08	August	2015	2015.5
262	262	2015-08-20 06:00:00	26.585	Paul Smith's College VIC	pscvic_1	2015-08-20	2015-08	August	2015	2015.5
263	263	2015-08-20 08:00:00	23.869	Paul Smith's College VIC	pscvic_1	2015-08-20	2015-08	August	2015	2015.5
264	264	2015-08-20 10:00:00	23.677	Paul Smith's College VIC	pscvic_1	2015-08-20	2015-08	August	2015	2015.5
265	265	2015-08-21	18.045	Paul Smith's College VIC	pscvic_1	2015-08-21	2015-08	August	2015	2015.5
266	266	2015-08-21 02:00:00	15.473	Paul Smith's College VIC	pscvic_1	2015-08-21	2015-08	August	2015	2015.5
267	267	2015-08-21 04:00:00	15.473	Paul Smith's College VIC	pscvic_1	2015-08-21	2015-08	August	2015	2015.5
268	268	2015-08-21 06:00:00	14.804	Paul Smith's College VIC	pscvic_1	2015-08-21	2015-08	August	2015	2015.5
269	269	2015-08-21 08:00:00	18.996	Paul Smith's College VIC	pscvic_1	2015-08-21	2015-08	August	2015	2015.5
270	270	2015-08-21 10:00:00	24.448	Paul Smith's College VIC	pscvic_1	2015-08-21	2015-08	August	2015	2015.5
271	271	2015-08-21	26.977	Paul Smith's College VIC	pscvic_1	2015-08-21	2015-08	August	2015	2015.5
272	272	2015-08-21 02:00:00	25.319	Paul Smith's College VIC	pscvic_1	2015-08-21	2015-08	August	2015	2015.5
273	273	2015-08-21 04:00:00	27.764	Paul Smith's College VIC	pscvic_1	2015-08-21	2015-08	August	2015	2015.5
274	274	2015-08-21 06:00:00	21.951	Paul Smith's College VIC	pscvic_1	2015-08-21	2015-08	August	2015	2015.5
275	275	2015-08-21 08:00:00	15.091	Paul Smith's College VIC	pscvic_1	2015-08-21	2015-08	August	2015	2015.5
276	276	2015-08-21 10:00:00	9.373	Paul Smith's College VIC	pscvic_1	2015-08-21	2015-08	August	2015	2015.5
277	277	2015-08-22	6.37	Paul Smith's College VIC	pscvic_1	2015-08-22	2015-08	August	2015	2015.5
278	278	2015-08-22 02:00:00	5.86	Paul Smith's College VIC	pscvic_1	2015-08-22	2015-08	August	2015	2015.5
279	279	2015-08-22 04:00:00	5.347	Paul Smith's College VIC	pscvic_1	2015-08-22	2015-08	August	2015	2015.5
280	280	2015-08-22 06:00:00	7.582	Paul Smith's College VIC	pscvic_1	2015-08-22	2015-08	August	2015	2015.5
281	281	2015-08-22 08:00:00	13.942	Paul Smith's College VIC	pscvic_1	2015-08-22	2015-08	August	2015	2015.5
282	282	2015-08-22 10:00:00	24.931	Paul Smith's College VIC	pscvic_1	2015-08-22	2015-08	August	2015	2015.5
283	283	2015-08-22	28.456	Paul Smith's College VIC	pscvic_1	2015-08-22	2015-08	August	2015	2015.5
284	284	2015-08-22 02:00:00	21.569	Paul Smith's College VIC	pscvic_1	2015-08-22	2015-08	August	2015	2015.5
285	285	2015-08-22 04:00:00	24.545	Paul Smith's College VIC	pscvic_1	2015-08-22	2015-08	August	2015	2015.5
286	286	2015-08-22 06:00:00	21.951	Paul Smith's College VIC	pscvic_1	2015-08-22	2015-08	August	2015	2015.5
287	287	2015-08-22 08:00:00	16.618	Paul Smith's College VIC	pscvic_1	2015-08-22	2015-08	August	2015	2015.5
288	288	2015-08-22 10:00:00	14.9	Paul Smith's College VIC	pscvic_1	2015-08-22	2015-08	August	2015	2015.5
289	289	2015-08-23	10.651	Paul Smith's College VIC	pscvic_1	2015-08-23	2015-08	August	2015	2015.5
290	290	2015-08-23 02:00:00	7.481	Paul Smith's College VIC	pscvic_1	2015-08-23	2015-08	August	2015	2015.5
291	291	2015-08-23 04:00:00	6.978	Paul Smith's College VIC	pscvic_1	2015-08-23	2015-08	August	2015	2015.5
292	292	2015-08-23 06:00:00	9.176	Paul Smith's College VIC	pscvic_1	2015-08-23	2015-08	August	2015	2015.5
293	293	2015-08-23 08:00:00	13.942	Paul Smith's College VIC	pscvic_1	2015-08-23	2015-08	August	2015	2015.5
294	294	2015-08-23 10:00:00	19.662	Paul Smith's College VIC	pscvic_1	2015-08-23	2015-08	August	2015	2015.5
295	295	2015-08-23	28.06	Paul Smith's College VIC	pscvic_1	2015-08-23	2015-08	August	2015	2015.5
296	296	2015-08-23 02:00:00	30.457	Paul Smith's College VIC	pscvic_1	2015-08-23	2015-08	August	2015	2015.5
297	297	2015-08-23 04:00:00	31.064	Paul Smith's College VIC	pscvic_1	2015-08-23	2015-08	August	2015	2015.5
298	298	2015-08-23 06:00:00	28.754	Paul Smith's College VIC	pscvic_1	2015-08-23	2015-08	August	2015	2015.5
299	299	2015-08-23 08:00:00	14.23	Paul Smith's College VIC	pscvic_1	2015-08-23	2015-08	August	2015	2015.5
300	300	2015-08-23 10:00:00	13.076	Paul Smith's College VIC	pscvic_1	2015-08-23	2015-08	August	2015	2015.5
301	301	2015-08-24	9.669	Paul Smith's College VIC	pscvic_1	2015-08-24	2015-08	August	2015	2015.5
302	302	2015-08-24 02:00:00	8.481	Paul Smith's College VIC	pscvic_1	2015-08-24	2015-08	August	2015	2015.5
303	303	2015-08-24 04:00:00	7.481	Paul Smith's College VIC	pscvic_1	2015-08-24	2015-08	August	2015	2015.5
304	304	2015-08-24 06:00:00	7.381	Paul Smith's College VIC	pscvic_1	2015-08-24	2015-08	August	2015	2015.5
305	305	2015-08-24 08:00:00	16.141	Paul Smith's College VIC	pscvic_1	2015-08-24	2015-08	August	2015	2015.5
306	306	2015-08-24 10:00:00	25.902	Paul Smith's College VIC	pscvic_1	2015-08-24	2015-08	August	2015	2015.5
307	307	2015-08-24	29.152	Paul Smith's College VIC	pscvic_1	2015-08-24	2015-08	August	2015	2015.5
308	308	2015-08-24 02:00:00	26.977	Paul Smith's College VIC	pscvic_1	2015-08-24	2015-08	August	2015	2015.5
309	309	2015-08-24 04:00:00	23.869	Paul Smith's College VIC	pscvic_1	2015-08-24	2015-08	August	2015	2015.5
310	310	2015-08-24 06:00:00	20.043	Paul Smith's College VIC	pscvic_1	2015-08-24	2015-08	August	2015	2015.5
311	311	2015-08-24 08:00:00	17.57	Paul Smith's College VIC	pscvic_1	2015-08-24	2015-08	August	2015	2015.5
312	312	2015-08-24 10:00:00	14.038	Paul Smith's College VIC	pscvic_1	2015-08-24	2015-08	August	2015	2015.5
313	313	2015-08-25	10.651	Paul Smith's College VIC	pscvic_1	2015-08-25	2015-08	August	2015	2015.5
314	314	2015-08-25 02:00:00	7.682	Paul Smith's College VIC	pscvic_1	2015-08-25	2015-08	August	2015	2015.5
315	315	2015-08-25 04:00:00	5.757	Paul Smith's College VIC	pscvic_1	2015-08-25	2015-08	August	2015	2015.5
316	316	2015-08-25 06:00:00	6.064	Paul Smith's College VIC	pscvic_1	2015-08-25	2015-08	August	2015	2015.5
317	317	2015-08-25 08:00:00	13.846	Paul Smith's College VIC	pscvic_1	2015-08-25	2015-08	August	2015	2015.5
318	318	2015-08-25 10:00:00	25.416	Paul Smith's College VIC	pscvic_1	2015-08-25	2015-08	August	2015	2015.5
319	319	2015-08-25	28.06	Paul Smith's College VIC	pscvic_1	2015-08-25	2015-08	August	2015	2015.5
320	320	2015-08-25 02:00:00	28.06	Paul Smith's College VIC	pscvic_1	2015-08-25	2015-08	August	2015	2015.5
321	321	2015-08-25 04:00:00	23.869	Paul Smith's College VIC	pscvic_1	2015-08-25	2015-08	August	2015	2015.5
322	322	2015-08-25 06:00:00	23.004	Paul Smith's College VIC	pscvic_1	2015-08-25	2015-08	August	2015	2015.5
323	323	2015-08-25 08:00:00	15.951	Paul Smith's College VIC	pscvic_1	2015-08-25	2015-08	August	2015	2015.5
324	324	2015-08-25 10:00:00	8.978	Paul Smith's College VIC	pscvic_1	2015-08-25	2015-08	August	2015	2015.5
325	325	2015-08-26	5.962	Paul Smith's College VIC	pscvic_1	2015-08-26	2015-08	August	2015	2015.5
326	326	2015-08-26 02:00:00	4.415	Paul Smith's College VIC	pscvic_1	2015-08-26	2015-08	August	2015	2015.5
327	327	2015-08-26 04:00:00	7.582	Paul Smith's College VIC	pscvic_1	2015-08-26	2015-08	August	2015	2015.5
328	328	2015-08-26 06:00:00	8.68	Paul Smith's College VIC	pscvic_1	2015-08-26	2015-08	August	2015	2015.5
329	329	2015-08-26 08:00:00	13.75	Paul Smith's College VIC	pscvic_1	2015-08-26	2015-08	August	2015	2015.5
330	330	2015-08-26 10:00:00	18.426	Paul Smith's College VIC	pscvic_1	2015-08-26	2015-08	August	2015	2015.5
331	331	2015-08-26	23.581	Paul Smith's College VIC	pscvic_1	2015-08-26	2015-08	August	2015	2015.5
332	332	2015-08-26 02:00:00	22.621	Paul Smith's College VIC	pscvic_1	2015-08-26	2015-08	August	2015	2015.5
333	333	2015-08-26 04:00:00	20.234	Paul Smith's College VIC	pscvic_1	2015-08-26	2015-08	August	2015	2015.5
334	334	2015-08-26 06:00:00	18.426	Paul Smith's College VIC	pscvic_1	2015-08-26	2015-08	August	2015	2015.5
335	335	2015-08-26 08:00:00	14.996	Paul Smith's College VIC	pscvic_1	2015-08-26	2015-08	August	2015	2015.5
336	336	2015-08-26 10:00:00	11.819	Paul Smith's College VIC	pscvic_1	2015-08-26	2015-08	August	2015	2015.5
337	337	2015-08-27	12.497	Paul Smith's College VIC	pscvic_1	2015-08-27	2015-08	August	2015	2015.5
338	338	2015-08-27 02:00:00	12.98	Paul Smith's College VIC	pscvic_1	2015-08-27	2015-08	August	2015	2015.5
339	339	2015-08-27 04:00:00	12.883	Paul Smith's College VIC	pscvic_1	2015-08-27	2015-08	August	2015	2015.5
340	340	2015-08-27 06:00:00	12.69	Paul Smith's College VIC	pscvic_1	2015-08-27	2015-08	August	2015	2015.5
341	341	2015-08-27 08:00:00	13.365	Paul Smith's College VIC	pscvic_1	2015-08-27	2015-08	August	2015	2015.5
342	342	2015-08-27 10:00:00	17.284	Paul Smith's College VIC	pscvic_1	2015-08-27	2015-08	August	2015	2015.5
343	343	2015-08-27	19.187	Paul Smith's College VIC	pscvic_1	2015-08-27	2015-08	August	2015	2015.5
344	344	2015-08-27 02:00:00	19.567	Paul Smith's College VIC	pscvic_1	2015-08-27	2015-08	August	2015	2015.5
345	345	2015-08-27 04:00:00	22.525	Paul Smith's College VIC	pscvic_1	2015-08-27	2015-08	August	2015	2015.5
346	346	2015-08-27 06:00:00	17.665	Paul Smith's College VIC	pscvic_1	2015-08-27	2015-08	August	2015	2015.5
347	347	2015-08-27 08:00:00	14.9	Paul Smith's College VIC	pscvic_1	2015-08-27	2015-08	August	2015	2015.5
348	348	2015-08-27 10:00:00	12.98	Paul Smith's College VIC	pscvic_1	2015-08-27	2015-08	August	2015	2015.5
349	349	2015-08-28	11.431	Paul Smith's College VIC	pscvic_1	2015-08-28	2015-08	August	2015	2015.5
350	350	2015-08-28 02:00:00	11.722	Paul Smith's College VIC	pscvic_1	2015-08-28	2015-08	August	2015	2015.5
351	351	2015-08-28 04:00:00	6.268	Paul Smith's College VIC	pscvic_1	2015-08-28	2015-08	August	2015	2015.5
352	352	2015-08-28 06:00:00	8.082	Paul Smith's College VIC	pscvic_1	2015-08-28	2015-08	August	2015	2015.5
353	353	2015-08-28 08:00:00	13.076	Paul Smith's College VIC	pscvic_1	2015-08-28	2015-08	August	2015	2015.5
354	354	2015-08-28 10:00:00	20.71	Paul Smith's College VIC	pscvic_1	2015-08-28	2015-08	August	2015	2015.5
355	355	2015-08-28	27.173	Paul Smith's College VIC	pscvic_1	2015-08-28	2015-08	August	2015	2015.5
356	356	2015-08-28 02:00:00	27.862	Paul Smith's College VIC	pscvic_1	2015-08-28	2015-08	August	2015	2015.5
357	357	2015-08-28 04:00:00	23.966	Paul Smith's College VIC	pscvic_1	2015-08-28	2015-08	August	2015	2015.5
358	358	2015-08-28 06:00:00	22.142	Paul Smith's College VIC	pscvic_1	2015-08-28	2015-08	August	2015	2015.5
359	359	2015-08-28 08:00:00	11.625	Paul Smith's College VIC	pscvic_1	2015-08-28	2015-08	August	2015	2015.5
360	360	2015-08-28 10:00:00	7.682	Paul Smith's College VIC	pscvic_1	2015-08-28	2015-08	August	2015	2015.5
361	361	2015-08-29	5.244	Paul Smith's College VIC	pscvic_1	2015-08-29	2015-08	August	2015	2015.5
362	362	2015-08-29 02:00:00	4.727	Paul Smith's College VIC	pscvic_1	2015-08-29	2015-08	August	2015	2015.5
363	363	2015-08-29 04:00:00	4.102	Paul Smith's College VIC	pscvic_1	2015-08-29	2015-08	August	2015	2015.5
364	364	2015-08-29 06:00:00	5.037	Paul Smith's College VIC	pscvic_1	2015-08-29	2015-08	August	2015	2015.5
365	365	2015-08-29 08:00:00	13.75	Paul Smith's College VIC	pscvic_1	2015-08-29	2015-08	August	2015	2015.5
366	366	2015-08-29 10:00:00	20.519	Paul Smith's College VIC	pscvic_1	2015-08-29	2015-08	August	2015	2015.5
367	367	2015-08-29	26.879	Paul Smith's College VIC	pscvic_1	2015-08-29	2015-08	August	2015	2015.5
368	368	2015-08-29 02:00:00	24.158	Paul Smith's College VIC	pscvic_1	2015-08-29	2015-08	August	2015	2015.5
369	369	2015-08-29 04:00:00	27.173	Paul Smith's College VIC	pscvic_1	2015-08-29	2015-08	August	2015	2015.5
370	370	2015-08-29 06:00:00	21.664	Paul Smith's College VIC	pscvic_1	2015-08-29	2015-08	August	2015	2015.5
371	371	2015-08-29 08:00:00	17.665	Paul Smith's College VIC	pscvic_1	2015-08-29	2015-08	August	2015	2015.5
372	372	2015-08-29 10:00:00	15.187	Paul Smith's College VIC	pscvic_1	2015-08-29	2015-08	August	2015	2015.5
373	373	2015-08-30	12.883	Paul Smith's College VIC	pscvic_1	2015-08-30	2015-08	August	2015	2015.5
374	374	2015-08-30 02:00:00	12.883	Paul Smith's College VIC	pscvic_1	2015-08-30	2015-08	August	2015	2015.5
375	375	2015-08-30 04:00:00	12.11	Paul Smith's College VIC	pscvic_1	2015-08-30	2015-08	August	2015	2015.5
376	376	2015-08-30 06:00:00	11.625	Paul Smith's College VIC	pscvic_1	2015-08-30	2015-08	August	2015	2015.5
377	377	2015-08-30 08:00:00	16.999	Paul Smith's College VIC	pscvic_1	2015-08-30	2015-08	August	2015	2015.5
378	378	2015-08-30 10:00:00	23.677	Paul Smith's College VIC	pscvic_1	2015-08-30	2015-08	August	2015	2015.5
379	379	2015-08-30	26.977	Paul Smith's College VIC	pscvic_1	2015-08-30	2015-08	August	2015	2015.5
380	380	2015-08-30 02:00:00	26	Paul Smith's College VIC	pscvic_1	2015-08-30	2015-08	August	2015	2015.5
381	381	2015-08-30 04:00:00	24.351	Paul Smith's College VIC	pscvic_1	2015-08-30	2015-08	August	2015	2015.5
382	382	2015-08-30 06:00:00	22.525	Paul Smith's College VIC	pscvic_1	2015-08-30	2015-08	August	2015	2015.5
383	383	2015-08-30 08:00:00	17.665	Paul Smith's College VIC	pscvic_1	2015-08-30	2015-08	August	2015	2015.5
384	384	2015-08-30 10:00:00	13.365	Paul Smith's College VIC	pscvic_1	2015-08-30	2015-08	August	2015	2015.5
385	385	2015-08-31	9.176	Paul Smith's College VIC	pscvic_1	2015-08-31	2015-08	August	2015	2015.5
386	386	2015-08-31 02:00:00	7.782	Paul Smith's College VIC	pscvic_1	2015-08-31	2015-08	August	2015	2015.5
387	387	2015-08-31 04:00:00	11.236	Paul Smith's College VIC	pscvic_1	2015-08-31	2015-08	August	2015	2015.5
388	388	2015-08-31 06:00:00	15.282	Paul Smith's College VIC	pscvic_1	2015-08-31	2015-08	August	2015	2015.5
389	389	2015-08-31 08:00:00	19.472	Paul Smith's College VIC	pscvic_1	2015-08-31	2015-08	August	2015	2015.5
390	390	2015-08-31 10:00:00	21.187	Paul Smith's College VIC	pscvic_1	2015-08-31	2015-08	August	2015	2015.5
391	391	2015-08-31	26.781	Paul Smith's College VIC	pscvic_1	2015-08-31	2015-08	August	2015	2015.5
392	392	2015-08-31 02:00:00	24.448	Paul Smith's College VIC	pscvic_1	2015-08-31	2015-08	August	2015	2015.5
393	393	2015-08-31 04:00:00	23.677	Paul Smith's College VIC	pscvic_1	2015-08-31	2015-08	August	2015	2015.5
394	394	2015-08-31 06:00:00	24.351	Paul Smith's College VIC	pscvic_1	2015-08-31	2015-08	August	2015	2015.5
395	395	2015-08-31 08:00:00	18.806	Paul Smith's College VIC	pscvic_1	2015-08-31	2015-08	August	2015	2015.5
396	396	2015-08-31 10:00:00	15.855	Paul Smith's College VIC	pscvic_1	2015-08-31	2015-08	August	2015	2015.5
397	397	2015-09-01	11.916	Paul Smith's College VIC	pscvic_1	2015-09-01	2015-09	September	2015	2015.5
398	398	2015-09-01 02:00:00	9.275	Paul Smith's College VIC	pscvic_1	2015-09-01	2015-09	September	2015	2015.5
399	399	2015-09-01 04:00:00	8.68	Paul Smith's College VIC	pscvic_1	2015-09-01	2015-09	September	2015	2015.5
400	400	2015-09-01 06:00:00	10.748	Paul Smith's College VIC	pscvic_1	2015-09-01	2015-09	September	2015	2015.5
401	401	2015-09-01 08:00:00	15.091	Paul Smith's College VIC	pscvic_1	2015-09-01	2015-09	September	2015	2015.5
402	402	2015-09-01 10:00:00	23.292	Paul Smith's College VIC	pscvic_1	2015-09-01	2015-09	September	2015	2015.5
403	403	2015-09-01	29.552	Paul Smith's College VIC	pscvic_1	2015-09-01	2015-09	September	2015	2015.5
404	404	2015-09-01 02:00:00	32.6	Paul Smith's College VIC	pscvic_1	2015-09-01	2015-09	September	2015	2015.5
405	405	2015-09-01 04:00:00	32.497	Paul Smith's College VIC	pscvic_1	2015-09-01	2015-09	September	2015	2015.5
406	406	2015-09-01 06:00:00	28.06	Paul Smith's College VIC	pscvic_1	2015-09-01	2015-09	September	2015	2015.5
407	407	2015-09-01 08:00:00	19.948	Paul Smith's College VIC	pscvic_1	2015-09-01	2015-09	September	2015	2015.5
408	408	2015-09-01 10:00:00	13.654	Paul Smith's College VIC	pscvic_1	2015-09-01	2015-09	September	2015	2015.5
409	409	2015-09-02	13.558	Paul Smith's College VIC	pscvic_1	2015-09-02	2015-09	September	2015	2015.5
410	410	2015-09-02 02:00:00	10.944	Paul Smith's College VIC	pscvic_1	2015-09-02	2015-09	September	2015	2015.5
411	411	2015-09-02 04:00:00	9.866	Paul Smith's College VIC	pscvic_1	2015-09-02	2015-09	September	2015	2015.5
412	412	2015-09-02 06:00:00	9.472	Paul Smith's College VIC	pscvic_1	2015-09-02	2015-09	September	2015	2015.5
413	413	2015-09-02 08:00:00	16.237	Paul Smith's College VIC	pscvic_1	2015-09-02	2015-09	September	2015	2015.5
414	414	2015-09-02 10:00:00	22.142	Paul Smith's College VIC	pscvic_1	2015-09-02	2015-09	September	2015	2015.5
415	415	2015-09-02	29.752	Paul Smith's College VIC	pscvic_1	2015-09-02	2015-09	September	2015	2015.5
416	416	2015-09-02 02:00:00	30.862	Paul Smith's College VIC	pscvic_1	2015-09-02	2015-09	September	2015	2015.5
417	417	2015-09-02 04:00:00	30.457	Paul Smith's College VIC	pscvic_1	2015-09-02	2015-09	September	2015	2015.5
418	418	2015-09-02 06:00:00	24.931	Paul Smith's College VIC	pscvic_1	2015-09-02	2015-09	September	2015	2015.5
419	419	2015-09-02 08:00:00	16.237	Paul Smith's College VIC	pscvic_1	2015-09-02	2015-09	September	2015	2015.5
420	420	2015-09-02 10:00:00	14.517	Paul Smith's College VIC	pscvic_1	2015-09-02	2015-09	September	2015	2015.5
421	421	2015-09-03	13.558	Paul Smith's College VIC	pscvic_1	2015-09-03	2015-09	September	2015	2015.5
422	422	2015-09-03 02:00:00	14.421	Paul Smith's College VIC	pscvic_1	2015-09-03	2015-09	September	2015	2015.5
423	423	2015-09-03 04:00:00	14.9	Paul Smith's College VIC	pscvic_1	2015-09-03	2015-09	September	2015	2015.5
424	424	2015-09-03 06:00:00	17.189	Paul Smith's College VIC	pscvic_1	2015-09-03	2015-09	September	2015	2015.5
425	425	2015-09-03 08:00:00	19.377	Paul Smith's College VIC	pscvic_1	2015-09-03	2015-09	September	2015	2015.5
426	426	2015-09-03 10:00:00	20.901	Paul Smith's College VIC	pscvic_1	2015-09-03	2015-09	September	2015	2015.5
427	427	2015-09-03	30.154	Paul Smith's College VIC	pscvic_1	2015-09-03	2015-09	September	2015	2015.5
428	428	2015-09-03 02:00:00	30.659	Paul Smith's College VIC	pscvic_1	2015-09-03	2015-09	September	2015	2015.5
429	429	2015-09-03 04:00:00	28.06	Paul Smith's College VIC	pscvic_1	2015-09-03	2015-09	September	2015	2015.5
430	430	2015-09-03 06:00:00	23.773	Paul Smith's College VIC	pscvic_1	2015-09-03	2015-09	September	2015	2015.5
431	431	2015-09-03 08:00:00	14.709	Paul Smith's College VIC	pscvic_1	2015-09-03	2015-09	September	2015	2015.5
432	432	2015-09-03 10:00:00	11.139	Paul Smith's College VIC	pscvic_1	2015-09-03	2015-09	September	2015	2015.5
433	433	2015-09-04	8.382	Paul Smith's College VIC	pscvic_1	2015-09-04	2015-09	September	2015	2015.5
434	434	2015-09-04 02:00:00	6.573	Paul Smith's College VIC	pscvic_1	2015-09-04	2015-09	September	2015	2015.5
435	435	2015-09-04 04:00:00	4.415	Paul Smith's College VIC	pscvic_1	2015-09-04	2015-09	September	2015	2015.5
436	436	2015-09-04 06:00:00	2.088	Paul Smith's College VIC	pscvic_1	2015-09-04	2015-09	September	2015	2015.5
437	437	2015-09-04 08:00:00	10.748	Paul Smith's College VIC	pscvic_1	2015-09-04	2015-09	September	2015	2015.5
438	438	2015-09-04 10:00:00	22.812	Paul Smith's College VIC	pscvic_1	2015-09-04	2015-09	September	2015	2015.5
439	439	2015-09-04	28.456	Paul Smith's College VIC	pscvic_1	2015-09-04	2015-09	September	2015	2015.5
440	440	2015-09-04 02:00:00	30.356	Paul Smith's College VIC	pscvic_1	2015-09-04	2015-09	September	2015	2015.5
441	441	2015-09-04 04:00:00	30.558	Paul Smith's College VIC	pscvic_1	2015-09-04	2015-09	September	2015	2015.5
442	442	2015-09-04 06:00:00	25.222	Paul Smith's College VIC	pscvic_1	2015-09-04	2015-09	September	2015	2015.5
443	443	2015-09-04 08:00:00	12.304	Paul Smith's College VIC	pscvic_1	2015-09-04	2015-09	September	2015	2015.5
444	444	2015-09-04 10:00:00	9.965	Paul Smith's College VIC	pscvic_1	2015-09-04	2015-09	September	2015	2015.5
445	445	2015-09-05	6.877	Paul Smith's College VIC	pscvic_1	2015-09-05	2015-09	September	2015	2015.5
446	446	2015-09-05 02:00:00	5.962	Paul Smith's College VIC	pscvic_1	2015-09-05	2015-09	September	2015	2015.5
447	447	2015-09-05 04:00:00	4.415	Paul Smith's College VIC	pscvic_1	2015-09-05	2015-09	September	2015	2015.5
448	448	2015-09-05 06:00:00	4.415	Paul Smith's College VIC	pscvic_1	2015-09-05	2015-09	September	2015	2015.5
449	449	2015-09-05 08:00:00	13.269	Paul Smith's College VIC	pscvic_1	2015-09-05	2015-09	September	2015	2015.5
450	450	2015-09-05 10:00:00	25.708	Paul Smith's College VIC	pscvic_1	2015-09-05	2015-09	September	2015	2015.5
451	451	2015-09-05	32.807	Paul Smith's College VIC	pscvic_1	2015-09-05	2015-09	September	2015	2015.5
452	452	2015-09-05 02:00:00	33.743	Paul Smith's College VIC	pscvic_1	2015-09-05	2015-09	September	2015	2015.5
453	453	2015-09-05 04:00:00	33.43	Paul Smith's College VIC	pscvic_1	2015-09-05	2015-09	September	2015	2015.5
454	454	2015-09-05 06:00:00	29.152	Paul Smith's College VIC	pscvic_1	2015-09-05	2015-09	September	2015	2015.5
455	455	2015-09-05 08:00:00	14.9	Paul Smith's College VIC	pscvic_1	2015-09-05	2015-09	September	2015	2015.5
456	456	2015-09-05 10:00:00	11.625	Paul Smith's College VIC	pscvic_1	2015-09-05	2015-09	September	2015	2015.5
457	457	2015-09-06	9.768	Paul Smith's College VIC	pscvic_1	2015-09-06	2015-09	September	2015	2015.5
458	458	2015-09-06 02:00:00	8.779	Paul Smith's College VIC	pscvic_1	2015-09-06	2015-09	September	2015	2015.5
459	459	2015-09-06 04:00:00	7.582	Paul Smith's College VIC	pscvic_1	2015-09-06	2015-09	September	2015	2015.5
460	460	2015-09-06 06:00:00	7.079	Paul Smith's College VIC	pscvic_1	2015-09-06	2015-09	September	2015	2015.5
461	461	2015-09-06 08:00:00	15.282	Paul Smith's College VIC	pscvic_1	2015-09-06	2015-09	September	2015	2015.5
462	462	2015-09-06 10:00:00	26.683	Paul Smith's College VIC	pscvic_1	2015-09-06	2015-09	September	2015	2015.5
463	463	2015-09-06	31.166	Paul Smith's College VIC	pscvic_1	2015-09-06	2015-09	September	2015	2015.5
464	464	2015-09-06 02:00:00	33.848	Paul Smith's College VIC	pscvic_1	2015-09-06	2015-09	September	2015	2015.5
465	465	2015-09-06 04:00:00	33.222	Paul Smith's College VIC	pscvic_1	2015-09-06	2015-09	September	2015	2015.5
466	466	2015-09-06 06:00:00	27.961	Paul Smith's College VIC	pscvic_1	2015-09-06	2015-09	September	2015	2015.5
467	467	2015-09-06 08:00:00	16.999	Paul Smith's College VIC	pscvic_1	2015-09-06	2015-09	September	2015	2015.5
468	468	2015-09-06 10:00:00	15.091	Paul Smith's College VIC	pscvic_1	2015-09-06	2015-09	September	2015	2015.5
469	469	2015-09-07	13.654	Paul Smith's College VIC	pscvic_1	2015-09-07	2015-09	September	2015	2015.5
470	470	2015-09-07 02:00:00	16.427	Paul Smith's College VIC	pscvic_1	2015-09-07	2015-09	September	2015	2015.5
471	471	2015-09-07 04:00:00	13.558	Paul Smith's College VIC	pscvic_1	2015-09-07	2015-09	September	2015	2015.5
472	472	2015-09-07 06:00:00	13.269	Paul Smith's College VIC	pscvic_1	2015-09-07	2015-09	September	2015	2015.5
473	473	2015-09-07 08:00:00	19.948	Paul Smith's College VIC	pscvic_1	2015-09-07	2015-09	September	2015	2015.5
474	474	2015-09-07 10:00:00	28.159	Paul Smith's College VIC	pscvic_1	2015-09-07	2015-09	September	2015	2015.5
475	475	2015-09-07	31.064	Paul Smith's College VIC	pscvic_1	2015-09-07	2015-09	September	2015	2015.5
476	476	2015-09-07 02:00:00	32.704	Paul Smith's College VIC	pscvic_1	2015-09-07	2015-09	September	2015	2015.5
477	477	2015-09-07 04:00:00	32.086	Paul Smith's College VIC	pscvic_1	2015-09-07	2015-09	September	2015	2015.5
478	478	2015-09-07 06:00:00	28.953	Paul Smith's College VIC	pscvic_1	2015-09-07	2015-09	September	2015	2015.5
479	479	2015-09-07 08:00:00	23.966	Paul Smith's College VIC	pscvic_1	2015-09-07	2015-09	September	2015	2015.5
480	480	2015-09-07 10:00:00	23.966	Paul Smith's College VIC	pscvic_1	2015-09-07	2015-09	September	2015	2015.5
481	481	2015-09-08	23.388	Paul Smith's College VIC	pscvic_1	2015-09-08	2015-09	September	2015	2015.5
482	482	2015-09-08 02:00:00	20.138	Paul Smith's College VIC	pscvic_1	2015-09-08	2015-09	September	2015	2015.5
483	483	2015-09-08 04:00:00	19.567	Paul Smith's College VIC	pscvic_1	2015-09-08	2015-09	September	2015	2015.5
484	484	2015-09-08 06:00:00	17.665	Paul Smith's College VIC	pscvic_1	2015-09-08	2015-09	September	2015	2015.5
485	485	2015-09-08 08:00:00	21.091	Paul Smith's College VIC	pscvic_1	2015-09-08	2015-09	September	2015	2015.5
486	486	2015-09-08 10:00:00	23.484	Paul Smith's College VIC	pscvic_1	2015-09-08	2015-09	September	2015	2015.5
487	487	2015-09-08	26	Paul Smith's College VIC	pscvic_1	2015-09-08	2015-09	September	2015	2015.5
488	488	2015-09-08 02:00:00	31.983	Paul Smith's College VIC	pscvic_1	2015-09-08	2015-09	September	2015	2015.5
489	489	2015-09-08 04:00:00	26.585	Paul Smith's College VIC	pscvic_1	2015-09-08	2015-09	September	2015	2015.5
490	490	2015-09-08 06:00:00	23.292	Paul Smith's College VIC	pscvic_1	2015-09-08	2015-09	September	2015	2015.5
491	491	2015-09-08 08:00:00	18.996	Paul Smith's College VIC	pscvic_1	2015-09-08	2015-09	September	2015	2015.5
492	492	2015-09-08 10:00:00	16.332	Paul Smith's College VIC	pscvic_1	2015-09-08	2015-09	September	2015	2015.5
493	493	2015-09-09	16.046	Paul Smith's College VIC	pscvic_1	2015-09-09	2015-09	September	2015	2015.5
494	494	2015-09-09 02:00:00	16.237	Paul Smith's College VIC	pscvic_1	2015-09-09	2015-09	September	2015	2015.5
495	495	2015-09-09 04:00:00	17.76	Paul Smith's College VIC	pscvic_1	2015-09-09	2015-09	September	2015	2015.5
496	496	2015-09-09 06:00:00	17.189	Paul Smith's College VIC	pscvic_1	2015-09-09	2015-09	September	2015	2015.5
497	497	2015-09-09 08:00:00	20.519	Paul Smith's College VIC	pscvic_1	2015-09-09	2015-09	September	2015	2015.5
498	498	2015-09-09 10:00:00	27.862	Paul Smith's College VIC	pscvic_1	2015-09-09	2015-09	September	2015	2015.5
499	499	2015-09-09	31.37	Paul Smith's College VIC	pscvic_1	2015-09-09	2015-09	September	2015	2015.5
500	500	2015-09-09 02:00:00	31.574	Paul Smith's College VIC	pscvic_1	2015-09-09	2015-09	September	2015	2015.5
501	501	2015-09-09 04:00:00	22.429	Paul Smith's College VIC	pscvic_1	2015-09-09	2015-09	September	2015	2015.5
502	502	2015-09-09 06:00:00	22.429	Paul Smith's College VIC	pscvic_1	2015-09-09	2015-09	September	2015	2015.5
503	503	2015-09-09 08:00:00	18.045	Paul Smith's College VIC	pscvic_1	2015-09-09	2015-09	September	2015	2015.5
504	504	2015-09-09 10:00:00	15.951	Paul Smith's College VIC	pscvic_1	2015-09-09	2015-09	September	2015	2015.5
505	505	2015-09-10	15.855	Paul Smith's College VIC	pscvic_1	2015-09-10	2015-09	September	2015	2015.5
506	506	2015-09-10 02:00:00	15.76	Paul Smith's College VIC	pscvic_1	2015-09-10	2015-09	September	2015	2015.5
507	507	2015-09-10 04:00:00	12.401	Paul Smith's College VIC	pscvic_1	2015-09-10	2015-09	September	2015	2015.5
508	508	2015-09-10 06:00:00	11.625	Paul Smith's College VIC	pscvic_1	2015-09-10	2015-09	September	2015	2015.5
509	509	2015-09-10 08:00:00	14.804	Paul Smith's College VIC	pscvic_1	2015-09-10	2015-09	September	2015	2015.5
510	510	2015-09-10 10:00:00	22.525	Paul Smith's College VIC	pscvic_1	2015-09-10	2015-09	September	2015	2015.5
511	511	2015-09-10	22.908	Paul Smith's College VIC	pscvic_1	2015-09-10	2015-09	September	2015	2015.5
512	512	2015-09-10 02:00:00	25.708	Paul Smith's College VIC	pscvic_1	2015-09-10	2015-09	September	2015	2015.5
513	513	2015-09-10 04:00:00	24.448	Paul Smith's College VIC	pscvic_1	2015-09-10	2015-09	September	2015	2015.5
514	514	2015-09-10 06:00:00	18.901	Paul Smith's College VIC	pscvic_1	2015-09-10	2015-09	September	2015	2015.5
515	515	2015-09-10 08:00:00	14.325	Paul Smith's College VIC	pscvic_1	2015-09-10	2015-09	September	2015	2015.5
516	516	2015-09-10 10:00:00	12.207	Paul Smith's College VIC	pscvic_1	2015-09-10	2015-09	September	2015	2015.5
517	517	2015-09-11	11.431	Paul Smith's College VIC	pscvic_1	2015-09-11	2015-09	September	2015	2015.5
518	518	2015-09-11 02:00:00	9.965	Paul Smith's College VIC	pscvic_1	2015-09-11	2015-09	September	2015	2015.5
519	519	2015-09-11 04:00:00	7.582	Paul Smith's College VIC	pscvic_1	2015-09-11	2015-09	September	2015	2015.5
520	520	2015-09-11 06:00:00	5.552	Paul Smith's College VIC	pscvic_1	2015-09-11	2015-09	September	2015	2015.5
521	521	2015-09-11 08:00:00	11.819	Paul Smith's College VIC	pscvic_1	2015-09-11	2015-09	September	2015	2015.5
522	522	2015-09-11 10:00:00	23.292	Paul Smith's College VIC	pscvic_1	2015-09-11	2015-09	September	2015	2015.5
523	523	2015-09-11	27.961	Paul Smith's College VIC	pscvic_1	2015-09-11	2015-09	September	2015	2015.5
524	524	2015-09-11 02:00:00	26.488	Paul Smith's College VIC	pscvic_1	2015-09-11	2015-09	September	2015	2015.5
525	525	2015-09-11 04:00:00	27.173	Paul Smith's College VIC	pscvic_1	2015-09-11	2015-09	September	2015	2015.5
526	526	2015-09-11 06:00:00	22.717	Paul Smith's College VIC	pscvic_1	2015-09-11	2015-09	September	2015	2015.5
527	527	2015-09-11 08:00:00	9.571	Paul Smith's College VIC	pscvic_1	2015-09-11	2015-09	September	2015	2015.5
528	528	2015-09-11 10:00:00	7.079	Paul Smith's College VIC	pscvic_1	2015-09-11	2015-09	September	2015	2015.5
529	529	2015-09-12	5.655	Paul Smith's College VIC	pscvic_1	2015-09-12	2015-09	September	2015	2015.5
530	530	2015-09-12 02:00:00	4.934	Paul Smith's College VIC	pscvic_1	2015-09-12	2015-09	September	2015	2015.5
531	531	2015-09-12 04:00:00	6.573	Paul Smith's College VIC	pscvic_1	2015-09-12	2015-09	September	2015	2015.5
532	532	2015-09-12 06:00:00	7.079	Paul Smith's College VIC	pscvic_1	2015-09-12	2015-09	September	2015	2015.5
533	533	2015-09-12 08:00:00	10.748	Paul Smith's College VIC	pscvic_1	2015-09-12	2015-09	September	2015	2015.5
534	534	2015-09-12 10:00:00	15.187	Paul Smith's College VIC	pscvic_1	2015-09-12	2015-09	September	2015	2015.5
535	535	2015-09-12	17.475	Paul Smith's College VIC	pscvic_1	2015-09-12	2015-09	September	2015	2015.5
536	536	2015-09-12 02:00:00	20.901	Paul Smith's College VIC	pscvic_1	2015-09-12	2015-09	September	2015	2015.5
537	537	2015-09-12 04:00:00	16.427	Paul Smith's College VIC	pscvic_1	2015-09-12	2015-09	September	2015	2015.5
538	538	2015-09-12 06:00:00	15.569	Paul Smith's College VIC	pscvic_1	2015-09-12	2015-09	September	2015	2015.5
539	539	2015-09-12 08:00:00	14.038	Paul Smith's College VIC	pscvic_1	2015-09-12	2015-09	September	2015	2015.5
540	540	2015-09-12 10:00:00	14.421	Paul Smith's College VIC	pscvic_1	2015-09-12	2015-09	September	2015	2015.5
541	541	2015-09-13	14.709	Paul Smith's College VIC	pscvic_1	2015-09-13	2015-09	September	2015	2015.5
542	542	2015-09-13 02:00:00	14.134	Paul Smith's College VIC	pscvic_1	2015-09-13	2015-09	September	2015	2015.5
543	543	2015-09-13 04:00:00	12.98	Paul Smith's College VIC	pscvic_1	2015-09-13	2015-09	September	2015	2015.5
544	544	2015-09-13 06:00:00	11.334	Paul Smith's College VIC	pscvic_1	2015-09-13	2015-09	September	2015	2015.5
545	545	2015-09-13 08:00:00	13.558	Paul Smith's College VIC	pscvic_1	2015-09-13	2015-09	September	2015	2015.5
546	546	2015-09-13 10:00:00	17.57	Paul Smith's College VIC	pscvic_1	2015-09-13	2015-09	September	2015	2015.5
547	547	2015-09-13	22.908	Paul Smith's College VIC	pscvic_1	2015-09-13	2015-09	September	2015	2015.5
548	548	2015-09-13 02:00:00	20.043	Paul Smith's College VIC	pscvic_1	2015-09-13	2015-09	September	2015	2015.5
549	549	2015-09-13 04:00:00	19.948	Paul Smith's College VIC	pscvic_1	2015-09-13	2015-09	September	2015	2015.5
550	550	2015-09-13 06:00:00	15.76	Paul Smith's College VIC	pscvic_1	2015-09-13	2015-09	September	2015	2015.5
551	551	2015-09-13 08:00:00	13.173	Paul Smith's College VIC	pscvic_1	2015-09-13	2015-09	September	2015	2015.5
552	552	2015-09-13 10:00:00	12.401	Paul Smith's College VIC	pscvic_1	2015-09-13	2015-09	September	2015	2015.5
553	553	2015-09-14	11.722	Paul Smith's College VIC	pscvic_1	2015-09-14	2015-09	September	2015	2015.5
554	554	2015-09-14 02:00:00	11.625	Paul Smith's College VIC	pscvic_1	2015-09-14	2015-09	September	2015	2015.5
555	555	2015-09-14 04:00:00	11.139	Paul Smith's College VIC	pscvic_1	2015-09-14	2015-09	September	2015	2015.5
556	556	2015-09-14 06:00:00	11.041	Paul Smith's College VIC	pscvic_1	2015-09-14	2015-09	September	2015	2015.5
557	557	2015-09-14 08:00:00	11.819	Paul Smith's College VIC	pscvic_1	2015-09-14	2015-09	September	2015	2015.5
558	558	2015-09-14 10:00:00	14.325	Paul Smith's College VIC	pscvic_1	2015-09-14	2015-09	September	2015	2015.5
559	559	2015-09-14	13.654	Paul Smith's College VIC	pscvic_1	2015-09-14	2015-09	September	2015	2015.5
560	560	2015-09-14 02:00:00	16.618	Paul Smith's College VIC	pscvic_1	2015-09-14	2015-09	September	2015	2015.5
561	561	2015-09-14 04:00:00	19.472	Paul Smith's College VIC	pscvic_1	2015-09-14	2015-09	September	2015	2015.5
562	562	2015-09-14 06:00:00	16.903	Paul Smith's College VIC	pscvic_1	2015-09-14	2015-09	September	2015	2015.5
563	563	2015-09-14 08:00:00	13.269	Paul Smith's College VIC	pscvic_1	2015-09-14	2015-09	September	2015	2015.5
564	564	2015-09-14 10:00:00	12.98	Paul Smith's College VIC	pscvic_1	2015-09-14	2015-09	September	2015	2015.5
565	565	2015-09-15	12.98	Paul Smith's College VIC	pscvic_1	2015-09-15	2015-09	September	2015	2015.5
566	566	2015-09-15 02:00:00	12.11	Paul Smith's College VIC	pscvic_1	2015-09-15	2015-09	September	2015	2015.5
567	567	2015-09-15 04:00:00	5.86	Paul Smith's College VIC	pscvic_1	2015-09-15	2015-09	September	2015	2015.5
568	568	2015-09-15 06:00:00	5.037	Paul Smith's College VIC	pscvic_1	2015-09-15	2015-09	September	2015	2015.5
569	569	2015-09-15 08:00:00	11.722	Paul Smith's College VIC	pscvic_1	2015-09-15	2015-09	September	2015	2015.5
570	570	2015-09-15 10:00:00	21.473	Paul Smith's College VIC	pscvic_1	2015-09-15	2015-09	September	2015	2015.5
571	571	2015-09-15	26.39	Paul Smith's College VIC	pscvic_1	2015-09-15	2015-09	September	2015	2015.5
572	572	2015-09-15 02:00:00	27.862	Paul Smith's College VIC	pscvic_1	2015-09-15	2015-09	September	2015	2015.5
573	573	2015-09-15 04:00:00	27.764	Paul Smith's College VIC	pscvic_1	2015-09-15	2015-09	September	2015	2015.5
574	574	2015-09-15 06:00:00	23.869	Paul Smith's College VIC	pscvic_1	2015-09-15	2015-09	September	2015	2015.5
575	575	2015-09-15 08:00:00	12.013	Paul Smith's College VIC	pscvic_1	2015-09-15	2015-09	September	2015	2015.5
576	576	2015-09-15 10:00:00	8.382	Paul Smith's College VIC	pscvic_1	2015-09-15	2015-09	September	2015	2015.5
577	577	2015-09-16	7.079	Paul Smith's College VIC	pscvic_1	2015-09-16	2015-09	September	2015	2015.5
578	578	2015-09-16 02:00:00	5.757	Paul Smith's College VIC	pscvic_1	2015-09-16	2015-09	September	2015	2015.5
579	579	2015-09-16 04:00:00	5.141	Paul Smith's College VIC	pscvic_1	2015-09-16	2015-09	September	2015	2015.5
580	580	2015-09-16 06:00:00	5.141	Paul Smith's College VIC	pscvic_1	2015-09-16	2015-09	September	2015	2015.5
581	581	2015-09-16 08:00:00	11.528	Paul Smith's College VIC	pscvic_1	2015-09-16	2015-09	September	2015	2015.5
582	582	2015-09-16 10:00:00	23.773	Paul Smith's College VIC	pscvic_1	2015-09-16	2015-09	September	2015	2015.5
583	583	2015-09-16	29.652	Paul Smith's College VIC	pscvic_1	2015-09-16	2015-09	September	2015	2015.5
584	584	2015-09-16 02:00:00	31.88	Paul Smith's College VIC	pscvic_1	2015-09-16	2015-09	September	2015	2015.5
585	585	2015-09-16 04:00:00	31.983	Paul Smith's College VIC	pscvic_1	2015-09-16	2015-09	September	2015	2015.5
586	586	2015-09-16 06:00:00	26.683	Paul Smith's College VIC	pscvic_1	2015-09-16	2015-09	September	2015	2015.5
587	587	2015-09-16 08:00:00	14.517	Paul Smith's College VIC	pscvic_1	2015-09-16	2015-09	September	2015	2015.5
588	588	2015-09-16 10:00:00	11.334	Paul Smith's College VIC	pscvic_1	2015-09-16	2015-09	September	2015	2015.5
589	589	2015-09-17	9.472	Paul Smith's College VIC	pscvic_1	2015-09-17	2015-09	September	2015	2015.5
590	590	2015-09-17 02:00:00	8.082	Paul Smith's College VIC	pscvic_1	2015-09-17	2015-09	September	2015	2015.5
591	591	2015-09-17 04:00:00	8.779	Paul Smith's College VIC	pscvic_1	2015-09-17	2015-09	September	2015	2015.5
592	592	2015-09-17 06:00:00	9.077	Paul Smith's College VIC	pscvic_1	2015-09-17	2015-09	September	2015	2015.5
593	593	2015-09-17 08:00:00	12.11	Paul Smith's College VIC	pscvic_1	2015-09-17	2015-09	September	2015	2015.5
594	594	2015-09-17 10:00:00	24.641	Paul Smith's College VIC	pscvic_1	2015-09-17	2015-09	September	2015	2015.5
595	595	2015-09-17	29.352	Paul Smith's College VIC	pscvic_1	2015-09-17	2015-09	September	2015	2015.5
596	596	2015-09-17 02:00:00	30.659	Paul Smith's College VIC	pscvic_1	2015-09-17	2015-09	September	2015	2015.5
597	597	2015-09-17 04:00:00	30.054	Paul Smith's College VIC	pscvic_1	2015-09-17	2015-09	September	2015	2015.5
598	598	2015-09-17 06:00:00	25.902	Paul Smith's College VIC	pscvic_1	2015-09-17	2015-09	September	2015	2015.5
599	599	2015-09-17 08:00:00	13.846	Paul Smith's College VIC	pscvic_1	2015-09-17	2015-09	September	2015	2015.5
600	600	2015-09-17 10:00:00	10.748	Paul Smith's College VIC	pscvic_1	2015-09-17	2015-09	September	2015	2015.5
601	601	2015-09-18	8.282	Paul Smith's College VIC	pscvic_1	2015-09-18	2015-09	September	2015	2015.5
602	602	2015-09-18 02:00:00	6.674	Paul Smith's College VIC	pscvic_1	2015-09-18	2015-09	September	2015	2015.5
603	603	2015-09-18 04:00:00	5.552	Paul Smith's College VIC	pscvic_1	2015-09-18	2015-09	September	2015	2015.5
604	604	2015-09-18 06:00:00	5.244	Paul Smith's College VIC	pscvic_1	2015-09-18	2015-09	September	2015	2015.5
605	605	2015-09-18 08:00:00	12.013	Paul Smith's College VIC	pscvic_1	2015-09-18	2015-09	September	2015	2015.5
606	606	2015-09-18 10:00:00	25.028	Paul Smith's College VIC	pscvic_1	2015-09-18	2015-09	September	2015	2015.5
607	607	2015-09-18	29.552	Paul Smith's College VIC	pscvic_1	2015-09-18	2015-09	September	2015	2015.5
608	608	2015-09-18 02:00:00	30.659	Paul Smith's College VIC	pscvic_1	2015-09-18	2015-09	September	2015	2015.5
609	609	2015-09-18 04:00:00	30.356	Paul Smith's College VIC	pscvic_1	2015-09-18	2015-09	September	2015	2015.5
610	610	2015-09-18 06:00:00	23.004	Paul Smith's College VIC	pscvic_1	2015-09-18	2015-09	September	2015	2015.5
611	611	2015-09-18 08:00:00	12.11	Paul Smith's College VIC	pscvic_1	2015-09-18	2015-09	September	2015	2015.5
612	612	2015-09-18 10:00:00	10.455	Paul Smith's College VIC	pscvic_1	2015-09-18	2015-09	September	2015	2015.5
613	613	2015-09-19	9.866	Paul Smith's College VIC	pscvic_1	2015-09-19	2015-09	September	2015	2015.5
614	614	2015-09-19 02:00:00	10.944	Paul Smith's College VIC	pscvic_1	2015-09-19	2015-09	September	2015	2015.5
615	615	2015-09-19 04:00:00	11.041	Paul Smith's College VIC	pscvic_1	2015-09-19	2015-09	September	2015	2015.5
616	616	2015-09-19 06:00:00	12.207	Paul Smith's College VIC	pscvic_1	2015-09-19	2015-09	September	2015	2015.5
617	617	2015-09-19 08:00:00	13.654	Paul Smith's College VIC	pscvic_1	2015-09-19	2015-09	September	2015	2015.5
618	618	2015-09-19 10:00:00	25.416	Paul Smith's College VIC	pscvic_1	2015-09-19	2015-09	September	2015	2015.5
619	619	2015-09-19	28.258	Paul Smith's College VIC	pscvic_1	2015-09-19	2015-09	September	2015	2015.5
620	620	2015-09-19 02:00:00	27.075	Paul Smith's College VIC	pscvic_1	2015-09-19	2015-09	September	2015	2015.5
621	621	2015-09-19 04:00:00	21.76	Paul Smith's College VIC	pscvic_1	2015-09-19	2015-09	September	2015	2015.5
622	622	2015-09-19 06:00:00	20.805	Paul Smith's College VIC	pscvic_1	2015-09-19	2015-09	September	2015	2015.5
623	623	2015-09-19 08:00:00	17.95	Paul Smith's College VIC	pscvic_1	2015-09-19	2015-09	September	2015	2015.5
624	624	2015-09-19 10:00:00	17.665	Paul Smith's College VIC	pscvic_1	2015-09-19	2015-09	September	2015	2015.5
625	625	2015-09-20	16.903	Paul Smith's College VIC	pscvic_1	2015-09-20	2015-09	September	2015	2015.5
626	626	2015-09-20 02:00:00	9.965	Paul Smith's College VIC	pscvic_1	2015-09-20	2015-09	September	2015	2015.5
627	627	2015-09-20 04:00:00	8.779	Paul Smith's College VIC	pscvic_1	2015-09-20	2015-09	September	2015	2015.5
628	628	2015-09-20 06:00:00	8.082	Paul Smith's College VIC	pscvic_1	2015-09-20	2015-09	September	2015	2015.5
629	629	2015-09-20 08:00:00	8.581	Paul Smith's College VIC	pscvic_1	2015-09-20	2015-09	September	2015	2015.5
630	630	2015-09-20 10:00:00	11.236	Paul Smith's College VIC	pscvic_1	2015-09-20	2015-09	September	2015	2015.5
631	631	2015-09-20	17.189	Paul Smith's College VIC	pscvic_1	2015-09-20	2015-09	September	2015	2015.5
632	632	2015-09-20 02:00:00	19.758	Paul Smith's College VIC	pscvic_1	2015-09-20	2015-09	September	2015	2015.5
633	633	2015-09-20 04:00:00	19.567	Paul Smith's College VIC	pscvic_1	2015-09-20	2015-09	September	2015	2015.5
634	634	2015-09-20 06:00:00	15.282	Paul Smith's College VIC	pscvic_1	2015-09-20	2015-09	September	2015	2015.5
635	635	2015-09-20 08:00:00	2.624	Paul Smith's College VIC	pscvic_1	2015-09-20	2015-09	September	2015	2015.5
636	636	2015-09-20 10:00:00	0.232	Paul Smith's College VIC	pscvic_1	2015-09-20	2015-09	September	2015	2015.5
637	637	2015-09-21	2.41	Paul Smith's College VIC	pscvic_1	2015-09-21	2015-09	September	2015	2015.5
638	638	2015-09-21 02:00:00	1.98	Paul Smith's College VIC	pscvic_1	2015-09-21	2015-09	September	2015	2015.5
639	639	2015-09-21 04:00:00	1.33	Paul Smith's College VIC	pscvic_1	2015-09-21	2015-09	September	2015	2015.5
640	640	2015-09-21 06:00:00	1.439	Paul Smith's College VIC	pscvic_1	2015-09-21	2015-09	September	2015	2015.5
641	641	2015-09-21 08:00:00	4.415	Paul Smith's College VIC	pscvic_1	2015-09-21	2015-09	September	2015	2015.5
642	642	2015-09-21 10:00:00	15.569	Paul Smith's College VIC	pscvic_1	2015-09-21	2015-09	September	2015	2015.5
643	643	2015-09-21	20.043	Paul Smith's College VIC	pscvic_1	2015-09-21	2015-09	September	2015	2015.5
644	644	2015-09-21 02:00:00	23.388	Paul Smith's College VIC	pscvic_1	2015-09-21	2015-09	September	2015	2015.5
645	645	2015-09-21 04:00:00	22.621	Paul Smith's College VIC	pscvic_1	2015-09-21	2015-09	September	2015	2015.5
646	646	2015-09-21 06:00:00	15.473	Paul Smith's College VIC	pscvic_1	2015-09-21	2015-09	September	2015	2015.5
647	647	2015-09-21 08:00:00	7.582	Paul Smith's College VIC	pscvic_1	2015-09-21	2015-09	September	2015	2015.5
648	648	2015-09-21 10:00:00	5.037	Paul Smith's College VIC	pscvic_1	2015-09-21	2015-09	September	2015	2015.5
649	649	2015-09-22	3.367	Paul Smith's College VIC	pscvic_1	2015-09-22	2015-09	September	2015	2015.5
650	650	2015-09-22 02:00:00	4.727	Paul Smith's College VIC	pscvic_1	2015-09-22	2015-09	September	2015	2015.5
651	651	2015-09-22 04:00:00	5.244	Paul Smith's College VIC	pscvic_1	2015-09-22	2015-09	September	2015	2015.5
652	652	2015-09-22 06:00:00	5.655	Paul Smith's College VIC	pscvic_1	2015-09-22	2015-09	September	2015	2015.5
653	653	2015-09-22 08:00:00	6.674	Paul Smith's College VIC	pscvic_1	2015-09-22	2015-09	September	2015	2015.5
654	654	2015-09-22 10:00:00	18.045	Paul Smith's College VIC	pscvic_1	2015-09-22	2015-09	September	2015	2015.5
655	655	2015-09-22	23.966	Paul Smith's College VIC	pscvic_1	2015-09-22	2015-09	September	2015	2015.5
656	656	2015-09-22 02:00:00	25.125	Paul Smith's College VIC	pscvic_1	2015-09-22	2015-09	September	2015	2015.5
657	657	2015-09-22 04:00:00	25.513	Paul Smith's College VIC	pscvic_1	2015-09-22	2015-09	September	2015	2015.5
658	658	2015-09-22 06:00:00	20.043	Paul Smith's College VIC	pscvic_1	2015-09-22	2015-09	September	2015	2015.5
659	659	2015-09-22 08:00:00	5.45	Paul Smith's College VIC	pscvic_1	2015-09-22	2015-09	September	2015	2015.5
660	660	2015-09-22 10:00:00	2.303	Paul Smith's College VIC	pscvic_1	2015-09-22	2015-09	September	2015	2015.5
661	661	2015-09-23	0.343	Paul Smith's College VIC	pscvic_1	2015-09-23	2015-09	September	2015	2015.5
662	662	2015-09-23 02:00:00	-0.549	Paul Smith's College VIC	pscvic_1	2015-09-23	2015-09	September	2015	2015.5
663	663	2015-09-23 04:00:00	-1.001	Paul Smith's College VIC	pscvic_1	2015-09-23	2015-09	September	2015	2015.5
664	664	2015-09-23 06:00:00	-1.114	Paul Smith's College VIC	pscvic_1	2015-09-23	2015-09	September	2015	2015.5
665	665	2015-09-23 08:00:00	3.683	Paul Smith's College VIC	pscvic_1	2015-09-23	2015-09	September	2015	2015.5
666	666	2015-09-23 10:00:00	18.901	Paul Smith's College VIC	pscvic_1	2015-09-23	2015-09	September	2015	2015.5
667	667	2015-09-23	24.931	Paul Smith's College VIC	pscvic_1	2015-09-23	2015-09	September	2015	2015.5
668	668	2015-09-23 02:00:00	26.195	Paul Smith's College VIC	pscvic_1	2015-09-23	2015-09	September	2015	2015.5
669	669	2015-09-23 04:00:00	26.39	Paul Smith's College VIC	pscvic_1	2015-09-23	2015-09	September	2015	2015.5
670	670	2015-09-23 06:00:00	20.805	Paul Smith's College VIC	pscvic_1	2015-09-23	2015-09	September	2015	2015.5
671	671	2015-09-23 08:00:00	8.978	Paul Smith's College VIC	pscvic_1	2015-09-23	2015-09	September	2015	2015.5
672	672	2015-09-23 10:00:00	6.877	Paul Smith's College VIC	pscvic_1	2015-09-23	2015-09	September	2015	2015.5
673	673	2015-09-24	5.552	Paul Smith's College VIC	pscvic_1	2015-09-24	2015-09	September	2015	2015.5
674	674	2015-09-24 02:00:00	8.481	Paul Smith's College VIC	pscvic_1	2015-09-24	2015-09	September	2015	2015.5
675	675	2015-09-24 04:00:00	7.782	Paul Smith's College VIC	pscvic_1	2015-09-24	2015-09	September	2015	2015.5
676	676	2015-09-24 06:00:00	7.782	Paul Smith's College VIC	pscvic_1	2015-09-24	2015-09	September	2015	2015.5
677	677	2015-09-24 08:00:00	10.161	Paul Smith's College VIC	pscvic_1	2015-09-24	2015-09	September	2015	2015.5
678	678	2015-09-24 10:00:00	20.71	Paul Smith's College VIC	pscvic_1	2015-09-24	2015-09	September	2015	2015.5
679	679	2015-09-24	23.677	Paul Smith's College VIC	pscvic_1	2015-09-24	2015-09	September	2015	2015.5
680	680	2015-09-24 02:00:00	24.448	Paul Smith's College VIC	pscvic_1	2015-09-24	2015-09	September	2015	2015.5
681	681	2015-09-24 04:00:00	23.677	Paul Smith's College VIC	pscvic_1	2015-09-24	2015-09	September	2015	2015.5
682	682	2015-09-24 06:00:00	17.57	Paul Smith's College VIC	pscvic_1	2015-09-24	2015-09	September	2015	2015.5
683	683	2015-09-24 08:00:00	7.179	Paul Smith's College VIC	pscvic_1	2015-09-24	2015-09	September	2015	2015.5
684	684	2015-09-24 10:00:00	5.347	Paul Smith's College VIC	pscvic_1	2015-09-24	2015-09	September	2015	2015.5
685	685	2015-09-25	2.73	Paul Smith's College VIC	pscvic_1	2015-09-25	2015-09	September	2015	2015.5
686	686	2015-09-25 02:00:00	-0.102	Paul Smith's College VIC	pscvic_1	2015-09-25	2015-09	September	2015	2015.5
687	687	2015-09-25 04:00:00	1.439	Paul Smith's College VIC	pscvic_1	2015-09-25	2015-09	September	2015	2015.5
688	688	2015-09-25 06:00:00	0.893	Paul Smith's College VIC	pscvic_1	2015-09-25	2015-09	September	2015	2015.5
689	689	2015-09-25 08:00:00	3.261	Paul Smith's College VIC	pscvic_1	2015-09-25	2015-09	September	2015	2015.5
690	690	2015-09-25 10:00:00	13.942	Paul Smith's College VIC	pscvic_1	2015-09-25	2015-09	September	2015	2015.5
691	691	2015-09-25	20.805	Paul Smith's College VIC	pscvic_1	2015-09-25	2015-09	September	2015	2015.5
692	692	2015-09-25 02:00:00	19.377	Paul Smith's College VIC	pscvic_1	2015-09-25	2015-09	September	2015	2015.5
693	693	2015-09-25 04:00:00	19.092	Paul Smith's College VIC	pscvic_1	2015-09-25	2015-09	September	2015	2015.5
694	694	2015-09-25 06:00:00	17.094	Paul Smith's College VIC	pscvic_1	2015-09-25	2015-09	September	2015	2015.5
695	695	2015-09-25 08:00:00	11.236	Paul Smith's College VIC	pscvic_1	2015-09-25	2015-09	September	2015	2015.5
696	696	2015-09-25 10:00:00	3.261	Paul Smith's College VIC	pscvic_1	2015-09-25	2015-09	September	2015	2015.5
697	697	2015-09-26	0.453	Paul Smith's College VIC	pscvic_1	2015-09-26	2015-09	September	2015	2015.5
698	698	2015-09-26 02:00:00	-1.114	Paul Smith's College VIC	pscvic_1	2015-09-26	2015-09	September	2015	2015.5
699	699	2015-09-26 04:00:00	-2.494	Paul Smith's College VIC	pscvic_1	2015-09-26	2015-09	September	2015	2015.5
700	700	2015-09-26 06:00:00	-3.911	Paul Smith's College VIC	pscvic_1	2015-09-26	2015-09	September	2015	2015.5
701	701	2015-09-26 08:00:00	2.088	Paul Smith's College VIC	pscvic_1	2015-09-26	2015-09	September	2015	2015.5
702	702	2015-09-26 10:00:00	16.237	Paul Smith's College VIC	pscvic_1	2015-09-26	2015-09	September	2015	2015.5
703	703	2015-09-26	19.948	Paul Smith's College VIC	pscvic_1	2015-09-26	2015-09	September	2015	2015.5
704	704	2015-09-26 02:00:00	23.388	Paul Smith's College VIC	pscvic_1	2015-09-26	2015-09	September	2015	2015.5
705	705	2015-09-26 04:00:00	23.677	Paul Smith's College VIC	pscvic_1	2015-09-26	2015-09	September	2015	2015.5
706	706	2015-09-26 06:00:00	17.475	Paul Smith's College VIC	pscvic_1	2015-09-26	2015-09	September	2015	2015.5
707	707	2015-09-26 08:00:00	3.261	Paul Smith's College VIC	pscvic_1	2015-09-26	2015-09	September	2015	2015.5
708	708	2015-09-26 10:00:00	-0.437	Paul Smith's College VIC	pscvic_1	2015-09-26	2015-09	September	2015	2015.5
709	709	2015-09-27	-1.799	Paul Smith's College VIC	pscvic_1	2015-09-27	2015-09	September	2015	2015.5
710	710	2015-09-27 02:00:00	-2.962	Paul Smith's College VIC	pscvic_1	2015-09-27	2015-09	September	2015	2015.5
711	711	2015-09-27 04:00:00	-3.316	Paul Smith's College VIC	pscvic_1	2015-09-27	2015-09	September	2015	2015.5
712	712	2015-09-27 06:00:00	-2.962	Paul Smith's College VIC	pscvic_1	2015-09-27	2015-09	September	2015	2015.5
713	713	2015-09-27 08:00:00	2.943	Paul Smith's College VIC	pscvic_1	2015-09-27	2015-09	September	2015	2015.5
714	714	2015-09-27 10:00:00	18.806	Paul Smith's College VIC	pscvic_1	2015-09-27	2015-09	September	2015	2015.5
715	715	2015-09-27	23.677	Paul Smith's College VIC	pscvic_1	2015-09-27	2015-09	September	2015	2015.5
716	716	2015-09-27 02:00:00	25.61	Paul Smith's College VIC	pscvic_1	2015-09-27	2015-09	September	2015	2015.5
717	717	2015-09-27 04:00:00	25.222	Paul Smith's College VIC	pscvic_1	2015-09-27	2015-09	September	2015	2015.5
718	718	2015-09-27 06:00:00	20.901	Paul Smith's College VIC	pscvic_1	2015-09-27	2015-09	September	2015	2015.5
719	719	2015-09-27 08:00:00	6.166	Paul Smith's College VIC	pscvic_1	2015-09-27	2015-09	September	2015	2015.5
720	720	2015-09-27 10:00:00	4.831	Paul Smith's College VIC	pscvic_1	2015-09-27	2015-09	September	2015	2015.5
721	721	2015-09-28	8.082	Paul Smith's College VIC	pscvic_1	2015-09-28	2015-09	September	2015	2015.5
722	722	2015-09-28 02:00:00	12.207	Paul Smith's College VIC	pscvic_1	2015-09-28	2015-09	September	2015	2015.5
723	723	2015-09-28 04:00:00	13.076	Paul Smith's College VIC	pscvic_1	2015-09-28	2015-09	September	2015	2015.5
724	724	2015-09-28 06:00:00	13.269	Paul Smith's College VIC	pscvic_1	2015-09-28	2015-09	September	2015	2015.5
725	725	2015-09-28 08:00:00	14.325	Paul Smith's College VIC	pscvic_1	2015-09-28	2015-09	September	2015	2015.5
726	726	2015-09-28 10:00:00	22.046	Paul Smith's College VIC	pscvic_1	2015-09-28	2015-09	September	2015	2015.5
727	727	2015-09-28	20.424	Paul Smith's College VIC	pscvic_1	2015-09-28	2015-09	September	2015	2015.5
728	728	2015-09-28 02:00:00	19.853	Paul Smith's College VIC	pscvic_1	2015-09-28	2015-09	September	2015	2015.5
729	729	2015-09-28 04:00:00	19.758	Paul Smith's College VIC	pscvic_1	2015-09-28	2015-09	September	2015	2015.5
730	730	2015-09-28 06:00:00	18.996	Paul Smith's College VIC	pscvic_1	2015-09-28	2015-09	September	2015	2015.5
731	731	2015-09-28 08:00:00	16.903	Paul Smith's College VIC	pscvic_1	2015-09-28	2015-09	September	2015	2015.5
732	732	2015-09-28 10:00:00	17.094	Paul Smith's College VIC	pscvic_1	2015-09-28	2015-09	September	2015	2015.5
733	733	2015-09-29	16.523	Paul Smith's College VIC	pscvic_1	2015-09-29	2015-09	September	2015	2015.5
734	734	2015-09-29 02:00:00	16.618	Paul Smith's College VIC	pscvic_1	2015-09-29	2015-09	September	2015	2015.5
735	735	2015-09-29 04:00:00	16.903	Paul Smith's College VIC	pscvic_1	2015-09-29	2015-09	September	2015	2015.5
736	736	2015-09-29 06:00:00	16.903	Paul Smith's College VIC	pscvic_1	2015-09-29	2015-09	September	2015	2015.5
737	737	2015-09-29 08:00:00	17.284	Paul Smith's College VIC	pscvic_1	2015-09-29	2015-09	September	2015	2015.5
738	738	2015-09-29 10:00:00	18.996	Paul Smith's College VIC	pscvic_1	2015-09-29	2015-09	September	2015	2015.5
739	739	2015-09-29	19.948	Paul Smith's College VIC	pscvic_1	2015-09-29	2015-09	September	2015	2015.5
740	740	2015-09-29 02:00:00	19.662	Paul Smith's College VIC	pscvic_1	2015-09-29	2015-09	September	2015	2015.5
741	741	2015-09-29 04:00:00	21.378	Paul Smith's College VIC	pscvic_1	2015-09-29	2015-09	September	2015	2015.5
742	742	2015-09-29 06:00:00	18.521	Paul Smith's College VIC	pscvic_1	2015-09-29	2015-09	September	2015	2015.5
743	743	2015-09-29 08:00:00	16.332	Paul Smith's College VIC	pscvic_1	2015-09-29	2015-09	September	2015	2015.5
744	744	2015-09-29 10:00:00	14.325	Paul Smith's College VIC	pscvic_1	2015-09-29	2015-09	September	2015	2015.5
745	745	2015-09-30	13.846	Paul Smith's College VIC	pscvic_1	2015-09-30	2015-09	September	2015	2015.5
746	746	2015-09-30 02:00:00	11.528	Paul Smith's College VIC	pscvic_1	2015-09-30	2015-09	September	2015	2015.5
747	747	2015-09-30 04:00:00	9.571	Paul Smith's College VIC	pscvic_1	2015-09-30	2015-09	September	2015	2015.5
748	748	2015-09-30 06:00:00	9.571	Paul Smith's College VIC	pscvic_1	2015-09-30	2015-09	September	2015	2015.5
749	749	2015-09-30 08:00:00	9.866	Paul Smith's College VIC	pscvic_1	2015-09-30	2015-09	September	2015	2015.5
750	750	2015-09-30 10:00:00	9.373	Paul Smith's College VIC	pscvic_1	2015-09-30	2015-09	September	2015	2015.5
751	751	2015-09-30	8.082	Paul Smith's College VIC	pscvic_1	2015-09-30	2015-09	September	2015	2015.5
752	752	2015-09-30 02:00:00	8.382	Paul Smith's College VIC	pscvic_1	2015-09-30	2015-09	September	2015	2015.5
753	753	2015-09-30 04:00:00	7.381	Paul Smith's College VIC	pscvic_1	2015-09-30	2015-09	September	2015	2015.5
754	754	2015-09-30 06:00:00	6.471	Paul Smith's College VIC	pscvic_1	2015-09-30	2015-09	September	2015	2015.5
755	755	2015-09-30 08:00:00	6.268	Paul Smith's College VIC	pscvic_1	2015-09-30	2015-09	September	2015	2015.5
756	756	2015-09-30 10:00:00	5.962	Paul Smith's College VIC	pscvic_1	2015-09-30	2015-09	September	2015	2015.5
757	757	2015-10-01	5.655	Paul Smith's College VIC	pscvic_1	2015-10-01	2015-10	October	2015	2015.75
758	758	2015-10-01 02:00:00	5.141	Paul Smith's College VIC	pscvic_1	2015-10-01	2015-10	October	2015	2015.75
759	759	2015-10-01 04:00:00	-0.102	Paul Smith's College VIC	pscvic_1	2015-10-01	2015-10	October	2015	2015.75
760	760	2015-10-01 06:00:00	-2.261	Paul Smith's College VIC	pscvic_1	2015-10-01	2015-10	October	2015	2015.75
761	761	2015-10-01 08:00:00	-0.213	Paul Smith's College VIC	pscvic_1	2015-10-01	2015-10	October	2015	2015.75
762	762	2015-10-01 10:00:00	10.748	Paul Smith's College VIC	pscvic_1	2015-10-01	2015-10	October	2015	2015.75
763	763	2015-10-01	13.654	Paul Smith's College VIC	pscvic_1	2015-10-01	2015-10	October	2015	2015.75
764	764	2015-10-01 02:00:00	14.804	Paul Smith's College VIC	pscvic_1	2015-10-01	2015-10	October	2015	2015.75
765	765	2015-10-01 04:00:00	11.528	Paul Smith's College VIC	pscvic_1	2015-10-01	2015-10	October	2015	2015.75
766	766	2015-10-01 06:00:00	8.879	Paul Smith's College VIC	pscvic_1	2015-10-01	2015-10	October	2015	2015.75
767	767	2015-10-01 08:00:00	3.998	Paul Smith's College VIC	pscvic_1	2015-10-01	2015-10	October	2015	2015.75
768	768	2015-10-01 10:00:00	-1.914	Paul Smith's College VIC	pscvic_1	2015-10-01	2015-10	October	2015	2015.75
769	769	2015-10-02	3.261	Paul Smith's College VIC	pscvic_1	2015-10-02	2015-10	October	2015	2015.75
770	770	2015-10-02 02:00:00	-1.341	Paul Smith's College VIC	pscvic_1	2015-10-02	2015-10	October	2015	2015.75
771	771	2015-10-02 04:00:00	-0.774	Paul Smith's College VIC	pscvic_1	2015-10-02	2015-10	October	2015	2015.75
772	772	2015-10-02 06:00:00	-2.145	Paul Smith's College VIC	pscvic_1	2015-10-02	2015-10	October	2015	2015.75
773	773	2015-10-02 08:00:00	0.01	Paul Smith's College VIC	pscvic_1	2015-10-02	2015-10	October	2015	2015.75
774	774	2015-10-02 10:00:00	7.481	Paul Smith's College VIC	pscvic_1	2015-10-02	2015-10	October	2015	2015.75
775	775	2015-10-02	8.779	Paul Smith's College VIC	pscvic_1	2015-10-02	2015-10	October	2015	2015.75
776	776	2015-10-02 02:00:00	9.176	Paul Smith's College VIC	pscvic_1	2015-10-02	2015-10	October	2015	2015.75
777	777	2015-10-02 04:00:00	8.182	Paul Smith's College VIC	pscvic_1	2015-10-02	2015-10	October	2015	2015.75
778	778	2015-10-02 06:00:00	6.064	Paul Smith's College VIC	pscvic_1	2015-10-02	2015-10	October	2015	2015.75
779	779	2015-10-02 08:00:00	2.837	Paul Smith's College VIC	pscvic_1	2015-10-02	2015-10	October	2015	2015.75
780	780	2015-10-02 10:00:00	2.73	Paul Smith's College VIC	pscvic_1	2015-10-02	2015-10	October	2015	2015.75
781	781	2015-10-03	1.439	Paul Smith's College VIC	pscvic_1	2015-10-03	2015-10	October	2015	2015.75
782	782	2015-10-03 02:00:00	1.764	Paul Smith's College VIC	pscvic_1	2015-10-03	2015-10	October	2015	2015.75
783	783	2015-10-03 04:00:00	1.656	Paul Smith's College VIC	pscvic_1	2015-10-03	2015-10	October	2015	2015.75
784	784	2015-10-03 06:00:00	0.784	Paul Smith's College VIC	pscvic_1	2015-10-03	2015-10	October	2015	2015.75
785	785	2015-10-03 08:00:00	2.41	Paul Smith's College VIC	pscvic_1	2015-10-03	2015-10	October	2015	2015.75
786	786	2015-10-03 10:00:00	5.552	Paul Smith's College VIC	pscvic_1	2015-10-03	2015-10	October	2015	2015.75
787	787	2015-10-03	11.625	Paul Smith's College VIC	pscvic_1	2015-10-03	2015-10	October	2015	2015.75
788	788	2015-10-03 02:00:00	10.846	Paul Smith's College VIC	pscvic_1	2015-10-03	2015-10	October	2015	2015.75
789	789	2015-10-03 04:00:00	12.207	Paul Smith's College VIC	pscvic_1	2015-10-03	2015-10	October	2015	2015.75
790	790	2015-10-03 06:00:00	9.077	Paul Smith's College VIC	pscvic_1	2015-10-03	2015-10	October	2015	2015.75
791	791	2015-10-03 08:00:00	4.519	Paul Smith's College VIC	pscvic_1	2015-10-03	2015-10	October	2015	2015.75
792	792	2015-10-03 10:00:00	4.934	Paul Smith's College VIC	pscvic_1	2015-10-03	2015-10	October	2015	2015.75
793	793	2015-10-04	4.102	Paul Smith's College VIC	pscvic_1	2015-10-04	2015-10	October	2015	2015.75
794	794	2015-10-04 02:00:00	3.578	Paul Smith's College VIC	pscvic_1	2015-10-04	2015-10	October	2015	2015.75
795	795	2015-10-04 04:00:00	5.037	Paul Smith's College VIC	pscvic_1	2015-10-04	2015-10	October	2015	2015.75
796	796	2015-10-04 06:00:00	5.347	Paul Smith's College VIC	pscvic_1	2015-10-04	2015-10	October	2015	2015.75
797	797	2015-10-04 08:00:00	6.268	Paul Smith's College VIC	pscvic_1	2015-10-04	2015-10	October	2015	2015.75
798	798	2015-10-04 10:00:00	14.709	Paul Smith's College VIC	pscvic_1	2015-10-04	2015-10	October	2015	2015.75
799	799	2015-10-04	18.331	Paul Smith's College VIC	pscvic_1	2015-10-04	2015-10	October	2015	2015.75
800	800	2015-10-04 02:00:00	19.948	Paul Smith's College VIC	pscvic_1	2015-10-04	2015-10	October	2015	2015.75
801	801	2015-10-04 04:00:00	18.045	Paul Smith's College VIC	pscvic_1	2015-10-04	2015-10	October	2015	2015.75
802	802	2015-10-04 06:00:00	12.883	Paul Smith's College VIC	pscvic_1	2015-10-04	2015-10	October	2015	2015.75
803	803	2015-10-04 08:00:00	1.221	Paul Smith's College VIC	pscvic_1	2015-10-04	2015-10	October	2015	2015.75
804	804	2015-10-04 10:00:00	-0.549	Paul Smith's College VIC	pscvic_1	2015-10-04	2015-10	October	2015	2015.75
805	805	2015-10-05	-1.799	Paul Smith's College VIC	pscvic_1	2015-10-05	2015-10	October	2015	2015.75
806	806	2015-10-05 02:00:00	-2.844	Paul Smith's College VIC	pscvic_1	2015-10-05	2015-10	October	2015	2015.75
807	807	2015-10-05 04:00:00	-3.434	Paul Smith's College VIC	pscvic_1	2015-10-05	2015-10	October	2015	2015.75
808	808	2015-10-05 06:00:00	-3.911	Paul Smith's College VIC	pscvic_1	2015-10-05	2015-10	October	2015	2015.75
809	809	2015-10-05 08:00:00	-0.437	Paul Smith's College VIC	pscvic_1	2015-10-05	2015-10	October	2015	2015.75
810	810	2015-10-05 10:00:00	14.134	Paul Smith's College VIC	pscvic_1	2015-10-05	2015-10	October	2015	2015.75
811	811	2015-10-05	20.424	Paul Smith's College VIC	pscvic_1	2015-10-05	2015-10	October	2015	2015.75
812	812	2015-10-05 02:00:00	20.805	Paul Smith's College VIC	pscvic_1	2015-10-05	2015-10	October	2015	2015.75
813	813	2015-10-05 04:00:00	18.331	Paul Smith's College VIC	pscvic_1	2015-10-05	2015-10	October	2015	2015.75
814	814	2015-10-05 06:00:00	12.98	Paul Smith's College VIC	pscvic_1	2015-10-05	2015-10	October	2015	2015.75
815	815	2015-10-05 08:00:00	9.275	Paul Smith's College VIC	pscvic_1	2015-10-05	2015-10	October	2015	2015.75
816	816	2015-10-05 10:00:00	5.141	Paul Smith's College VIC	pscvic_1	2015-10-05	2015-10	October	2015	2015.75
817	817	2015-10-06	3.893	Paul Smith's College VIC	pscvic_1	2015-10-06	2015-10	October	2015	2015.75
818	818	2015-10-06 02:00:00	6.064	Paul Smith's College VIC	pscvic_1	2015-10-06	2015-10	October	2015	2015.75
819	819	2015-10-06 04:00:00	6.877	Paul Smith's College VIC	pscvic_1	2015-10-06	2015-10	October	2015	2015.75
820	820	2015-10-06 06:00:00	6.064	Paul Smith's College VIC	pscvic_1	2015-10-06	2015-10	October	2015	2015.75
821	821	2015-10-06 08:00:00	7.381	Paul Smith's College VIC	pscvic_1	2015-10-06	2015-10	October	2015	2015.75
822	822	2015-10-06 10:00:00	11.916	Paul Smith's College VIC	pscvic_1	2015-10-06	2015-10	October	2015	2015.75
823	823	2015-10-06	15.187	Paul Smith's College VIC	pscvic_1	2015-10-06	2015-10	October	2015	2015.75
824	824	2015-10-06 02:00:00	14.421	Paul Smith's College VIC	pscvic_1	2015-10-06	2015-10	October	2015	2015.75
825	825	2015-10-06 04:00:00	12.883	Paul Smith's College VIC	pscvic_1	2015-10-06	2015-10	October	2015	2015.75
826	826	2015-10-06 06:00:00	11.334	Paul Smith's College VIC	pscvic_1	2015-10-06	2015-10	October	2015	2015.75
827	827	2015-10-06 08:00:00	10.063	Paul Smith's College VIC	pscvic_1	2015-10-06	2015-10	October	2015	2015.75
828	828	2015-10-06 10:00:00	6.674	Paul Smith's College VIC	pscvic_1	2015-10-06	2015-10	October	2015	2015.75
829	829	2015-10-07	5.86	Paul Smith's College VIC	pscvic_1	2015-10-07	2015-10	October	2015	2015.75
830	830	2015-10-07 02:00:00	8.978	Paul Smith's College VIC	pscvic_1	2015-10-07	2015-10	October	2015	2015.75
831	831	2015-10-07 04:00:00	9.571	Paul Smith's College VIC	pscvic_1	2015-10-07	2015-10	October	2015	2015.75
832	832	2015-10-07 06:00:00	9.965	Paul Smith's College VIC	pscvic_1	2015-10-07	2015-10	October	2015	2015.75
833	833	2015-10-07 08:00:00	10.063	Paul Smith's College VIC	pscvic_1	2015-10-07	2015-10	October	2015	2015.75
834	834	2015-10-07 10:00:00	12.594	Paul Smith's College VIC	pscvic_1	2015-10-07	2015-10	October	2015	2015.75
835	835	2015-10-07	18.806	Paul Smith's College VIC	pscvic_1	2015-10-07	2015-10	October	2015	2015.75
836	836	2015-10-07 02:00:00	15.76	Paul Smith's College VIC	pscvic_1	2015-10-07	2015-10	October	2015	2015.75
837	837	2015-10-07 04:00:00	12.98	Paul Smith's College VIC	pscvic_1	2015-10-07	2015-10	October	2015	2015.75
838	838	2015-10-07 06:00:00	10.161	Paul Smith's College VIC	pscvic_1	2015-10-07	2015-10	October	2015	2015.75
839	839	2015-10-07 08:00:00	9.176	Paul Smith's College VIC	pscvic_1	2015-10-07	2015-10	October	2015	2015.75
840	840	2015-10-07 10:00:00	9.077	Paul Smith's College VIC	pscvic_1	2015-10-07	2015-10	October	2015	2015.75
841	841	2015-10-08	5.141	Paul Smith's College VIC	pscvic_1	2015-10-08	2015-10	October	2015	2015.75
842	842	2015-10-08 02:00:00	-1.228	Paul Smith's College VIC	pscvic_1	2015-10-08	2015-10	October	2015	2015.75
843	843	2015-10-08 04:00:00	-3.197	Paul Smith's College VIC	pscvic_1	2015-10-08	2015-10	October	2015	2015.75
844	844	2015-10-08 06:00:00	-4.636	Paul Smith's College VIC	pscvic_1	2015-10-08	2015-10	October	2015	2015.75
845	845	2015-10-08 08:00:00	-3.197	Paul Smith's College VIC	pscvic_1	2015-10-08	2015-10	October	2015	2015.75
846	846	2015-10-08 10:00:00	11.041	Paul Smith's College VIC	pscvic_1	2015-10-08	2015-10	October	2015	2015.75
847	847	2015-10-08	14.9	Paul Smith's College VIC	pscvic_1	2015-10-08	2015-10	October	2015	2015.75
848	848	2015-10-08 02:00:00	17.95	Paul Smith's College VIC	pscvic_1	2015-10-08	2015-10	October	2015	2015.75
849	849	2015-10-08 04:00:00	16.999	Paul Smith's College VIC	pscvic_1	2015-10-08	2015-10	October	2015	2015.75
850	850	2015-10-08 06:00:00	9.077	Paul Smith's College VIC	pscvic_1	2015-10-08	2015-10	October	2015	2015.75
851	851	2015-10-08 08:00:00	1.112	Paul Smith's College VIC	pscvic_1	2015-10-08	2015-10	October	2015	2015.75
852	852	2015-10-08 10:00:00	-0.325	Paul Smith's College VIC	pscvic_1	2015-10-08	2015-10	October	2015	2015.75
853	853	2015-10-09	1.439	Paul Smith's College VIC	pscvic_1	2015-10-09	2015-10	October	2015	2015.75
854	854	2015-10-09 02:00:00	0.893	Paul Smith's College VIC	pscvic_1	2015-10-09	2015-10	October	2015	2015.75
855	855	2015-10-09 04:00:00	3.155	Paul Smith's College VIC	pscvic_1	2015-10-09	2015-10	October	2015	2015.75
856	856	2015-10-09 06:00:00	4.519	Paul Smith's College VIC	pscvic_1	2015-10-09	2015-10	October	2015	2015.75
857	857	2015-10-09 08:00:00	6.268	Paul Smith's College VIC	pscvic_1	2015-10-09	2015-10	October	2015	2015.75
858	858	2015-10-09 10:00:00	8.779	Paul Smith's College VIC	pscvic_1	2015-10-09	2015-10	October	2015	2015.75
859	859	2015-10-09	13.173	Paul Smith's College VIC	pscvic_1	2015-10-09	2015-10	October	2015	2015.75
860	860	2015-10-09 02:00:00	14.038	Paul Smith's College VIC	pscvic_1	2015-10-09	2015-10	October	2015	2015.75
861	861	2015-10-09 04:00:00	11.236	Paul Smith's College VIC	pscvic_1	2015-10-09	2015-10	October	2015	2015.75
862	862	2015-10-09 06:00:00	6.877	Paul Smith's College VIC	pscvic_1	2015-10-09	2015-10	October	2015	2015.75
863	863	2015-10-09 08:00:00	5.347	Paul Smith's College VIC	pscvic_1	2015-10-09	2015-10	October	2015	2015.75
864	864	2015-10-09 10:00:00	5.037	Paul Smith's College VIC	pscvic_1	2015-10-09	2015-10	October	2015	2015.75
865	865	2015-10-10	5.037	Paul Smith's College VIC	pscvic_1	2015-10-10	2015-10	October	2015	2015.75
866	866	2015-10-10 02:00:00	5.244	Paul Smith's College VIC	pscvic_1	2015-10-10	2015-10	October	2015	2015.75
867	867	2015-10-10 04:00:00	3.998	Paul Smith's College VIC	pscvic_1	2015-10-10	2015-10	October	2015	2015.75
868	868	2015-10-10 06:00:00	2.303	Paul Smith's College VIC	pscvic_1	2015-10-10	2015-10	October	2015	2015.75
869	869	2015-10-10 08:00:00	2.195	Paul Smith's College VIC	pscvic_1	2015-10-10	2015-10	October	2015	2015.75
870	870	2015-10-10 10:00:00	5.141	Paul Smith's College VIC	pscvic_1	2015-10-10	2015-10	October	2015	2015.75
871	871	2015-10-10	11.041	Paul Smith's College VIC	pscvic_1	2015-10-10	2015-10	October	2015	2015.75
872	872	2015-10-10 02:00:00	13.654	Paul Smith's College VIC	pscvic_1	2015-10-10	2015-10	October	2015	2015.75
873	873	2015-10-10 04:00:00	13.173	Paul Smith's College VIC	pscvic_1	2015-10-10	2015-10	October	2015	2015.75
874	874	2015-10-10 06:00:00	5.86	Paul Smith's College VIC	pscvic_1	2015-10-10	2015-10	October	2015	2015.75
875	875	2015-10-10 08:00:00	-1.456	Paul Smith's College VIC	pscvic_1	2015-10-10	2015-10	October	2015	2015.75
876	876	2015-10-10 10:00:00	2.73	Paul Smith's College VIC	pscvic_1	2015-10-10	2015-10	October	2015	2015.75
877	877	2015-10-11	3.261	Paul Smith's College VIC	pscvic_1	2015-10-11	2015-10	October	2015	2015.75
878	878	2015-10-11 02:00:00	3.893	Paul Smith's College VIC	pscvic_1	2015-10-11	2015-10	October	2015	2015.75
879	879	2015-10-11 04:00:00	4.934	Paul Smith's College VIC	pscvic_1	2015-10-11	2015-10	October	2015	2015.75
880	880	2015-10-11 06:00:00	4.831	Paul Smith's College VIC	pscvic_1	2015-10-11	2015-10	October	2015	2015.75
881	881	2015-10-11 08:00:00	6.166	Paul Smith's College VIC	pscvic_1	2015-10-11	2015-10	October	2015	2015.75
882	882	2015-10-11 10:00:00	12.497	Paul Smith's College VIC	pscvic_1	2015-10-11	2015-10	October	2015	2015.75
883	883	2015-10-11	15.76	Paul Smith's College VIC	pscvic_1	2015-10-11	2015-10	October	2015	2015.75
884	884	2015-10-11 02:00:00	20.329	Paul Smith's College VIC	pscvic_1	2015-10-11	2015-10	October	2015	2015.75
885	885	2015-10-11 04:00:00	17.855	Paul Smith's College VIC	pscvic_1	2015-10-11	2015-10	October	2015	2015.75
886	886	2015-10-11 06:00:00	14.613	Paul Smith's College VIC	pscvic_1	2015-10-11	2015-10	October	2015	2015.75
887	887	2015-10-11 08:00:00	8.382	Paul Smith's College VIC	pscvic_1	2015-10-11	2015-10	October	2015	2015.75
888	888	2015-10-11 10:00:00	4.934	Paul Smith's College VIC	pscvic_1	2015-10-11	2015-10	October	2015	2015.75
889	889	2015-10-12	3.049	Paul Smith's College VIC	pscvic_1	2015-10-12	2015-10	October	2015	2015.75
890	890	2015-10-12 02:00:00	2.41	Paul Smith's College VIC	pscvic_1	2015-10-12	2015-10	October	2015	2015.75
891	891	2015-10-12 04:00:00	5.037	Paul Smith's College VIC	pscvic_1	2015-10-12	2015-10	October	2015	2015.75
892	892	2015-10-12 06:00:00	9.373	Paul Smith's College VIC	pscvic_1	2015-10-12	2015-10	October	2015	2015.75
893	893	2015-10-12 08:00:00	10.357	Paul Smith's College VIC	pscvic_1	2015-10-12	2015-10	October	2015	2015.75
894	894	2015-10-12 10:00:00	18.901	Paul Smith's College VIC	pscvic_1	2015-10-12	2015-10	October	2015	2015.75
895	895	2015-10-12	23.292	Paul Smith's College VIC	pscvic_1	2015-10-12	2015-10	October	2015	2015.75
896	896	2015-10-12 02:00:00	25.902	Paul Smith's College VIC	pscvic_1	2015-10-12	2015-10	October	2015	2015.75
897	897	2015-10-12 04:00:00	25.125	Paul Smith's College VIC	pscvic_1	2015-10-12	2015-10	October	2015	2015.75
898	898	2015-10-12 06:00:00	17.475	Paul Smith's College VIC	pscvic_1	2015-10-12	2015-10	October	2015	2015.75
899	899	2015-10-12 08:00:00	4.623	Paul Smith's College VIC	pscvic_1	2015-10-12	2015-10	October	2015	2015.75
900	900	2015-10-12 10:00:00	2.943	Paul Smith's College VIC	pscvic_1	2015-10-12	2015-10	October	2015	2015.75
901	901	2015-10-13	1.98	Paul Smith's College VIC	pscvic_1	2015-10-13	2015-10	October	2015	2015.75
902	902	2015-10-13 02:00:00	2.624	Paul Smith's College VIC	pscvic_1	2015-10-13	2015-10	October	2015	2015.75
903	903	2015-10-13 04:00:00	6.37	Paul Smith's College VIC	pscvic_1	2015-10-13	2015-10	October	2015	2015.75
904	904	2015-10-13 06:00:00	3.998	Paul Smith's College VIC	pscvic_1	2015-10-13	2015-10	October	2015	2015.75
905	905	2015-10-13 08:00:00	4.415	Paul Smith's College VIC	pscvic_1	2015-10-13	2015-10	October	2015	2015.75
906	906	2015-10-13 10:00:00	14.517	Paul Smith's College VIC	pscvic_1	2015-10-13	2015-10	October	2015	2015.75
907	907	2015-10-13	13.75	Paul Smith's College VIC	pscvic_1	2015-10-13	2015-10	October	2015	2015.75
908	908	2015-10-13 02:00:00	14.709	Paul Smith's College VIC	pscvic_1	2015-10-13	2015-10	October	2015	2015.75
909	909	2015-10-13 04:00:00	15.282	Paul Smith's College VIC	pscvic_1	2015-10-13	2015-10	October	2015	2015.75
910	910	2015-10-13 06:00:00	10.259	Paul Smith's College VIC	pscvic_1	2015-10-13	2015-10	October	2015	2015.75
911	911	2015-10-13 08:00:00	9.472	Paul Smith's College VIC	pscvic_1	2015-10-13	2015-10	October	2015	2015.75
912	912	2015-10-13 10:00:00	10.259	Paul Smith's College VIC	pscvic_1	2015-10-13	2015-10	October	2015	2015.75
913	913	2015-10-14	10.651	Paul Smith's College VIC	pscvic_1	2015-10-14	2015-10	October	2015	2015.75
914	914	2015-10-14 02:00:00	10.161	Paul Smith's College VIC	pscvic_1	2015-10-14	2015-10	October	2015	2015.75
915	915	2015-10-14 04:00:00	10.161	Paul Smith's College VIC	pscvic_1	2015-10-14	2015-10	October	2015	2015.75
916	916	2015-10-14 06:00:00	9.571	Paul Smith's College VIC	pscvic_1	2015-10-14	2015-10	October	2015	2015.75
917	917	2015-10-14 08:00:00	9.373	Paul Smith's College VIC	pscvic_1	2015-10-14	2015-10	October	2015	2015.75
918	918	2015-10-14 10:00:00	6.37	Paul Smith's College VIC	pscvic_1	2015-10-14	2015-10	October	2015	2015.75
919	919	2015-10-14	6.471	Paul Smith's College VIC	pscvic_1	2015-10-14	2015-10	October	2015	2015.75
920	920	2015-10-14 02:00:00	7.481	Paul Smith's College VIC	pscvic_1	2015-10-14	2015-10	October	2015	2015.75
921	921	2015-10-14 04:00:00	8.581	Paul Smith's College VIC	pscvic_1	2015-10-14	2015-10	October	2015	2015.75
922	922	2015-10-14 06:00:00	4.831	Paul Smith's College VIC	pscvic_1	2015-10-14	2015-10	October	2015	2015.75
923	923	2015-10-14 08:00:00	2.624	Paul Smith's College VIC	pscvic_1	2015-10-14	2015-10	October	2015	2015.75
924	924	2015-10-14 10:00:00	-2.261	Paul Smith's College VIC	pscvic_1	2015-10-14	2015-10	October	2015	2015.75
925	925	2015-10-15	-4.514	Paul Smith's College VIC	pscvic_1	2015-10-15	2015-10	October	2015	2015.75
926	926	2015-10-15 02:00:00	-4.758	Paul Smith's College VIC	pscvic_1	2015-10-15	2015-10	October	2015	2015.75
927	927	2015-10-15 04:00:00	-3.316	Paul Smith's College VIC	pscvic_1	2015-10-15	2015-10	October	2015	2015.75
928	928	2015-10-15 06:00:00	-5.745	Paul Smith's College VIC	pscvic_1	2015-10-15	2015-10	October	2015	2015.75
929	929	2015-10-15 08:00:00	-5.372	Paul Smith's College VIC	pscvic_1	2015-10-15	2015-10	October	2015	2015.75
930	930	2015-10-15 10:00:00	7.983	Paul Smith's College VIC	pscvic_1	2015-10-15	2015-10	October	2015	2015.75
931	931	2015-10-15	13.365	Paul Smith's College VIC	pscvic_1	2015-10-15	2015-10	October	2015	2015.75
932	932	2015-10-15 02:00:00	14.325	Paul Smith's College VIC	pscvic_1	2015-10-15	2015-10	October	2015	2015.75
933	933	2015-10-15 04:00:00	12.11	Paul Smith's College VIC	pscvic_1	2015-10-15	2015-10	October	2015	2015.75
934	934	2015-10-15 06:00:00	8.182	Paul Smith's College VIC	pscvic_1	2015-10-15	2015-10	October	2015	2015.75
935	935	2015-10-15 08:00:00	8.879	Paul Smith's College VIC	pscvic_1	2015-10-15	2015-10	October	2015	2015.75
936	936	2015-10-15 10:00:00	6.573	Paul Smith's College VIC	pscvic_1	2015-10-15	2015-10	October	2015	2015.75
937	937	2015-10-16	7.381	Paul Smith's College VIC	pscvic_1	2015-10-16	2015-10	October	2015	2015.75
938	938	2015-10-16 02:00:00	6.877	Paul Smith's College VIC	pscvic_1	2015-10-16	2015-10	October	2015	2015.75
939	939	2015-10-16 04:00:00	5.86	Paul Smith's College VIC	pscvic_1	2015-10-16	2015-10	October	2015	2015.75
940	940	2015-10-16 06:00:00	4.311	Paul Smith's College VIC	pscvic_1	2015-10-16	2015-10	October	2015	2015.75
941	941	2015-10-16 08:00:00	4.311	Paul Smith's College VIC	pscvic_1	2015-10-16	2015-10	October	2015	2015.75
942	942	2015-10-16 10:00:00	4.519	Paul Smith's College VIC	pscvic_1	2015-10-16	2015-10	October	2015	2015.75
943	943	2015-10-16	5.45	Paul Smith's College VIC	pscvic_1	2015-10-16	2015-10	October	2015	2015.75
944	944	2015-10-16 02:00:00	7.983	Paul Smith's College VIC	pscvic_1	2015-10-16	2015-10	October	2015	2015.75
945	945	2015-10-16 04:00:00	11.334	Paul Smith's College VIC	pscvic_1	2015-10-16	2015-10	October	2015	2015.75
946	946	2015-10-16 06:00:00	5.655	Paul Smith's College VIC	pscvic_1	2015-10-16	2015-10	October	2015	2015.75
947	947	2015-10-16 08:00:00	1.003	Paul Smith's College VIC	pscvic_1	2015-10-16	2015-10	October	2015	2015.75
948	948	2015-10-16 10:00:00	0.453	Paul Smith's College VIC	pscvic_1	2015-10-16	2015-10	October	2015	2015.75
949	949	2015-10-17	3.155	Paul Smith's College VIC	pscvic_1	2015-10-17	2015-10	October	2015	2015.75
950	950	2015-10-17 02:00:00	2.943	Paul Smith's College VIC	pscvic_1	2015-10-17	2015-10	October	2015	2015.75
951	951	2015-10-17 04:00:00	1.872	Paul Smith's College VIC	pscvic_1	2015-10-17	2015-10	October	2015	2015.75
952	952	2015-10-17 06:00:00	0.893	Paul Smith's College VIC	pscvic_1	2015-10-17	2015-10	October	2015	2015.75
953	953	2015-10-17 08:00:00	0.453	Paul Smith's College VIC	pscvic_1	2015-10-17	2015-10	October	2015	2015.75
954	954	2015-10-17 10:00:00	2.088	Paul Smith's College VIC	pscvic_1	2015-10-17	2015-10	October	2015	2015.75
955	955	2015-10-17	2.943	Paul Smith's College VIC	pscvic_1	2015-10-17	2015-10	October	2015	2015.75
956	956	2015-10-17 02:00:00	4.623	Paul Smith's College VIC	pscvic_1	2015-10-17	2015-10	October	2015	2015.75
957	957	2015-10-17 04:00:00	1.872	Paul Smith's College VIC	pscvic_1	2015-10-17	2015-10	October	2015	2015.75
958	958	2015-10-17 06:00:00	-1.456	Paul Smith's College VIC	pscvic_1	2015-10-17	2015-10	October	2015	2015.75
959	959	2015-10-17 08:00:00	-3.079	Paul Smith's College VIC	pscvic_1	2015-10-17	2015-10	October	2015	2015.75
960	960	2015-10-17 10:00:00	-4.031	Paul Smith's College VIC	pscvic_1	2015-10-17	2015-10	October	2015	2015.75
961	961	2015-10-18	-5.496	Paul Smith's College VIC	pscvic_1	2015-10-18	2015-10	October	2015	2015.75
962	962	2015-10-18 02:00:00	-9.388	Paul Smith's College VIC	pscvic_1	2015-10-18	2015-10	October	2015	2015.75
963	963	2015-10-18 04:00:00	-9.252	Paul Smith's College VIC	pscvic_1	2015-10-18	2015-10	October	2015	2015.75
964	964	2015-10-18 06:00:00	-4.152	Paul Smith's College VIC	pscvic_1	2015-10-18	2015-10	October	2015	2015.75
965	965	2015-10-18 08:00:00	-4.272	Paul Smith's College VIC	pscvic_1	2015-10-18	2015-10	October	2015	2015.75
966	966	2015-10-18 10:00:00	0.121	Paul Smith's College VIC	pscvic_1	2015-10-18	2015-10	October	2015	2015.75
967	967	2015-10-18	1.656	Paul Smith's College VIC	pscvic_1	2015-10-18	2015-10	October	2015	2015.75
968	968	2015-10-18 02:00:00	1.656	Paul Smith's College VIC	pscvic_1	2015-10-18	2015-10	October	2015	2015.75
969	969	2015-10-18 04:00:00	2.837	Paul Smith's College VIC	pscvic_1	2015-10-18	2015-10	October	2015	2015.75
970	970	2015-10-18 06:00:00	-2.962	Paul Smith's College VIC	pscvic_1	2015-10-18	2015-10	October	2015	2015.75
971	971	2015-10-18 08:00:00	-3.197	Paul Smith's College VIC	pscvic_1	2015-10-18	2015-10	October	2015	2015.75
972	972	2015-10-18 10:00:00	-4.272	Paul Smith's College VIC	pscvic_1	2015-10-18	2015-10	October	2015	2015.75
973	973	2015-10-19	-10.214	Paul Smith's College VIC	pscvic_1	2015-10-19	2015-10	October	2015	2015.75
974	974	2015-10-19 02:00:00	-11.776	Paul Smith's College VIC	pscvic_1	2015-10-19	2015-10	October	2015	2015.75
975	975	2015-10-19 04:00:00	-12.807	Paul Smith's College VIC	pscvic_1	2015-10-19	2015-10	October	2015	2015.75
976	976	2015-10-19 06:00:00	-13.107	Paul Smith's College VIC	pscvic_1	2015-10-19	2015-10	October	2015	2015.75
977	977	2015-10-19 08:00:00	-12.068	Paul Smith's College VIC	pscvic_1	2015-10-19	2015-10	October	2015	2015.75
978	978	2015-10-19 10:00:00	1.98	Paul Smith's College VIC	pscvic_1	2015-10-19	2015-10	October	2015	2015.75
979	979	2015-10-19	4.623	Paul Smith's College VIC	pscvic_1	2015-10-19	2015-10	October	2015	2015.75
980	980	2015-10-19 02:00:00	8.779	Paul Smith's College VIC	pscvic_1	2015-10-19	2015-10	October	2015	2015.75
981	981	2015-10-19 04:00:00	5.037	Paul Smith's College VIC	pscvic_1	2015-10-19	2015-10	October	2015	2015.75
982	982	2015-10-19 06:00:00	2.837	Paul Smith's College VIC	pscvic_1	2015-10-19	2015-10	October	2015	2015.75
983	983	2015-10-19 08:00:00	3.049	Paul Smith's College VIC	pscvic_1	2015-10-19	2015-10	October	2015	2015.75
984	984	2015-10-19 10:00:00	1.439	Paul Smith's College VIC	pscvic_1	2015-10-19	2015-10	October	2015	2015.75
985	985	2015-10-20	4.934	Paul Smith's College VIC	pscvic_1	2015-10-20	2015-10	October	2015	2015.75
986	986	2015-10-20 02:00:00	4.934	Paul Smith's College VIC	pscvic_1	2015-10-20	2015-10	October	2015	2015.75
987	987	2015-10-20 04:00:00	6.573	Paul Smith's College VIC	pscvic_1	2015-10-20	2015-10	October	2015	2015.75
988	988	2015-10-20 06:00:00	7.28	Paul Smith's College VIC	pscvic_1	2015-10-20	2015-10	October	2015	2015.75
989	989	2015-10-20 08:00:00	8.581	Paul Smith's College VIC	pscvic_1	2015-10-20	2015-10	October	2015	2015.75
990	990	2015-10-20 10:00:00	10.748	Paul Smith's College VIC	pscvic_1	2015-10-20	2015-10	October	2015	2015.75
991	991	2015-10-20	13.942	Paul Smith's College VIC	pscvic_1	2015-10-20	2015-10	October	2015	2015.75
992	992	2015-10-20 02:00:00	13.654	Paul Smith's College VIC	pscvic_1	2015-10-20	2015-10	October	2015	2015.75
993	993	2015-10-20 04:00:00	11.528	Paul Smith's College VIC	pscvic_1	2015-10-20	2015-10	October	2015	2015.75
994	994	2015-10-20 06:00:00	11.041	Paul Smith's College VIC	pscvic_1	2015-10-20	2015-10	October	2015	2015.75
995	995	2015-10-20 08:00:00	10.651	Paul Smith's College VIC	pscvic_1	2015-10-20	2015-10	October	2015	2015.75
996	996	2015-10-20 10:00:00	10.259	Paul Smith's College VIC	pscvic_1	2015-10-20	2015-10	October	2015	2015.75
997	997	2015-10-21	9.571	Paul Smith's College VIC	pscvic_1	2015-10-21	2015-10	October	2015	2015.75
998	998	2015-10-21 02:00:00	8.382	Paul Smith's College VIC	pscvic_1	2015-10-21	2015-10	October	2015	2015.75
999	999	2015-10-21 04:00:00	7.28	Paul Smith's College VIC	pscvic_1	2015-10-21	2015-10	October	2015	2015.75
1000	1000	2015-10-21 06:00:00	6.064	Paul Smith's College VIC	pscvic_1	2015-10-21	2015-10	October	2015	2015.75
1001	1001	2015-10-21 08:00:00	5.552	Paul Smith's College VIC	pscvic_1	2015-10-21	2015-10	October	2015	2015.75
1002	1002	2015-10-21 10:00:00	7.582	Paul Smith's College VIC	pscvic_1	2015-10-21	2015-10	October	2015	2015.75
1003	1003	2015-10-21	9.768	Paul Smith's College VIC	pscvic_1	2015-10-21	2015-10	October	2015	2015.75
1004	1004	2015-10-21 02:00:00	12.401	Paul Smith's College VIC	pscvic_1	2015-10-21	2015-10	October	2015	2015.75
1005	1005	2015-10-21 04:00:00	11.334	Paul Smith's College VIC	pscvic_1	2015-10-21	2015-10	October	2015	2015.75
1006	1006	2015-10-21 06:00:00	8.779	Paul Smith's College VIC	pscvic_1	2015-10-21	2015-10	October	2015	2015.75
1007	1007	2015-10-21 08:00:00	5.655	Paul Smith's College VIC	pscvic_1	2015-10-21	2015-10	October	2015	2015.75
1008	1008	2015-10-21 10:00:00	4.727	Paul Smith's College VIC	pscvic_1	2015-10-21	2015-10	October	2015	2015.75
1009	1009	2015-10-22	4.519	Paul Smith's College VIC	pscvic_1	2015-10-22	2015-10	October	2015	2015.75
1010	1010	2015-10-22 02:00:00	5.552	Paul Smith's College VIC	pscvic_1	2015-10-22	2015-10	October	2015	2015.75
1011	1011	2015-10-22 04:00:00	9.571	Paul Smith's College VIC	pscvic_1	2015-10-22	2015-10	October	2015	2015.75
1012	1012	2015-10-22 06:00:00	9.275	Paul Smith's College VIC	pscvic_1	2015-10-22	2015-10	October	2015	2015.75
1013	1013	2015-10-22 08:00:00	10.553	Paul Smith's College VIC	pscvic_1	2015-10-22	2015-10	October	2015	2015.75
1014	1014	2015-10-22 10:00:00	13.076	Paul Smith's College VIC	pscvic_1	2015-10-22	2015-10	October	2015	2015.75
1015	1015	2015-10-22	15.378	Paul Smith's College VIC	pscvic_1	2015-10-22	2015-10	October	2015	2015.75
1016	1016	2015-10-22 02:00:00	16.141	Paul Smith's College VIC	pscvic_1	2015-10-22	2015-10	October	2015	2015.75
1017	1017	2015-10-22 04:00:00	14.9	Paul Smith's College VIC	pscvic_1	2015-10-22	2015-10	October	2015	2015.75
1018	1018	2015-10-22 06:00:00	9.768	Paul Smith's College VIC	pscvic_1	2015-10-22	2015-10	October	2015	2015.75
1019	1019	2015-10-22 08:00:00	8.879	Paul Smith's College VIC	pscvic_1	2015-10-22	2015-10	October	2015	2015.75
1020	1020	2015-10-22 10:00:00	8.282	Paul Smith's College VIC	pscvic_1	2015-10-22	2015-10	October	2015	2015.75
1021	1021	2015-10-23	1.872	Paul Smith's College VIC	pscvic_1	2015-10-23	2015-10	October	2015	2015.75
1022	1022	2015-10-23 02:00:00	-1.001	Paul Smith's College VIC	pscvic_1	2015-10-23	2015-10	October	2015	2015.75
1023	1023	2015-10-23 04:00:00	-0.325	Paul Smith's College VIC	pscvic_1	2015-10-23	2015-10	October	2015	2015.75
1024	1024	2015-10-23 06:00:00	-0.325	Paul Smith's College VIC	pscvic_1	2015-10-23	2015-10	October	2015	2015.75
1025	1025	2015-10-23 08:00:00	-0.325	Paul Smith's College VIC	pscvic_1	2015-10-23	2015-10	October	2015	2015.75
1026	1026	2015-10-23 10:00:00	0.784	Paul Smith's College VIC	pscvic_1	2015-10-23	2015-10	October	2015	2015.75
1027	1027	2015-10-23	2.195	Paul Smith's College VIC	pscvic_1	2015-10-23	2015-10	October	2015	2015.75
1028	1028	2015-10-23 02:00:00	4.934	Paul Smith's College VIC	pscvic_1	2015-10-23	2015-10	October	2015	2015.75
1029	1029	2015-10-23 04:00:00	6.674	Paul Smith's College VIC	pscvic_1	2015-10-23	2015-10	October	2015	2015.75
1030	1030	2015-10-23 06:00:00	-0.774	Paul Smith's College VIC	pscvic_1	2015-10-23	2015-10	October	2015	2015.75
1031	1031	2015-10-23 08:00:00	-4.758	Paul Smith's College VIC	pscvic_1	2015-10-23	2015-10	October	2015	2015.75
1032	1032	2015-10-23 10:00:00	-6.373	Paul Smith's College VIC	pscvic_1	2015-10-23	2015-10	October	2015	2015.75
1033	1033	2015-10-24	-7.267	Paul Smith's College VIC	pscvic_1	2015-10-24	2015-10	October	2015	2015.75
1034	1034	2015-10-24 02:00:00	-7.657	Paul Smith's College VIC	pscvic_1	2015-10-24	2015-10	October	2015	2015.75
1035	1035	2015-10-24 04:00:00	-7.267	Paul Smith's College VIC	pscvic_1	2015-10-24	2015-10	October	2015	2015.75
1036	1036	2015-10-24 06:00:00	-8.314	Paul Smith's College VIC	pscvic_1	2015-10-24	2015-10	October	2015	2015.75
1037	1037	2015-10-24 08:00:00	-5.62	Paul Smith's College VIC	pscvic_1	2015-10-24	2015-10	October	2015	2015.75
1038	1038	2015-10-24 10:00:00	3.472	Paul Smith's College VIC	pscvic_1	2015-10-24	2015-10	October	2015	2015.75
1039	1039	2015-10-24	8.282	Paul Smith's College VIC	pscvic_1	2015-10-24	2015-10	October	2015	2015.75
1040	1040	2015-10-24 02:00:00	8.978	Paul Smith's College VIC	pscvic_1	2015-10-24	2015-10	October	2015	2015.75
1041	1041	2015-10-24 04:00:00	7.582	Paul Smith's College VIC	pscvic_1	2015-10-24	2015-10	October	2015	2015.75
1042	1042	2015-10-24 06:00:00	5.655	Paul Smith's College VIC	pscvic_1	2015-10-24	2015-10	October	2015	2015.75
1043	1043	2015-10-24 08:00:00	6.268	Paul Smith's College VIC	pscvic_1	2015-10-24	2015-10	October	2015	2015.75
1044	1044	2015-10-24 10:00:00	6.471	Paul Smith's College VIC	pscvic_1	2015-10-24	2015-10	October	2015	2015.75
1045	1045	2015-10-25	6.978	Paul Smith's College VIC	pscvic_1	2015-10-25	2015-10	October	2015	2015.75
1046	1046	2015-10-25 02:00:00	6.166	Paul Smith's College VIC	pscvic_1	2015-10-25	2015-10	October	2015	2015.75
1047	1047	2015-10-25 04:00:00	7.381	Paul Smith's College VIC	pscvic_1	2015-10-25	2015-10	October	2015	2015.75
1048	1048	2015-10-25 06:00:00	8.581	Paul Smith's College VIC	pscvic_1	2015-10-25	2015-10	October	2015	2015.75
1049	1049	2015-10-25 08:00:00	9.571	Paul Smith's College VIC	pscvic_1	2015-10-25	2015-10	October	2015	2015.75
1050	1050	2015-10-25 10:00:00	9.373	Paul Smith's College VIC	pscvic_1	2015-10-25	2015-10	October	2015	2015.75
1051	1051	2015-10-25	7.983	Paul Smith's College VIC	pscvic_1	2015-10-25	2015-10	October	2015	2015.75
1052	1052	2015-10-25 02:00:00	5.347	Paul Smith's College VIC	pscvic_1	2015-10-25	2015-10	October	2015	2015.75
1053	1053	2015-10-25 04:00:00	4.934	Paul Smith's College VIC	pscvic_1	2015-10-25	2015-10	October	2015	2015.75
1054	1054	2015-10-25 06:00:00	4.415	Paul Smith's College VIC	pscvic_1	2015-10-25	2015-10	October	2015	2015.75
1055	1055	2015-10-25 08:00:00	0.674	Paul Smith's College VIC	pscvic_1	2015-10-25	2015-10	October	2015	2015.75
1056	1056	2015-10-25 10:00:00	3.367	Paul Smith's College VIC	pscvic_1	2015-10-25	2015-10	October	2015	2015.75
1057	1057	2015-10-26	1.98	Paul Smith's College VIC	pscvic_1	2015-10-26	2015-10	October	2015	2015.75
1058	1058	2015-10-26 02:00:00	1.764	Paul Smith's College VIC	pscvic_1	2015-10-26	2015-10	October	2015	2015.75
1059	1059	2015-10-26 04:00:00	1.33	Paul Smith's College VIC	pscvic_1	2015-10-26	2015-10	October	2015	2015.75
1060	1060	2015-10-26 06:00:00	0.232	Paul Smith's College VIC	pscvic_1	2015-10-26	2015-10	October	2015	2015.75
1061	1061	2015-10-26 08:00:00	-0.102	Paul Smith's College VIC	pscvic_1	2015-10-26	2015-10	October	2015	2015.75
1062	1062	2015-10-26 10:00:00	5.141	Paul Smith's College VIC	pscvic_1	2015-10-26	2015-10	October	2015	2015.75
1063	1063	2015-10-26	6.37	Paul Smith's College VIC	pscvic_1	2015-10-26	2015-10	October	2015	2015.75
1064	1064	2015-10-26 02:00:00	8.978	Paul Smith's College VIC	pscvic_1	2015-10-26	2015-10	October	2015	2015.75
1065	1065	2015-10-26 04:00:00	8.082	Paul Smith's College VIC	pscvic_1	2015-10-26	2015-10	October	2015	2015.75
1066	1066	2015-10-26 06:00:00	-1.799	Paul Smith's College VIC	pscvic_1	2015-10-26	2015-10	October	2015	2015.75
1067	1067	2015-10-26 08:00:00	-5.745	Paul Smith's College VIC	pscvic_1	2015-10-26	2015-10	October	2015	2015.75
1068	1068	2015-10-26 10:00:00	-6.246	Paul Smith's College VIC	pscvic_1	2015-10-26	2015-10	October	2015	2015.75
1069	1069	2015-10-27	-7.138	Paul Smith's College VIC	pscvic_1	2015-10-27	2015-10	October	2015	2015.75
1070	1070	2015-10-27 02:00:00	-4.152	Paul Smith's College VIC	pscvic_1	2015-10-27	2015-10	October	2015	2015.75
1071	1071	2015-10-27 04:00:00	-8.314	Paul Smith's College VIC	pscvic_1	2015-10-27	2015-10	October	2015	2015.75
1072	1072	2015-10-27 06:00:00	-9.252	Paul Smith's College VIC	pscvic_1	2015-10-27	2015-10	October	2015	2015.75
1073	1073	2015-10-27 08:00:00	-8.05	Paul Smith's College VIC	pscvic_1	2015-10-27	2015-10	October	2015	2015.75
1074	1074	2015-10-27 10:00:00	5.244	Paul Smith's College VIC	pscvic_1	2015-10-27	2015-10	October	2015	2015.75
1075	1075	2015-10-27	8.481	Paul Smith's College VIC	pscvic_1	2015-10-27	2015-10	October	2015	2015.75
1076	1076	2015-10-27 02:00:00	11.041	Paul Smith's College VIC	pscvic_1	2015-10-27	2015-10	October	2015	2015.75
1077	1077	2015-10-27 04:00:00	10.259	Paul Smith's College VIC	pscvic_1	2015-10-27	2015-10	October	2015	2015.75
1078	1078	2015-10-27 06:00:00	-1.456	Paul Smith's College VIC	pscvic_1	2015-10-27	2015-10	October	2015	2015.75
1079	1079	2015-10-27 08:00:00	-3.672	Paul Smith's College VIC	pscvic_1	2015-10-27	2015-10	October	2015	2015.75
1080	1080	2015-10-27 10:00:00	-5.003	Paul Smith's College VIC	pscvic_1	2015-10-27	2015-10	October	2015	2015.75
1081	1081	2015-10-28	-5.745	Paul Smith's College VIC	pscvic_1	2015-10-28	2015-10	October	2015	2015.75
1082	1082	2015-10-28 02:00:00	-5.745	Paul Smith's College VIC	pscvic_1	2015-10-28	2015-10	October	2015	2015.75
1083	1083	2015-10-28 04:00:00	-5.372	Paul Smith's College VIC	pscvic_1	2015-10-28	2015-10	October	2015	2015.75
1084	1084	2015-10-28 06:00:00	-4.636	Paul Smith's College VIC	pscvic_1	2015-10-28	2015-10	October	2015	2015.75
1085	1085	2015-10-28 08:00:00	-2.962	Paul Smith's College VIC	pscvic_1	2015-10-28	2015-10	October	2015	2015.75
1086	1086	2015-10-28 10:00:00	3.683	Paul Smith's College VIC	pscvic_1	2015-10-28	2015-10	October	2015	2015.75
1087	1087	2015-10-28	4.623	Paul Smith's College VIC	pscvic_1	2015-10-28	2015-10	October	2015	2015.75
1088	1088	2015-10-28 02:00:00	4.311	Paul Smith's College VIC	pscvic_1	2015-10-28	2015-10	October	2015	2015.75
1089	1089	2015-10-28 04:00:00	5.655	Paul Smith's College VIC	pscvic_1	2015-10-28	2015-10	October	2015	2015.75
1090	1090	2015-10-28 06:00:00	8.581	Paul Smith's College VIC	pscvic_1	2015-10-28	2015-10	October	2015	2015.75
1091	1091	2015-10-28 08:00:00	8.879	Paul Smith's College VIC	pscvic_1	2015-10-28	2015-10	October	2015	2015.75
1092	1092	2015-10-28 10:00:00	11.041	Paul Smith's College VIC	pscvic_1	2015-10-28	2015-10	October	2015	2015.75
1093	1093	2015-10-29	11.334	Paul Smith's College VIC	pscvic_1	2015-10-29	2015-10	October	2015	2015.75
1094	1094	2015-10-29 02:00:00	11.139	Paul Smith's College VIC	pscvic_1	2015-10-29	2015-10	October	2015	2015.75
1095	1095	2015-10-29 04:00:00	11.625	Paul Smith's College VIC	pscvic_1	2015-10-29	2015-10	October	2015	2015.75
1096	1096	2015-10-29 06:00:00	12.98	Paul Smith's College VIC	pscvic_1	2015-10-29	2015-10	October	2015	2015.75
1097	1097	2015-10-29 08:00:00	12.401	Paul Smith's College VIC	pscvic_1	2015-10-29	2015-10	October	2015	2015.75
1098	1098	2015-10-29 10:00:00	12.497	Paul Smith's College VIC	pscvic_1	2015-10-29	2015-10	October	2015	2015.75
1099	1099	2015-10-29	10.455	Paul Smith's College VIC	pscvic_1	2015-10-29	2015-10	October	2015	2015.75
1100	1100	2015-10-29 02:00:00	10.455	Paul Smith's College VIC	pscvic_1	2015-10-29	2015-10	October	2015	2015.75
1101	1101	2015-10-29 04:00:00	7.582	Paul Smith's College VIC	pscvic_1	2015-10-29	2015-10	October	2015	2015.75
1102	1102	2015-10-29 06:00:00	5.45	Paul Smith's College VIC	pscvic_1	2015-10-29	2015-10	October	2015	2015.75
1103	1103	2015-10-29 08:00:00	2.943	Paul Smith's College VIC	pscvic_1	2015-10-29	2015-10	October	2015	2015.75
1104	1104	2015-10-29 10:00:00	2.943	Paul Smith's College VIC	pscvic_1	2015-10-29	2015-10	October	2015	2015.75
1105	1105	2015-10-30	3.367	Paul Smith's College VIC	pscvic_1	2015-10-30	2015-10	October	2015	2015.75
1106	1106	2015-10-30 02:00:00	3.998	Paul Smith's College VIC	pscvic_1	2015-10-30	2015-10	October	2015	2015.75
1107	1107	2015-10-30 04:00:00	4.727	Paul Smith's College VIC	pscvic_1	2015-10-30	2015-10	October	2015	2015.75
1108	1108	2015-10-30 06:00:00	1.98	Paul Smith's College VIC	pscvic_1	2015-10-30	2015-10	October	2015	2015.75
1109	1109	2015-10-30 08:00:00	0.674	Paul Smith's College VIC	pscvic_1	2015-10-30	2015-10	October	2015	2015.75
1110	1110	2015-10-30 10:00:00	1.33	Paul Smith's College VIC	pscvic_1	2015-10-30	2015-10	October	2015	2015.75
1111	1111	2015-10-30	2.517	Paul Smith's College VIC	pscvic_1	2015-10-30	2015-10	October	2015	2015.75
1112	1112	2015-10-30 02:00:00	3.367	Paul Smith's College VIC	pscvic_1	2015-10-30	2015-10	October	2015	2015.75
1113	1113	2015-10-30 04:00:00	5.141	Paul Smith's College VIC	pscvic_1	2015-10-30	2015-10	October	2015	2015.75
1114	1114	2015-10-30 06:00:00	-1.57	Paul Smith's College VIC	pscvic_1	2015-10-30	2015-10	October	2015	2015.75
1115	1115	2015-10-30 08:00:00	-2.03	Paul Smith's College VIC	pscvic_1	2015-10-30	2015-10	October	2015	2015.75
1116	1116	2015-10-30 10:00:00	-4.514	Paul Smith's College VIC	pscvic_1	2015-10-30	2015-10	October	2015	2015.75
1117	1117	2015-10-31	-6.246	Paul Smith's College VIC	pscvic_1	2015-10-31	2015-10	October	2015	2015.75
1118	1118	2015-10-31 02:00:00	-7.397	Paul Smith's College VIC	pscvic_1	2015-10-31	2015-10	October	2015	2015.75
1119	1119	2015-10-31 04:00:00	-7.267	Paul Smith's College VIC	pscvic_1	2015-10-31	2015-10	October	2015	2015.75
1120	1120	2015-10-31 06:00:00	-4.031	Paul Smith's College VIC	pscvic_1	2015-10-31	2015-10	October	2015	2015.75
1121	1121	2015-10-31 08:00:00	-3.079	Paul Smith's College VIC	pscvic_1	2015-10-31	2015-10	October	2015	2015.75
1122	1122	2015-10-31 10:00:00	3.998	Paul Smith's College VIC	pscvic_1	2015-10-31	2015-10	October	2015	2015.75
1123	1123	2015-10-31	8.082	Paul Smith's College VIC	pscvic_1	2015-10-31	2015-10	October	2015	2015.75
1124	1124	2015-10-31 02:00:00	7.782	Paul Smith's College VIC	pscvic_1	2015-10-31	2015-10	October	2015	2015.75
1125	1125	2015-10-31 04:00:00	5.962	Paul Smith's College VIC	pscvic_1	2015-10-31	2015-10	October	2015	2015.75
1126	1126	2015-10-31 06:00:00	2.303	Paul Smith's College VIC	pscvic_1	2015-10-31	2015-10	October	2015	2015.75
1127	1127	2015-10-31 08:00:00	-0.774	Paul Smith's College VIC	pscvic_1	2015-10-31	2015-10	October	2015	2015.75
1128	1128	2015-10-31 10:00:00	0.01	Paul Smith's College VIC	pscvic_1	2015-10-31	2015-10	October	2015	2015.75
1129	1129	2015-11-01	0.121	Paul Smith's College VIC	pscvic_1	2015-11-01	2015-11	November	2015	2015.75
1130	1130	2015-11-01 02:00:00	1.439	Paul Smith's College VIC	pscvic_1	2015-11-01	2015-11	November	2015	2015.75
1131	1131	2015-11-01 04:00:00	2.088	Paul Smith's College VIC	pscvic_1	2015-11-01	2015-11	November	2015	2015.75
1132	1132	2015-11-01 06:00:00	2.41	Paul Smith's College VIC	pscvic_1	2015-11-01	2015-11	November	2015	2015.75
1133	1133	2015-11-01 08:00:00	4.207	Paul Smith's College VIC	pscvic_1	2015-11-01	2015-11	November	2015	2015.75
1134	1134	2015-11-01 10:00:00	6.166	Paul Smith's College VIC	pscvic_1	2015-11-01	2015-11	November	2015	2015.75
1135	1135	2015-11-01	8.978	Paul Smith's College VIC	pscvic_1	2015-11-01	2015-11	November	2015	2015.75
1136	1136	2015-11-01 02:00:00	12.013	Paul Smith's College VIC	pscvic_1	2015-11-01	2015-11	November	2015	2015.75
1137	1137	2015-11-01 04:00:00	10.553	Paul Smith's College VIC	pscvic_1	2015-11-01	2015-11	November	2015	2015.75
1138	1138	2015-11-01 06:00:00	8.282	Paul Smith's College VIC	pscvic_1	2015-11-01	2015-11	November	2015	2015.75
1139	1139	2015-11-01 08:00:00	6.573	Paul Smith's College VIC	pscvic_1	2015-11-01	2015-11	November	2015	2015.75
1140	1140	2015-11-01 10:00:00	5.552	Paul Smith's College VIC	pscvic_1	2015-11-01	2015-11	November	2015	2015.75
1141	1141	2015-11-02	7.179	Paul Smith's College VIC	pscvic_1	2015-11-02	2015-11	November	2015	2015.75
1142	1142	2015-11-02 02:00:00	5.757	Paul Smith's College VIC	pscvic_1	2015-11-02	2015-11	November	2015	2015.75
1143	1143	2015-11-02 04:00:00	6.064	Paul Smith's College VIC	pscvic_1	2015-11-02	2015-11	November	2015	2015.75
1144	1144	2015-11-02 06:00:00	6.064	Paul Smith's College VIC	pscvic_1	2015-11-02	2015-11	November	2015	2015.75
1145	1145	2015-11-02 08:00:00	6.166	Paul Smith's College VIC	pscvic_1	2015-11-02	2015-11	November	2015	2015.75
1146	1146	2015-11-02 10:00:00	7.882	Paul Smith's College VIC	pscvic_1	2015-11-02	2015-11	November	2015	2015.75
1147	1147	2015-11-02	9.866	Paul Smith's College VIC	pscvic_1	2015-11-02	2015-11	November	2015	2015.75
1148	1148	2015-11-02 02:00:00	10.063	Paul Smith's College VIC	pscvic_1	2015-11-02	2015-11	November	2015	2015.75
1149	1149	2015-11-02 04:00:00	13.75	Paul Smith's College VIC	pscvic_1	2015-11-02	2015-11	November	2015	2015.75
1150	1150	2015-11-02 06:00:00	3.578	Paul Smith's College VIC	pscvic_1	2015-11-02	2015-11	November	2015	2015.75
1151	1151	2015-11-02 08:00:00	3.683	Paul Smith's College VIC	pscvic_1	2015-11-02	2015-11	November	2015	2015.75
1152	1152	2015-11-02 10:00:00	3.683	Paul Smith's College VIC	pscvic_1	2015-11-02	2015-11	November	2015	2015.75
1153	1153	2015-11-03	3.049	Paul Smith's College VIC	pscvic_1	2015-11-03	2015-11	November	2015	2015.75
1154	1154	2015-11-03 02:00:00	1.548	Paul Smith's College VIC	pscvic_1	2015-11-03	2015-11	November	2015	2015.75
1155	1155	2015-11-03 04:00:00	6.268	Paul Smith's College VIC	pscvic_1	2015-11-03	2015-11	November	2015	2015.75
1156	1156	2015-11-03 06:00:00	5.655	Paul Smith's College VIC	pscvic_1	2015-11-03	2015-11	November	2015	2015.75
1157	1157	2015-11-03 08:00:00	10.748	Paul Smith's College VIC	pscvic_1	2015-11-03	2015-11	November	2015	2015.75
1158	1158	2015-11-03 10:00:00	14.421	Paul Smith's College VIC	pscvic_1	2015-11-03	2015-11	November	2015	2015.75
1159	1159	2015-11-03	17.189	Paul Smith's College VIC	pscvic_1	2015-11-03	2015-11	November	2015	2015.75
1160	1160	2015-11-03 02:00:00	18.521	Paul Smith's College VIC	pscvic_1	2015-11-03	2015-11	November	2015	2015.75
1161	1161	2015-11-03 04:00:00	18.616	Paul Smith's College VIC	pscvic_1	2015-11-03	2015-11	November	2015	2015.75
1162	1162	2015-11-03 06:00:00	11.916	Paul Smith's College VIC	pscvic_1	2015-11-03	2015-11	November	2015	2015.75
1163	1163	2015-11-03 08:00:00	7.983	Paul Smith's College VIC	pscvic_1	2015-11-03	2015-11	November	2015	2015.75
1164	1164	2015-11-03 10:00:00	4.102	Paul Smith's College VIC	pscvic_1	2015-11-03	2015-11	November	2015	2015.75
1165	1165	2015-11-04	-1.114	Paul Smith's College VIC	pscvic_1	2015-11-04	2015-11	November	2015	2015.75
1166	1166	2015-11-04 02:00:00	-2.377	Paul Smith's College VIC	pscvic_1	2015-11-04	2015-11	November	2015	2015.75
1167	1167	2015-11-04 04:00:00	-3.197	Paul Smith's College VIC	pscvic_1	2015-11-04	2015-11	November	2015	2015.75
1168	1168	2015-11-04 06:00:00	-4.031	Paul Smith's College VIC	pscvic_1	2015-11-04	2015-11	November	2015	2015.75
1169	1169	2015-11-04 08:00:00	-3.672	Paul Smith's College VIC	pscvic_1	2015-11-04	2015-11	November	2015	2015.75
1170	1170	2015-11-04 10:00:00	7.28	Paul Smith's College VIC	pscvic_1	2015-11-04	2015-11	November	2015	2015.75
1171	1171	2015-11-04	16.713	Paul Smith's College VIC	pscvic_1	2015-11-04	2015-11	November	2015	2015.75
1172	1172	2015-11-04 02:00:00	21.187	Paul Smith's College VIC	pscvic_1	2015-11-04	2015-11	November	2015	2015.75
1173	1173	2015-11-04 04:00:00	22.238	Paul Smith's College VIC	pscvic_1	2015-11-04	2015-11	November	2015	2015.75
1174	1174	2015-11-04 06:00:00	7.179	Paul Smith's College VIC	pscvic_1	2015-11-04	2015-11	November	2015	2015.75
1175	1175	2015-11-04 08:00:00	1.548	Paul Smith's College VIC	pscvic_1	2015-11-04	2015-11	November	2015	2015.75
1176	1176	2015-11-04 10:00:00	0.453	Paul Smith's College VIC	pscvic_1	2015-11-04	2015-11	November	2015	2015.75
1177	1177	2015-11-05	0.563	Paul Smith's College VIC	pscvic_1	2015-11-05	2015-11	November	2015	2015.75
1178	1178	2015-11-05 02:00:00	0.674	Paul Smith's College VIC	pscvic_1	2015-11-05	2015-11	November	2015	2015.75
1179	1179	2015-11-05 04:00:00	6.573	Paul Smith's College VIC	pscvic_1	2015-11-05	2015-11	November	2015	2015.75
1180	1180	2015-11-05 06:00:00	10.455	Paul Smith's College VIC	pscvic_1	2015-11-05	2015-11	November	2015	2015.75
1181	1181	2015-11-05 08:00:00	11.722	Paul Smith's College VIC	pscvic_1	2015-11-05	2015-11	November	2015	2015.75
1182	1182	2015-11-05 10:00:00	15.855	Paul Smith's College VIC	pscvic_1	2015-11-05	2015-11	November	2015	2015.75
1183	1183	2015-11-05	21.091	Paul Smith's College VIC	pscvic_1	2015-11-05	2015-11	November	2015	2015.75
1184	1184	2015-11-05 02:00:00	21.664	Paul Smith's College VIC	pscvic_1	2015-11-05	2015-11	November	2015	2015.75
1185	1185	2015-11-05 04:00:00	20.138	Paul Smith's College VIC	pscvic_1	2015-11-05	2015-11	November	2015	2015.75
1186	1186	2015-11-05 06:00:00	15.951	Paul Smith's College VIC	pscvic_1	2015-11-05	2015-11	November	2015	2015.75
1187	1187	2015-11-05 08:00:00	7.983	Paul Smith's College VIC	pscvic_1	2015-11-05	2015-11	November	2015	2015.75
1188	1188	2015-11-05 10:00:00	7.582	Paul Smith's College VIC	pscvic_1	2015-11-05	2015-11	November	2015	2015.75
1189	1189	2015-11-06	7.28	Paul Smith's College VIC	pscvic_1	2015-11-06	2015-11	November	2015	2015.75
1190	1190	2015-11-06 02:00:00	9.768	Paul Smith's College VIC	pscvic_1	2015-11-06	2015-11	November	2015	2015.75
1191	1191	2015-11-06 04:00:00	11.431	Paul Smith's College VIC	pscvic_1	2015-11-06	2015-11	November	2015	2015.75
1192	1192	2015-11-06 06:00:00	11.236	Paul Smith's College VIC	pscvic_1	2015-11-06	2015-11	November	2015	2015.75
1193	1193	2015-11-06 08:00:00	14.421	Paul Smith's College VIC	pscvic_1	2015-11-06	2015-11	November	2015	2015.75
1194	1194	2015-11-06 10:00:00	16.713	Paul Smith's College VIC	pscvic_1	2015-11-06	2015-11	November	2015	2015.75
1195	1195	2015-11-06	21.569	Paul Smith's College VIC	pscvic_1	2015-11-06	2015-11	November	2015	2015.75
1196	1196	2015-11-06 02:00:00	16.903	Paul Smith's College VIC	pscvic_1	2015-11-06	2015-11	November	2015	2015.75
1197	1197	2015-11-06 04:00:00	15.187	Paul Smith's College VIC	pscvic_1	2015-11-06	2015-11	November	2015	2015.75
1198	1198	2015-11-06 06:00:00	12.69	Paul Smith's College VIC	pscvic_1	2015-11-06	2015-11	November	2015	2015.75
1199	1199	2015-11-06 08:00:00	11.916	Paul Smith's College VIC	pscvic_1	2015-11-06	2015-11	November	2015	2015.75
1200	1200	2015-11-06 10:00:00	11.041	Paul Smith's College VIC	pscvic_1	2015-11-06	2015-11	November	2015	2015.75
1201	1201	2015-11-07	8.68	Paul Smith's College VIC	pscvic_1	2015-11-07	2015-11	November	2015	2015.75
1202	1202	2015-11-07 02:00:00	7.179	Paul Smith's College VIC	pscvic_1	2015-11-07	2015-11	November	2015	2015.75
1203	1203	2015-11-07 04:00:00	6.064	Paul Smith's College VIC	pscvic_1	2015-11-07	2015-11	November	2015	2015.75
1204	1204	2015-11-07 06:00:00	4.831	Paul Smith's College VIC	pscvic_1	2015-11-07	2015-11	November	2015	2015.75
1205	1205	2015-11-07 08:00:00	3.683	Paul Smith's College VIC	pscvic_1	2015-11-07	2015-11	November	2015	2015.75
1206	1206	2015-11-07 10:00:00	8.282	Paul Smith's College VIC	pscvic_1	2015-11-07	2015-11	November	2015	2015.75
1207	1207	2015-11-07	10.259	Paul Smith's College VIC	pscvic_1	2015-11-07	2015-11	November	2015	2015.75
1208	1208	2015-11-07 02:00:00	11.722	Paul Smith's College VIC	pscvic_1	2015-11-07	2015-11	November	2015	2015.75
1209	1209	2015-11-07 04:00:00	7.179	Paul Smith's College VIC	pscvic_1	2015-11-07	2015-11	November	2015	2015.75
1210	1210	2015-11-07 06:00:00	4.727	Paul Smith's College VIC	pscvic_1	2015-11-07	2015-11	November	2015	2015.75
1211	1211	2015-11-07 08:00:00	3.049	Paul Smith's College VIC	pscvic_1	2015-11-07	2015-11	November	2015	2015.75
1212	1212	2015-11-07 10:00:00	3.683	Paul Smith's College VIC	pscvic_1	2015-11-07	2015-11	November	2015	2015.75
1213	1213	2015-11-08	2.195	Paul Smith's College VIC	pscvic_1	2015-11-08	2015-11	November	2015	2015.75
1214	1214	2015-11-08 02:00:00	2.195	Paul Smith's College VIC	pscvic_1	2015-11-08	2015-11	November	2015	2015.75
1215	1215	2015-11-08 04:00:00	-0.549	Paul Smith's College VIC	pscvic_1	2015-11-08	2015-11	November	2015	2015.75
1216	1216	2015-11-08 06:00:00	0.453	Paul Smith's College VIC	pscvic_1	2015-11-08	2015-11	November	2015	2015.75
1217	1217	2015-11-08 08:00:00	0.232	Paul Smith's College VIC	pscvic_1	2015-11-08	2015-11	November	2015	2015.75
1218	1218	2015-11-08 10:00:00	4.207	Paul Smith's College VIC	pscvic_1	2015-11-08	2015-11	November	2015	2015.75
1219	1219	2015-11-08	6.674	Paul Smith's College VIC	pscvic_1	2015-11-08	2015-11	November	2015	2015.75
1220	1220	2015-11-08 02:00:00	8.68	Paul Smith's College VIC	pscvic_1	2015-11-08	2015-11	November	2015	2015.75
1221	1221	2015-11-08 04:00:00	7.882	Paul Smith's College VIC	pscvic_1	2015-11-08	2015-11	November	2015	2015.75
1222	1222	2015-11-08 06:00:00	2.303	Paul Smith's College VIC	pscvic_1	2015-11-08	2015-11	November	2015	2015.75
1223	1223	2015-11-08 08:00:00	1.33	Paul Smith's College VIC	pscvic_1	2015-11-08	2015-11	November	2015	2015.75
1224	1224	2015-11-08 10:00:00	1.439	Paul Smith's College VIC	pscvic_1	2015-11-08	2015-11	November	2015	2015.75
1225	1225	2015-11-09	1.548	Paul Smith's College VIC	pscvic_1	2015-11-09	2015-11	November	2015	2015.75
1226	1226	2015-11-09 02:00:00	-2.261	Paul Smith's College VIC	pscvic_1	2015-11-09	2015-11	November	2015	2015.75
1227	1227	2015-11-09 04:00:00	-2.145	Paul Smith's College VIC	pscvic_1	2015-11-09	2015-11	November	2015	2015.75
1228	1228	2015-11-09 06:00:00	-1.114	Paul Smith's College VIC	pscvic_1	2015-11-09	2015-11	November	2015	2015.75
1229	1229	2015-11-09 08:00:00	0.453	Paul Smith's College VIC	pscvic_1	2015-11-09	2015-11	November	2015	2015.75
1230	1230	2015-11-09 10:00:00	6.674	Paul Smith's College VIC	pscvic_1	2015-11-09	2015-11	November	2015	2015.75
1231	1231	2015-11-09	10.161	Paul Smith's College VIC	pscvic_1	2015-11-09	2015-11	November	2015	2015.75
1232	1232	2015-11-09 02:00:00	14.038	Paul Smith's College VIC	pscvic_1	2015-11-09	2015-11	November	2015	2015.75
1233	1233	2015-11-09 04:00:00	13.558	Paul Smith's College VIC	pscvic_1	2015-11-09	2015-11	November	2015	2015.75
1234	1234	2015-11-09 06:00:00	-0.213	Paul Smith's College VIC	pscvic_1	2015-11-09	2015-11	November	2015	2015.75
1235	1235	2015-11-09 08:00:00	-4.031	Paul Smith's College VIC	pscvic_1	2015-11-09	2015-11	November	2015	2015.75
1236	1236	2015-11-09 10:00:00	-4.272	Paul Smith's College VIC	pscvic_1	2015-11-09	2015-11	November	2015	2015.75
1237	1237	2015-11-10	-5.125	Paul Smith's College VIC	pscvic_1	2015-11-10	2015-11	November	2015	2015.75
1238	1238	2015-11-10 02:00:00	-7.01	Paul Smith's College VIC	pscvic_1	2015-11-10	2015-11	November	2015	2015.75
1239	1239	2015-11-10 04:00:00	-7.918	Paul Smith's College VIC	pscvic_1	2015-11-10	2015-11	November	2015	2015.75
1240	1240	2015-11-10 06:00:00	-8.58	Paul Smith's College VIC	pscvic_1	2015-11-10	2015-11	November	2015	2015.75
1241	1241	2015-11-10 08:00:00	-8.58	Paul Smith's College VIC	pscvic_1	2015-11-10	2015-11	November	2015	2015.75
1242	1242	2015-11-10 10:00:00	2.73	Paul Smith's College VIC	pscvic_1	2015-11-10	2015-11	November	2015	2015.75
1243	1243	2015-11-10	11.819	Paul Smith's College VIC	pscvic_1	2015-11-10	2015-11	November	2015	2015.75
1244	1244	2015-11-10 02:00:00	14.517	Paul Smith's College VIC	pscvic_1	2015-11-10	2015-11	November	2015	2015.75
1245	1245	2015-11-10 04:00:00	13.846	Paul Smith's College VIC	pscvic_1	2015-11-10	2015-11	November	2015	2015.75
1246	1246	2015-11-10 06:00:00	9.965	Paul Smith's College VIC	pscvic_1	2015-11-10	2015-11	November	2015	2015.75
1247	1247	2015-11-10 08:00:00	3.472	Paul Smith's College VIC	pscvic_1	2015-11-10	2015-11	November	2015	2015.75
1248	1248	2015-11-10 10:00:00	3.155	Paul Smith's College VIC	pscvic_1	2015-11-10	2015-11	November	2015	2015.75
1249	1249	2015-11-11	2.73	Paul Smith's College VIC	pscvic_1	2015-11-11	2015-11	November	2015	2015.75
1250	1250	2015-11-11 02:00:00	3.472	Paul Smith's College VIC	pscvic_1	2015-11-11	2015-11	November	2015	2015.75
1251	1251	2015-11-11 04:00:00	3.893	Paul Smith's College VIC	pscvic_1	2015-11-11	2015-11	November	2015	2015.75
1252	1252	2015-11-11 06:00:00	4.207	Paul Smith's College VIC	pscvic_1	2015-11-11	2015-11	November	2015	2015.75
1253	1253	2015-11-11 08:00:00	4.207	Paul Smith's College VIC	pscvic_1	2015-11-11	2015-11	November	2015	2015.75
1254	1254	2015-11-11 10:00:00	6.775	Paul Smith's College VIC	pscvic_1	2015-11-11	2015-11	November	2015	2015.75
1255	1255	2015-11-11	9.669	Paul Smith's College VIC	pscvic_1	2015-11-11	2015-11	November	2015	2015.75
1256	1256	2015-11-11 02:00:00	16.523	Paul Smith's College VIC	pscvic_1	2015-11-11	2015-11	November	2015	2015.75
1257	1257	2015-11-11 04:00:00	13.461	Paul Smith's College VIC	pscvic_1	2015-11-11	2015-11	November	2015	2015.75
1258	1258	2015-11-11 06:00:00	5.244	Paul Smith's College VIC	pscvic_1	2015-11-11	2015-11	November	2015	2015.75
1259	1259	2015-11-11 08:00:00	3.367	Paul Smith's College VIC	pscvic_1	2015-11-11	2015-11	November	2015	2015.75
1260	1260	2015-11-11 10:00:00	5.655	Paul Smith's College VIC	pscvic_1	2015-11-11	2015-11	November	2015	2015.75
1261	1261	2015-11-12	6.775	Paul Smith's College VIC	pscvic_1	2015-11-12	2015-11	November	2015	2015.75
1262	1262	2015-11-12 02:00:00	7.481	Paul Smith's College VIC	pscvic_1	2015-11-12	2015-11	November	2015	2015.75
1263	1263	2015-11-12 04:00:00	7.381	Paul Smith's College VIC	pscvic_1	2015-11-12	2015-11	November	2015	2015.75
1264	1264	2015-11-12 06:00:00	7.381	Paul Smith's College VIC	pscvic_1	2015-11-12	2015-11	November	2015	2015.75
1265	1265	2015-11-12 08:00:00	6.877	Paul Smith's College VIC	pscvic_1	2015-11-12	2015-11	November	2015	2015.75
1266	1266	2015-11-12 10:00:00	8.978	Paul Smith's College VIC	pscvic_1	2015-11-12	2015-11	November	2015	2015.75
1267	1267	2015-11-12	11.041	Paul Smith's College VIC	pscvic_1	2015-11-12	2015-11	November	2015	2015.75
1268	1268	2015-11-12 02:00:00	8.779	Paul Smith's College VIC	pscvic_1	2015-11-12	2015-11	November	2015	2015.75
1269	1269	2015-11-12 04:00:00	8.382	Paul Smith's College VIC	pscvic_1	2015-11-12	2015-11	November	2015	2015.75
1270	1270	2015-11-12 06:00:00	8.581	Paul Smith's College VIC	pscvic_1	2015-11-12	2015-11	November	2015	2015.75
1271	1271	2015-11-12 08:00:00	6.877	Paul Smith's College VIC	pscvic_1	2015-11-12	2015-11	November	2015	2015.75
1272	1272	2015-11-12 10:00:00	6.573	Paul Smith's College VIC	pscvic_1	2015-11-12	2015-11	November	2015	2015.75
1273	1273	2015-11-13	6.674	Paul Smith's College VIC	pscvic_1	2015-11-13	2015-11	November	2015	2015.75
1274	1274	2015-11-13 02:00:00	6.064	Paul Smith's College VIC	pscvic_1	2015-11-13	2015-11	November	2015	2015.75
1275	1275	2015-11-13 04:00:00	6.37	Paul Smith's College VIC	pscvic_1	2015-11-13	2015-11	November	2015	2015.75
1276	1276	2015-11-13 06:00:00	6.37	Paul Smith's College VIC	pscvic_1	2015-11-13	2015-11	November	2015	2015.75
1277	1277	2015-11-13 08:00:00	6.166	Paul Smith's College VIC	pscvic_1	2015-11-13	2015-11	November	2015	2015.75
1278	1278	2015-11-13 10:00:00	5.86	Paul Smith's College VIC	pscvic_1	2015-11-13	2015-11	November	2015	2015.75
1279	1279	2015-11-13	5.655	Paul Smith's College VIC	pscvic_1	2015-11-13	2015-11	November	2015	2015.75
1280	1280	2015-11-13 02:00:00	5.347	Paul Smith's College VIC	pscvic_1	2015-11-13	2015-11	November	2015	2015.75
1281	1281	2015-11-13 04:00:00	3.788	Paul Smith's College VIC	pscvic_1	2015-11-13	2015-11	November	2015	2015.75
1282	1282	2015-11-13 06:00:00	2.943	Paul Smith's College VIC	pscvic_1	2015-11-13	2015-11	November	2015	2015.75
1283	1283	2015-11-13 08:00:00	2.195	Paul Smith's College VIC	pscvic_1	2015-11-13	2015-11	November	2015	2015.75
1284	1284	2015-11-13 10:00:00	1.656	Paul Smith's College VIC	pscvic_1	2015-11-13	2015-11	November	2015	2015.75
1285	1285	2015-11-14	0.453	Paul Smith's College VIC	pscvic_1	2015-11-14	2015-11	November	2015	2015.75
1286	1286	2015-11-14 02:00:00	-0.549	Paul Smith's College VIC	pscvic_1	2015-11-14	2015-11	November	2015	2015.75
1287	1287	2015-11-14 04:00:00	-2.494	Paul Smith's College VIC	pscvic_1	2015-11-14	2015-11	November	2015	2015.75
1288	1288	2015-11-14 06:00:00	-4.031	Paul Smith's College VIC	pscvic_1	2015-11-14	2015-11	November	2015	2015.75
1289	1289	2015-11-14 08:00:00	-4.031	Paul Smith's College VIC	pscvic_1	2015-11-14	2015-11	November	2015	2015.75
1290	1290	2015-11-14 10:00:00	-2.844	Paul Smith's College VIC	pscvic_1	2015-11-14	2015-11	November	2015	2015.75
1291	1291	2015-11-14	-0.437	Paul Smith's College VIC	pscvic_1	2015-11-14	2015-11	November	2015	2015.75
1292	1292	2015-11-14 02:00:00	-1.341	Paul Smith's College VIC	pscvic_1	2015-11-14	2015-11	November	2015	2015.75
1293	1293	2015-11-14 04:00:00	-0.887	Paul Smith's College VIC	pscvic_1	2015-11-14	2015-11	November	2015	2015.75
1294	1294	2015-11-14 06:00:00	-1.914	Paul Smith's College VIC	pscvic_1	2015-11-14	2015-11	November	2015	2015.75
1295	1295	2015-11-14 08:00:00	-2.145	Paul Smith's College VIC	pscvic_1	2015-11-14	2015-11	November	2015	2015.75
1296	1296	2015-11-14 10:00:00	-3.672	Paul Smith's College VIC	pscvic_1	2015-11-14	2015-11	November	2015	2015.75
1297	1297	2015-11-15	-2.962	Paul Smith's College VIC	pscvic_1	2015-11-15	2015-11	November	2015	2015.75
1298	1298	2015-11-15 02:00:00	-2.261	Paul Smith's College VIC	pscvic_1	2015-11-15	2015-11	November	2015	2015.75
1299	1299	2015-11-15 04:00:00	-1.799	Paul Smith's College VIC	pscvic_1	2015-11-15	2015-11	November	2015	2015.75
1300	1300	2015-11-15 06:00:00	-0.887	Paul Smith's College VIC	pscvic_1	2015-11-15	2015-11	November	2015	2015.75
1301	1301	2015-11-15 08:00:00	-3.911	Paul Smith's College VIC	pscvic_1	2015-11-15	2015-11	November	2015	2015.75
1302	1302	2015-11-15 10:00:00	5.037	Paul Smith's College VIC	pscvic_1	2015-11-15	2015-11	November	2015	2015.75
1303	1303	2015-11-15	7.28	Paul Smith's College VIC	pscvic_1	2015-11-15	2015-11	November	2015	2015.75
1304	1304	2015-11-15 02:00:00	7.481	Paul Smith's College VIC	pscvic_1	2015-11-15	2015-11	November	2015	2015.75
1305	1305	2015-11-15 04:00:00	7.782	Paul Smith's College VIC	pscvic_1	2015-11-15	2015-11	November	2015	2015.75
1306	1306	2015-11-15 06:00:00	5.757	Paul Smith's College VIC	pscvic_1	2015-11-15	2015-11	November	2015	2015.75
1307	1307	2015-11-15 08:00:00	2.195	Paul Smith's College VIC	pscvic_1	2015-11-15	2015-11	November	2015	2015.75
1308	1308	2015-11-15 10:00:00	4.207	Paul Smith's College VIC	pscvic_1	2015-11-15	2015-11	November	2015	2015.75
1309	1309	2015-11-16	3.788	Paul Smith's College VIC	pscvic_1	2015-11-16	2015-11	November	2015	2015.75
1310	1310	2015-11-16 02:00:00	4.311	Paul Smith's College VIC	pscvic_1	2015-11-16	2015-11	November	2015	2015.75
1311	1311	2015-11-16 04:00:00	3.998	Paul Smith's College VIC	pscvic_1	2015-11-16	2015-11	November	2015	2015.75
1312	1312	2015-11-16 06:00:00	3.788	Paul Smith's College VIC	pscvic_1	2015-11-16	2015-11	November	2015	2015.75
1313	1313	2015-11-16 08:00:00	3.049	Paul Smith's College VIC	pscvic_1	2015-11-16	2015-11	November	2015	2015.75
1314	1314	2015-11-16 10:00:00	6.166	Paul Smith's College VIC	pscvic_1	2015-11-16	2015-11	November	2015	2015.75
1315	1315	2015-11-16	9.077	Paul Smith's College VIC	pscvic_1	2015-11-16	2015-11	November	2015	2015.75
1316	1316	2015-11-16 02:00:00	9.768	Paul Smith's College VIC	pscvic_1	2015-11-16	2015-11	November	2015	2015.75
1317	1317	2015-11-16 04:00:00	7.782	Paul Smith's College VIC	pscvic_1	2015-11-16	2015-11	November	2015	2015.75
1318	1318	2015-11-16 06:00:00	-0.325	Paul Smith's College VIC	pscvic_1	2015-11-16	2015-11	November	2015	2015.75
1319	1319	2015-11-16 08:00:00	-2.03	Paul Smith's College VIC	pscvic_1	2015-11-16	2015-11	November	2015	2015.75
1320	1320	2015-11-16 10:00:00	-5.87	Paul Smith's College VIC	pscvic_1	2015-11-16	2015-11	November	2015	2015.75
1321	1321	2015-11-17	-3.911	Paul Smith's College VIC	pscvic_1	2015-11-17	2015-11	November	2015	2015.75
1322	1322	2015-11-17 02:00:00	-7.918	Paul Smith's College VIC	pscvic_1	2015-11-17	2015-11	November	2015	2015.75
1323	1323	2015-11-17 04:00:00	-9.252	Paul Smith's College VIC	pscvic_1	2015-11-17	2015-11	November	2015	2015.75
1324	1324	2015-11-17 06:00:00	-10.774	Paul Smith's College VIC	pscvic_1	2015-11-17	2015-11	November	2015	2015.75
1325	1325	2015-11-17 08:00:00	-12.214	Paul Smith's College VIC	pscvic_1	2015-11-17	2015-11	November	2015	2015.75
1326	1326	2015-11-17 10:00:00	-0.549	Paul Smith's College VIC	pscvic_1	2015-11-17	2015-11	November	2015	2015.75
1327	1327	2015-11-17	4.727	Paul Smith's College VIC	pscvic_1	2015-11-17	2015-11	November	2015	2015.75
1328	1328	2015-11-17 02:00:00	9.768	Paul Smith's College VIC	pscvic_1	2015-11-17	2015-11	November	2015	2015.75
1329	1329	2015-11-17 04:00:00	8.382	Paul Smith's College VIC	pscvic_1	2015-11-17	2015-11	November	2015	2015.75
1330	1330	2015-11-17 06:00:00	-4.393	Paul Smith's College VIC	pscvic_1	2015-11-17	2015-11	November	2015	2015.75
1331	1331	2015-11-17 08:00:00	-6.882	Paul Smith's College VIC	pscvic_1	2015-11-17	2015-11	November	2015	2015.75
1332	1332	2015-11-17 10:00:00	-9.117	Paul Smith's College VIC	pscvic_1	2015-11-17	2015-11	November	2015	2015.75
1333	1333	2015-11-18	-9.525	Paul Smith's College VIC	pscvic_1	2015-11-18	2015-11	November	2015	2015.75
1334	1334	2015-11-18 02:00:00	-11.631	Paul Smith's College VIC	pscvic_1	2015-11-18	2015-11	November	2015	2015.75
1335	1335	2015-11-18 04:00:00	-12.509	Paul Smith's College VIC	pscvic_1	2015-11-18	2015-11	November	2015	2015.75
1336	1336	2015-11-18 06:00:00	-12.361	Paul Smith's College VIC	pscvic_1	2015-11-18	2015-11	November	2015	2015.75
1337	1337	2015-11-18 08:00:00	-10.214	Paul Smith's College VIC	pscvic_1	2015-11-18	2015-11	November	2015	2015.75
1338	1338	2015-11-18 10:00:00	0.453	Paul Smith's College VIC	pscvic_1	2015-11-18	2015-11	November	2015	2015.75
1339	1339	2015-11-18	9.571	Paul Smith's College VIC	pscvic_1	2015-11-18	2015-11	November	2015	2015.75
1340	1340	2015-11-18 02:00:00	11.916	Paul Smith's College VIC	pscvic_1	2015-11-18	2015-11	November	2015	2015.75
1341	1341	2015-11-18 04:00:00	9.472	Paul Smith's College VIC	pscvic_1	2015-11-18	2015-11	November	2015	2015.75
1342	1342	2015-11-18 06:00:00	6.471	Paul Smith's College VIC	pscvic_1	2015-11-18	2015-11	November	2015	2015.75
1343	1343	2015-11-18 08:00:00	5.347	Paul Smith's College VIC	pscvic_1	2015-11-18	2015-11	November	2015	2015.75
1344	1344	2015-11-18 10:00:00	8.68	Paul Smith's College VIC	pscvic_1	2015-11-18	2015-11	November	2015	2015.75
1345	1345	2015-11-19	7.882	Paul Smith's College VIC	pscvic_1	2015-11-19	2015-11	November	2015	2015.75
1346	1346	2015-11-19 02:00:00	8.182	Paul Smith's College VIC	pscvic_1	2015-11-19	2015-11	November	2015	2015.75
1347	1347	2015-11-19 04:00:00	8.68	Paul Smith's College VIC	pscvic_1	2015-11-19	2015-11	November	2015	2015.75
1348	1348	2015-11-19 06:00:00	9.472	Paul Smith's College VIC	pscvic_1	2015-11-19	2015-11	November	2015	2015.75
1349	1349	2015-11-19 08:00:00	9.669	Paul Smith's College VIC	pscvic_1	2015-11-19	2015-11	November	2015	2015.75
1350	1350	2015-11-19 10:00:00	12.013	Paul Smith's College VIC	pscvic_1	2015-11-19	2015-11	November	2015	2015.75
1351	1351	2015-11-19	13.846	Paul Smith's College VIC	pscvic_1	2015-11-19	2015-11	November	2015	2015.75
1352	1352	2015-11-19 02:00:00	14.23	Paul Smith's College VIC	pscvic_1	2015-11-19	2015-11	November	2015	2015.75
1353	1353	2015-11-19 04:00:00	12.787	Paul Smith's College VIC	pscvic_1	2015-11-19	2015-11	November	2015	2015.75
1354	1354	2015-11-19 06:00:00	11.916	Paul Smith's College VIC	pscvic_1	2015-11-19	2015-11	November	2015	2015.75
1355	1355	2015-11-19 08:00:00	12.594	Paul Smith's College VIC	pscvic_1	2015-11-19	2015-11	November	2015	2015.75
1356	1356	2015-11-19 10:00:00	11.625	Paul Smith's College VIC	pscvic_1	2015-11-19	2015-11	November	2015	2015.75
1357	1357	2015-11-20	8.779	Paul Smith's College VIC	pscvic_1	2015-11-20	2015-11	November	2015	2015.75
1358	1358	2015-11-20 02:00:00	7.782	Paul Smith's College VIC	pscvic_1	2015-11-20	2015-11	November	2015	2015.75
1359	1359	2015-11-20 04:00:00	5.037	Paul Smith's College VIC	pscvic_1	2015-11-20	2015-11	November	2015	2015.75
1360	1360	2015-11-20 06:00:00	2.943	Paul Smith's College VIC	pscvic_1	2015-11-20	2015-11	November	2015	2015.75
1361	1361	2015-11-20 08:00:00	0.674	Paul Smith's College VIC	pscvic_1	2015-11-20	2015-11	November	2015	2015.75
1362	1362	2015-11-20 10:00:00	4.831	Paul Smith's College VIC	pscvic_1	2015-11-20	2015-11	November	2015	2015.75
1363	1363	2015-11-20	5.45	Paul Smith's College VIC	pscvic_1	2015-11-20	2015-11	November	2015	2015.75
1364	1364	2015-11-20 02:00:00	3.788	Paul Smith's College VIC	pscvic_1	2015-11-20	2015-11	November	2015	2015.75
1365	1365	2015-11-20 04:00:00	4.519	Paul Smith's College VIC	pscvic_1	2015-11-20	2015-11	November	2015	2015.75
1366	1366	2015-11-20 06:00:00	1.003	Paul Smith's College VIC	pscvic_1	2015-11-20	2015-11	November	2015	2015.75
1367	1367	2015-11-20 08:00:00	-2.494	Paul Smith's College VIC	pscvic_1	2015-11-20	2015-11	November	2015	2015.75
1368	1368	2015-11-20 10:00:00	-4.88	Paul Smith's College VIC	pscvic_1	2015-11-20	2015-11	November	2015	2015.75
1369	1369	2015-11-21	-6.12	Paul Smith's College VIC	pscvic_1	2015-11-21	2015-11	November	2015	2015.75
1370	1370	2015-11-21 02:00:00	-7.397	Paul Smith's College VIC	pscvic_1	2015-11-21	2015-11	November	2015	2015.75
1371	1371	2015-11-21 04:00:00	-7.787	Paul Smith's College VIC	pscvic_1	2015-11-21	2015-11	November	2015	2015.75
1372	1372	2015-11-21 06:00:00	-8.314	Paul Smith's College VIC	pscvic_1	2015-11-21	2015-11	November	2015	2015.75
1373	1373	2015-11-21 08:00:00	-6.882	Paul Smith's College VIC	pscvic_1	2015-11-21	2015-11	November	2015	2015.75
1374	1374	2015-11-21 10:00:00	0.563	Paul Smith's College VIC	pscvic_1	2015-11-21	2015-11	November	2015	2015.75
1375	1375	2015-11-21	3.578	Paul Smith's College VIC	pscvic_1	2015-11-21	2015-11	November	2015	2015.75
1376	1376	2015-11-21 02:00:00	3.788	Paul Smith's College VIC	pscvic_1	2015-11-21	2015-11	November	2015	2015.75
1377	1377	2015-11-21 04:00:00	2.73	Paul Smith's College VIC	pscvic_1	2015-11-21	2015-11	November	2015	2015.75
1378	1378	2015-11-21 06:00:00	0.674	Paul Smith's College VIC	pscvic_1	2015-11-21	2015-11	November	2015	2015.75
1379	1379	2015-11-21 08:00:00	-1.228	Paul Smith's College VIC	pscvic_1	2015-11-21	2015-11	November	2015	2015.75
1380	1380	2015-11-21 10:00:00	2.088	Paul Smith's College VIC	pscvic_1	2015-11-21	2015-11	November	2015	2015.75
1381	1381	2015-11-22	3.049	Paul Smith's College VIC	pscvic_1	2015-11-22	2015-11	November	2015	2015.75
1382	1382	2015-11-22 02:00:00	3.472	Paul Smith's College VIC	pscvic_1	2015-11-22	2015-11	November	2015	2015.75
1383	1383	2015-11-22 04:00:00	3.578	Paul Smith's College VIC	pscvic_1	2015-11-22	2015-11	November	2015	2015.75
1384	1384	2015-11-22 06:00:00	4.102	Paul Smith's College VIC	pscvic_1	2015-11-22	2015-11	November	2015	2015.75
1385	1385	2015-11-22 08:00:00	2.624	Paul Smith's College VIC	pscvic_1	2015-11-22	2015-11	November	2015	2015.75
1386	1386	2015-11-22 10:00:00	3.472	Paul Smith's College VIC	pscvic_1	2015-11-22	2015-11	November	2015	2015.75
1387	1387	2015-11-22	4.727	Paul Smith's College VIC	pscvic_1	2015-11-22	2015-11	November	2015	2015.75
1388	1388	2015-11-22 02:00:00	4.623	Paul Smith's College VIC	pscvic_1	2015-11-22	2015-11	November	2015	2015.75
1389	1389	2015-11-22 04:00:00	5.45	Paul Smith's College VIC	pscvic_1	2015-11-22	2015-11	November	2015	2015.75
1390	1390	2015-11-22 06:00:00	0.01	Paul Smith's College VIC	pscvic_1	2015-11-22	2015-11	November	2015	2015.75
1391	1391	2015-11-22 08:00:00	-1.914	Paul Smith's College VIC	pscvic_1	2015-11-22	2015-11	November	2015	2015.75
1392	1392	2015-11-22 10:00:00	-2.261	Paul Smith's College VIC	pscvic_1	2015-11-22	2015-11	November	2015	2015.75
1393	1393	2015-11-23	-3.792	Paul Smith's College VIC	pscvic_1	2015-11-23	2015-11	November	2015	2015.75
1394	1394	2015-11-23 02:00:00	-5.62	Paul Smith's College VIC	pscvic_1	2015-11-23	2015-11	November	2015	2015.75
1395	1395	2015-11-23 04:00:00	-6.626	Paul Smith's College VIC	pscvic_1	2015-11-23	2015-11	November	2015	2015.75
1396	1396	2015-11-23 06:00:00	-7.397	Paul Smith's College VIC	pscvic_1	2015-11-23	2015-11	November	2015	2015.75
1397	1397	2015-11-23 08:00:00	-9.525	Paul Smith's College VIC	pscvic_1	2015-11-23	2015-11	November	2015	2015.75
1398	1398	2015-11-23 10:00:00	-4.272	Paul Smith's College VIC	pscvic_1	2015-11-23	2015-11	November	2015	2015.75
1399	1399	2015-11-23	-1.001	Paul Smith's College VIC	pscvic_1	2015-11-23	2015-11	November	2015	2015.75
1400	1400	2015-11-23 02:00:00	-0.213	Paul Smith's College VIC	pscvic_1	2015-11-23	2015-11	November	2015	2015.75
1401	1401	2015-11-23 04:00:00	-1.114	Paul Smith's College VIC	pscvic_1	2015-11-23	2015-11	November	2015	2015.75
1402	1402	2015-11-23 06:00:00	-4.272	Paul Smith's College VIC	pscvic_1	2015-11-23	2015-11	November	2015	2015.75
1403	1403	2015-11-23 08:00:00	-7.267	Paul Smith's College VIC	pscvic_1	2015-11-23	2015-11	November	2015	2015.75
1404	1404	2015-11-23 10:00:00	-12.956	Paul Smith's College VIC	pscvic_1	2015-11-23	2015-11	November	2015	2015.75
1405	1405	2015-11-24	-14.334	Paul Smith's College VIC	pscvic_1	2015-11-24	2015-11	November	2015	2015.75
1406	1406	2015-11-24 02:00:00	-13.715	Paul Smith's College VIC	pscvic_1	2015-11-24	2015-11	November	2015	2015.75
1407	1407	2015-11-24 04:00:00	-9.117	Paul Smith's College VIC	pscvic_1	2015-11-24	2015-11	November	2015	2015.75
1408	1408	2015-11-24 06:00:00	-6.626	Paul Smith's College VIC	pscvic_1	2015-11-24	2015-11	November	2015	2015.75
1409	1409	2015-11-24 08:00:00	-5.125	Paul Smith's College VIC	pscvic_1	2015-11-24	2015-11	November	2015	2015.75
1410	1410	2015-11-24 10:00:00	-2.261	Paul Smith's College VIC	pscvic_1	2015-11-24	2015-11	November	2015	2015.75
1411	1411	2015-11-24	-1.456	Paul Smith's College VIC	pscvic_1	2015-11-24	2015-11	November	2015	2015.75
1412	1412	2015-11-24 02:00:00	-0.662	Paul Smith's College VIC	pscvic_1	2015-11-24	2015-11	November	2015	2015.75
1413	1413	2015-11-24 04:00:00	-1.341	Paul Smith's College VIC	pscvic_1	2015-11-24	2015-11	November	2015	2015.75
1414	1414	2015-11-24 06:00:00	-2.377	Paul Smith's College VIC	pscvic_1	2015-11-24	2015-11	November	2015	2015.75
1415	1415	2015-11-24 08:00:00	-5.995	Paul Smith's College VIC	pscvic_1	2015-11-24	2015-11	November	2015	2015.75
1416	1416	2015-11-24 10:00:00	-4.152	Paul Smith's College VIC	pscvic_1	2015-11-24	2015-11	November	2015	2015.75
1417	1417	2015-11-25	-4.152	Paul Smith's College VIC	pscvic_1	2015-11-25	2015-11	November	2015	2015.75
1418	1418	2015-11-25 02:00:00	-6.12	Paul Smith's College VIC	pscvic_1	2015-11-25	2015-11	November	2015	2015.75
1419	1419	2015-11-25 04:00:00	-7.01	Paul Smith's College VIC	pscvic_1	2015-11-25	2015-11	November	2015	2015.75
1420	1420	2015-11-25 06:00:00	-7.787	Paul Smith's College VIC	pscvic_1	2015-11-25	2015-11	November	2015	2015.75
1421	1421	2015-11-25 08:00:00	-5.995	Paul Smith's College VIC	pscvic_1	2015-11-25	2015-11	November	2015	2015.75
1422	1422	2015-11-25 10:00:00	-1.341	Paul Smith's College VIC	pscvic_1	2015-11-25	2015-11	November	2015	2015.75
1423	1423	2015-11-25	3.155	Paul Smith's College VIC	pscvic_1	2015-11-25	2015-11	November	2015	2015.75
1424	1424	2015-11-25 02:00:00	5.757	Paul Smith's College VIC	pscvic_1	2015-11-25	2015-11	November	2015	2015.75
1425	1425	2015-11-25 04:00:00	6.37	Paul Smith's College VIC	pscvic_1	2015-11-25	2015-11	November	2015	2015.75
1426	1426	2015-11-25 06:00:00	-2.727	Paul Smith's College VIC	pscvic_1	2015-11-25	2015-11	November	2015	2015.75
1427	1427	2015-11-25 08:00:00	-2.962	Paul Smith's College VIC	pscvic_1	2015-11-25	2015-11	November	2015	2015.75
1428	1428	2015-11-25 10:00:00	-5.125	Paul Smith's College VIC	pscvic_1	2015-11-25	2015-11	November	2015	2015.75
1429	1429	2015-11-26	1.112	Paul Smith's College VIC	pscvic_1	2015-11-26	2015-11	November	2015	2015.75
1430	1430	2015-11-26 02:00:00	2.303	Paul Smith's College VIC	pscvic_1	2015-11-26	2015-11	November	2015	2015.75
1431	1431	2015-11-26 04:00:00	1.439	Paul Smith's College VIC	pscvic_1	2015-11-26	2015-11	November	2015	2015.75
1432	1432	2015-11-26 06:00:00	1.656	Paul Smith's College VIC	pscvic_1	2015-11-26	2015-11	November	2015	2015.75
1433	1433	2015-11-26 08:00:00	1.33	Paul Smith's College VIC	pscvic_1	2015-11-26	2015-11	November	2015	2015.75
1434	1434	2015-11-26 10:00:00	3.893	Paul Smith's College VIC	pscvic_1	2015-11-26	2015-11	November	2015	2015.75
1435	1435	2015-11-26	6.471	Paul Smith's College VIC	pscvic_1	2015-11-26	2015-11	November	2015	2015.75
1436	1436	2015-11-26 02:00:00	10.063	Paul Smith's College VIC	pscvic_1	2015-11-26	2015-11	November	2015	2015.75
1437	1437	2015-11-26 04:00:00	8.68	Paul Smith's College VIC	pscvic_1	2015-11-26	2015-11	November	2015	2015.75
1438	1438	2015-11-26 06:00:00	6.877	Paul Smith's College VIC	pscvic_1	2015-11-26	2015-11	November	2015	2015.75
1439	1439	2015-11-26 08:00:00	6.471	Paul Smith's College VIC	pscvic_1	2015-11-26	2015-11	November	2015	2015.75
1440	1440	2015-11-26 10:00:00	5.552	Paul Smith's College VIC	pscvic_1	2015-11-26	2015-11	November	2015	2015.75
1441	1441	2015-11-27	7.079	Paul Smith's College VIC	pscvic_1	2015-11-27	2015-11	November	2015	2015.75
1442	1442	2015-11-27 02:00:00	6.471	Paul Smith's College VIC	pscvic_1	2015-11-27	2015-11	November	2015	2015.75
1443	1443	2015-11-27 04:00:00	7.582	Paul Smith's College VIC	pscvic_1	2015-11-27	2015-11	November	2015	2015.75
1444	1444	2015-11-27 06:00:00	8.282	Paul Smith's College VIC	pscvic_1	2015-11-27	2015-11	November	2015	2015.75
1445	1445	2015-11-27 08:00:00	9.176	Paul Smith's College VIC	pscvic_1	2015-11-27	2015-11	November	2015	2015.75
1446	1446	2015-11-27 10:00:00	10.357	Paul Smith's College VIC	pscvic_1	2015-11-27	2015-11	November	2015	2015.75
1447	1447	2015-11-27	12.594	Paul Smith's College VIC	pscvic_1	2015-11-27	2015-11	November	2015	2015.75
1448	1448	2015-11-27 02:00:00	14.517	Paul Smith's College VIC	pscvic_1	2015-11-27	2015-11	November	2015	2015.75
1449	1449	2015-11-27 04:00:00	12.98	Paul Smith's College VIC	pscvic_1	2015-11-27	2015-11	November	2015	2015.75
1450	1450	2015-11-27 06:00:00	10.651	Paul Smith's College VIC	pscvic_1	2015-11-27	2015-11	November	2015	2015.75
1451	1451	2015-11-27 08:00:00	9.965	Paul Smith's College VIC	pscvic_1	2015-11-27	2015-11	November	2015	2015.75
1452	1452	2015-11-27 10:00:00	4.415	Paul Smith's College VIC	pscvic_1	2015-11-27	2015-11	November	2015	2015.75
1453	1453	2015-11-28	1.656	Paul Smith's College VIC	pscvic_1	2015-11-28	2015-11	November	2015	2015.75
1454	1454	2015-11-28 02:00:00	0.232	Paul Smith's College VIC	pscvic_1	2015-11-28	2015-11	November	2015	2015.75
1455	1455	2015-11-28 04:00:00	-0.549	Paul Smith's College VIC	pscvic_1	2015-11-28	2015-11	November	2015	2015.75
1456	1456	2015-11-28 06:00:00	-0.774	Paul Smith's College VIC	pscvic_1	2015-11-28	2015-11	November	2015	2015.75
1457	1457	2015-11-28 08:00:00	-1.456	Paul Smith's College VIC	pscvic_1	2015-11-28	2015-11	November	2015	2015.75
1458	1458	2015-11-28 10:00:00	-1.114	Paul Smith's College VIC	pscvic_1	2015-11-28	2015-11	November	2015	2015.75
1459	1459	2015-11-28	-0.662	Paul Smith's College VIC	pscvic_1	2015-11-28	2015-11	November	2015	2015.75
1460	1460	2015-11-28 02:00:00	0.01	Paul Smith's College VIC	pscvic_1	2015-11-28	2015-11	November	2015	2015.75
1461	1461	2015-11-28 04:00:00	-1.799	Paul Smith's College VIC	pscvic_1	2015-11-28	2015-11	November	2015	2015.75
1462	1462	2015-11-28 06:00:00	-2.962	Paul Smith's College VIC	pscvic_1	2015-11-28	2015-11	November	2015	2015.75
1463	1463	2015-11-28 08:00:00	-4.152	Paul Smith's College VIC	pscvic_1	2015-11-28	2015-11	November	2015	2015.75
1464	1464	2015-11-28 10:00:00	-4.152	Paul Smith's College VIC	pscvic_1	2015-11-28	2015-11	November	2015	2015.75
1465	1465	2015-11-29	-5.372	Paul Smith's College VIC	pscvic_1	2015-11-29	2015-11	November	2015	2015.75
1466	1466	2015-11-29 02:00:00	-6.12	Paul Smith's College VIC	pscvic_1	2015-11-29	2015-11	November	2015	2015.75
1467	1467	2015-11-29 04:00:00	-10.493	Paul Smith's College VIC	pscvic_1	2015-11-29	2015-11	November	2015	2015.75
1468	1468	2015-11-29 06:00:00	-11.631	Paul Smith's College VIC	pscvic_1	2015-11-29	2015-11	November	2015	2015.75
1469	1469	2015-11-29 08:00:00	-5.62	Paul Smith's College VIC	pscvic_1	2015-11-29	2015-11	November	2015	2015.75
1470	1470	2015-11-29 10:00:00	-3.911	Paul Smith's College VIC	pscvic_1	2015-11-29	2015-11	November	2015	2015.75
1471	1471	2015-11-29	-1.456	Paul Smith's College VIC	pscvic_1	2015-11-29	2015-11	November	2015	2015.75
1472	1472	2015-11-29 02:00:00	-0.549	Paul Smith's College VIC	pscvic_1	2015-11-29	2015-11	November	2015	2015.75
1473	1473	2015-11-29 04:00:00	-2.377	Paul Smith's College VIC	pscvic_1	2015-11-29	2015-11	November	2015	2015.75
1474	1474	2015-11-29 06:00:00	-3.911	Paul Smith's College VIC	pscvic_1	2015-11-29	2015-11	November	2015	2015.75
1475	1475	2015-11-29 08:00:00	-4.758	Paul Smith's College VIC	pscvic_1	2015-11-29	2015-11	November	2015	2015.75
1476	1476	2015-11-29 10:00:00	-4.636	Paul Smith's College VIC	pscvic_1	2015-11-29	2015-11	November	2015	2015.75
1477	1477	2015-11-30	-6.754	Paul Smith's College VIC	pscvic_1	2015-11-30	2015-11	November	2015	2015.75
1478	1478	2015-11-30 02:00:00	-5.745	Paul Smith's College VIC	pscvic_1	2015-11-30	2015-11	November	2015	2015.75
1479	1479	2015-11-30 04:00:00	-6.373	Paul Smith's College VIC	pscvic_1	2015-11-30	2015-11	November	2015	2015.75
1480	1480	2015-11-30 06:00:00	-12.509	Paul Smith's College VIC	pscvic_1	2015-11-30	2015-11	November	2015	2015.75
1481	1481	2015-11-30 08:00:00	-13.715	Paul Smith's College VIC	pscvic_1	2015-11-30	2015-11	November	2015	2015.75
1482	1482	2015-11-30 10:00:00	-7.01	Paul Smith's College VIC	pscvic_1	2015-11-30	2015-11	November	2015	2015.75
1483	1483	2015-11-30	-2.261	Paul Smith's College VIC	pscvic_1	2015-11-30	2015-11	November	2015	2015.75
1484	1484	2015-11-30 02:00:00	1.112	Paul Smith's College VIC	pscvic_1	2015-11-30	2015-11	November	2015	2015.75
1485	1485	2015-11-30 04:00:00	1.764	Paul Smith's College VIC	pscvic_1	2015-11-30	2015-11	November	2015	2015.75
1486	1486	2015-11-30 06:00:00	-7.657	Paul Smith's College VIC	pscvic_1	2015-11-30	2015-11	November	2015	2015.75
1487	1487	2015-11-30 08:00:00	-11.058	Paul Smith's College VIC	pscvic_1	2015-11-30	2015-11	November	2015	2015.75
1488	1488	2015-11-30 10:00:00	-12.509	Paul Smith's College VIC	pscvic_1	2015-11-30	2015-11	November	2015	2015.75
1489	1489	2015-12-01	-13.258	Paul Smith's College VIC	pscvic_1	2015-12-01	2015-12	December	2015	2015.75
1490	1490	2015-12-01 02:00:00	-13.562	Paul Smith's College VIC	pscvic_1	2015-12-01	2015-12	December	2015	2015.75
1491	1491	2015-12-01 04:00:00	-12.509	Paul Smith's College VIC	pscvic_1	2015-12-01	2015-12	December	2015	2015.75
1492	1492	2015-12-01 06:00:00	-13.107	Paul Smith's College VIC	pscvic_1	2015-12-01	2015-12	December	2015	2015.75
1493	1493	2015-12-01 08:00:00	-13.107	Paul Smith's College VIC	pscvic_1	2015-12-01	2015-12	December	2015	2015.75
1494	1494	2015-12-01 10:00:00	-5.249	Paul Smith's College VIC	pscvic_1	2015-12-01	2015-12	December	2015	2015.75
1495	1495	2015-12-01	-0.102	Paul Smith's College VIC	pscvic_1	2015-12-01	2015-12	December	2015	2015.75
1496	1496	2015-12-01 02:00:00	1.003	Paul Smith's College VIC	pscvic_1	2015-12-01	2015-12	December	2015	2015.75
1497	1497	2015-12-01 04:00:00	1.764	Paul Smith's College VIC	pscvic_1	2015-12-01	2015-12	December	2015	2015.75
1498	1498	2015-12-01 06:00:00	2.088	Paul Smith's College VIC	pscvic_1	2015-12-01	2015-12	December	2015	2015.75
1499	1499	2015-12-01 08:00:00	2.943	Paul Smith's College VIC	pscvic_1	2015-12-01	2015-12	December	2015	2015.75
1500	1500	2015-12-01 10:00:00	3.683	Paul Smith's College VIC	pscvic_1	2015-12-01	2015-12	December	2015	2015.75
1501	1501	2015-12-02	4.207	Paul Smith's College VIC	pscvic_1	2015-12-02	2015-12	December	2015	2015.75
1502	1502	2015-12-02 02:00:00	4.415	Paul Smith's College VIC	pscvic_1	2015-12-02	2015-12	December	2015	2015.75
1503	1503	2015-12-02 04:00:00	5.347	Paul Smith's College VIC	pscvic_1	2015-12-02	2015-12	December	2015	2015.75
1504	1504	2015-12-02 06:00:00	5.45	Paul Smith's College VIC	pscvic_1	2015-12-02	2015-12	December	2015	2015.75
1505	1505	2015-12-02 08:00:00	5.655	Paul Smith's College VIC	pscvic_1	2015-12-02	2015-12	December	2015	2015.75
1506	1506	2015-12-02 10:00:00	6.573	Paul Smith's College VIC	pscvic_1	2015-12-02	2015-12	December	2015	2015.75
1507	1507	2015-12-02	6.877	Paul Smith's College VIC	pscvic_1	2015-12-02	2015-12	December	2015	2015.75
1508	1508	2015-12-02 02:00:00	6.775	Paul Smith's College VIC	pscvic_1	2015-12-02	2015-12	December	2015	2015.75
1509	1509	2015-12-02 04:00:00	6.064	Paul Smith's College VIC	pscvic_1	2015-12-02	2015-12	December	2015	2015.75
1510	1510	2015-12-02 06:00:00	4.831	Paul Smith's College VIC	pscvic_1	2015-12-02	2015-12	December	2015	2015.75
1511	1511	2015-12-02 08:00:00	3.472	Paul Smith's College VIC	pscvic_1	2015-12-02	2015-12	December	2015	2015.75
1512	1512	2015-12-02 10:00:00	2.943	Paul Smith's College VIC	pscvic_1	2015-12-02	2015-12	December	2015	2015.75
1513	1513	2015-12-03	0.784	Paul Smith's College VIC	pscvic_1	2015-12-03	2015-12	December	2015	2015.75
1514	1514	2015-12-03 02:00:00	0.121	Paul Smith's College VIC	pscvic_1	2015-12-03	2015-12	December	2015	2015.75
1515	1515	2015-12-03 04:00:00	0.121	Paul Smith's College VIC	pscvic_1	2015-12-03	2015-12	December	2015	2015.75
1516	1516	2015-12-03 06:00:00	0.121	Paul Smith's College VIC	pscvic_1	2015-12-03	2015-12	December	2015	2015.75
1517	1517	2015-12-03 08:00:00	-0.102	Paul Smith's College VIC	pscvic_1	2015-12-03	2015-12	December	2015	2015.75
1518	1518	2015-12-03 10:00:00	0.01	Paul Smith's College VIC	pscvic_1	2015-12-03	2015-12	December	2015	2015.75
1519	1519	2015-12-03	0.784	Paul Smith's College VIC	pscvic_1	2015-12-03	2015-12	December	2015	2015.75
1520	1520	2015-12-03 02:00:00	1.33	Paul Smith's College VIC	pscvic_1	2015-12-03	2015-12	December	2015	2015.75
1521	1521	2015-12-03 04:00:00	0.232	Paul Smith's College VIC	pscvic_1	2015-12-03	2015-12	December	2015	2015.75
1522	1522	2015-12-03 06:00:00	0.121	Paul Smith's College VIC	pscvic_1	2015-12-03	2015-12	December	2015	2015.75
1523	1523	2015-12-03 08:00:00	-0.102	Paul Smith's College VIC	pscvic_1	2015-12-03	2015-12	December	2015	2015.75
1524	1524	2015-12-03 10:00:00	-0.774	Paul Smith's College VIC	pscvic_1	2015-12-03	2015-12	December	2015	2015.75
1525	1525	2015-12-04	-1.341	Paul Smith's College VIC	pscvic_1	2015-12-04	2015-12	December	2015	2015.75
1526	1526	2015-12-04 02:00:00	-1.456	Paul Smith's College VIC	pscvic_1	2015-12-04	2015-12	December	2015	2015.75
1527	1527	2015-12-04 04:00:00	-1.341	Paul Smith's College VIC	pscvic_1	2015-12-04	2015-12	December	2015	2015.75
1528	1528	2015-12-04 06:00:00	-1.341	Paul Smith's College VIC	pscvic_1	2015-12-04	2015-12	December	2015	2015.75
1529	1529	2015-12-04 08:00:00	-0.887	Paul Smith's College VIC	pscvic_1	2015-12-04	2015-12	December	2015	2015.75
1530	1530	2015-12-04 10:00:00	0.343	Paul Smith's College VIC	pscvic_1	2015-12-04	2015-12	December	2015	2015.75
1531	1531	2015-12-04	1.221	Paul Smith's College VIC	pscvic_1	2015-12-04	2015-12	December	2015	2015.75
1532	1532	2015-12-04 02:00:00	1.33	Paul Smith's College VIC	pscvic_1	2015-12-04	2015-12	December	2015	2015.75
1533	1533	2015-12-04 04:00:00	1.33	Paul Smith's College VIC	pscvic_1	2015-12-04	2015-12	December	2015	2015.75
1534	1534	2015-12-04 06:00:00	1.112	Paul Smith's College VIC	pscvic_1	2015-12-04	2015-12	December	2015	2015.75
1535	1535	2015-12-04 08:00:00	1.33	Paul Smith's College VIC	pscvic_1	2015-12-04	2015-12	December	2015	2015.75
1536	1536	2015-12-04 10:00:00	1.439	Paul Smith's College VIC	pscvic_1	2015-12-04	2015-12	December	2015	2015.75
1537	1537	2015-12-05	1.656	Paul Smith's College VIC	pscvic_1	2015-12-05	2015-12	December	2015	2015.75
1538	1538	2015-12-05 02:00:00	1.656	Paul Smith's College VIC	pscvic_1	2015-12-05	2015-12	December	2015	2015.75
1539	1539	2015-12-05 04:00:00	1.439	Paul Smith's College VIC	pscvic_1	2015-12-05	2015-12	December	2015	2015.75
1540	1540	2015-12-05 06:00:00	1.33	Paul Smith's College VIC	pscvic_1	2015-12-05	2015-12	December	2015	2015.75
1541	1541	2015-12-05 08:00:00	1.003	Paul Smith's College VIC	pscvic_1	2015-12-05	2015-12	December	2015	2015.75
1542	1542	2015-12-05 10:00:00	1.872	Paul Smith's College VIC	pscvic_1	2015-12-05	2015-12	December	2015	2015.75
1543	1543	2015-12-05	3.367	Paul Smith's College VIC	pscvic_1	2015-12-05	2015-12	December	2015	2015.75
1544	1544	2015-12-05 02:00:00	4.311	Paul Smith's College VIC	pscvic_1	2015-12-05	2015-12	December	2015	2015.75
1545	1545	2015-12-05 04:00:00	3.472	Paul Smith's College VIC	pscvic_1	2015-12-05	2015-12	December	2015	2015.75
1546	1546	2015-12-05 06:00:00	-0.549	Paul Smith's College VIC	pscvic_1	2015-12-05	2015-12	December	2015	2015.75
1547	1547	2015-12-05 08:00:00	-2.494	Paul Smith's College VIC	pscvic_1	2015-12-05	2015-12	December	2015	2015.75
1548	1548	2015-12-05 10:00:00	-0.102	Paul Smith's College VIC	pscvic_1	2015-12-05	2015-12	December	2015	2015.75
1549	1549	2015-12-06	-0.549	Paul Smith's College VIC	pscvic_1	2015-12-06	2015-12	December	2015	2015.75
1550	1550	2015-12-06 02:00:00	-1.114	Paul Smith's College VIC	pscvic_1	2015-12-06	2015-12	December	2015	2015.75
1551	1551	2015-12-06 04:00:00	-1.684	Paul Smith's College VIC	pscvic_1	2015-12-06	2015-12	December	2015	2015.75
1552	1552	2015-12-06 06:00:00	-1.799	Paul Smith's College VIC	pscvic_1	2015-12-06	2015-12	December	2015	2015.75
1553	1553	2015-12-06 08:00:00	-2.145	Paul Smith's College VIC	pscvic_1	2015-12-06	2015-12	December	2015	2015.75
1554	1554	2015-12-06 10:00:00	-0.662	Paul Smith's College VIC	pscvic_1	2015-12-06	2015-12	December	2015	2015.75
1555	1555	2015-12-06	5.86	Paul Smith's College VIC	pscvic_1	2015-12-06	2015-12	December	2015	2015.75
1556	1556	2015-12-06 02:00:00	8.581	Paul Smith's College VIC	pscvic_1	2015-12-06	2015-12	December	2015	2015.75
1557	1557	2015-12-06 04:00:00	5.962	Paul Smith's College VIC	pscvic_1	2015-12-06	2015-12	December	2015	2015.75
1558	1558	2015-12-06 06:00:00	-2.494	Paul Smith's College VIC	pscvic_1	2015-12-06	2015-12	December	2015	2015.75
1559	1559	2015-12-06 08:00:00	1.872	Paul Smith's College VIC	pscvic_1	2015-12-06	2015-12	December	2015	2015.75
1560	1560	2015-12-06 10:00:00	-2.377	Paul Smith's College VIC	pscvic_1	2015-12-06	2015-12	December	2015	2015.75
1561	1561	2015-12-07	-2.844	Paul Smith's College VIC	pscvic_1	2015-12-07	2015-12	December	2015	2015.75
1562	1562	2015-12-07 02:00:00	-5.87	Paul Smith's College VIC	pscvic_1	2015-12-07	2015-12	December	2015	2015.75
1563	1563	2015-12-07 04:00:00	-6.882	Paul Smith's College VIC	pscvic_1	2015-12-07	2015-12	December	2015	2015.75
1564	1564	2015-12-07 06:00:00	-1.914	Paul Smith's College VIC	pscvic_1	2015-12-07	2015-12	December	2015	2015.75
1565	1565	2015-12-07 08:00:00	0.121	Paul Smith's College VIC	pscvic_1	2015-12-07	2015-12	December	2015	2015.75
1566	1566	2015-12-07 10:00:00	0.232	Paul Smith's College VIC	pscvic_1	2015-12-07	2015-12	December	2015	2015.75
1567	1567	2015-12-07	1.98	Paul Smith's College VIC	pscvic_1	2015-12-07	2015-12	December	2015	2015.75
1568	1568	2015-12-07 02:00:00	1.872	Paul Smith's College VIC	pscvic_1	2015-12-07	2015-12	December	2015	2015.75
1569	1569	2015-12-07 04:00:00	1.656	Paul Smith's College VIC	pscvic_1	2015-12-07	2015-12	December	2015	2015.75
1570	1570	2015-12-07 06:00:00	0.674	Paul Smith's College VIC	pscvic_1	2015-12-07	2015-12	December	2015	2015.75
1571	1571	2015-12-07 08:00:00	-0.102	Paul Smith's College VIC	pscvic_1	2015-12-07	2015-12	December	2015	2015.75
1572	1572	2015-12-07 10:00:00	-0.437	Paul Smith's College VIC	pscvic_1	2015-12-07	2015-12	December	2015	2015.75
1573	1573	2015-12-08	-0.774	Paul Smith's College VIC	pscvic_1	2015-12-08	2015-12	December	2015	2015.75
1574	1574	2015-12-08 02:00:00	-1.341	Paul Smith's College VIC	pscvic_1	2015-12-08	2015-12	December	2015	2015.75
1575	1575	2015-12-08 04:00:00	-1.456	Paul Smith's College VIC	pscvic_1	2015-12-08	2015-12	December	2015	2015.75
1576	1576	2015-12-08 06:00:00	-1.341	Paul Smith's College VIC	pscvic_1	2015-12-08	2015-12	December	2015	2015.75
1577	1577	2015-12-08 08:00:00	-4.272	Paul Smith's College VIC	pscvic_1	2015-12-08	2015-12	December	2015	2015.75
1578	1578	2015-12-08 10:00:00	-2.727	Paul Smith's College VIC	pscvic_1	2015-12-08	2015-12	December	2015	2015.75
1579	1579	2015-12-08	4.934	Paul Smith's College VIC	pscvic_1	2015-12-08	2015-12	December	2015	2015.75
1580	1580	2015-12-08 02:00:00	5.552	Paul Smith's College VIC	pscvic_1	2015-12-08	2015-12	December	2015	2015.75
1581	1581	2015-12-08 04:00:00	3.893	Paul Smith's College VIC	pscvic_1	2015-12-08	2015-12	December	2015	2015.75
1582	1582	2015-12-08 06:00:00	-4.88	Paul Smith's College VIC	pscvic_1	2015-12-08	2015-12	December	2015	2015.75
1583	1583	2015-12-08 08:00:00	-5.62	Paul Smith's College VIC	pscvic_1	2015-12-08	2015-12	December	2015	2015.75
1584	1584	2015-12-08 10:00:00	-7.397	Paul Smith's College VIC	pscvic_1	2015-12-08	2015-12	December	2015	2015.75
1585	1585	2015-12-09	-3.553	Paul Smith's College VIC	pscvic_1	2015-12-09	2015-12	December	2015	2015.75
1586	1586	2015-12-09 02:00:00	-6.626	Paul Smith's College VIC	pscvic_1	2015-12-09	2015-12	December	2015	2015.75
1587	1587	2015-12-09 04:00:00	-2.727	Paul Smith's College VIC	pscvic_1	2015-12-09	2015-12	December	2015	2015.75
1588	1588	2015-12-09 06:00:00	-1.914	Paul Smith's College VIC	pscvic_1	2015-12-09	2015-12	December	2015	2015.75
1589	1589	2015-12-09 08:00:00	-1.684	Paul Smith's College VIC	pscvic_1	2015-12-09	2015-12	December	2015	2015.75
1590	1590	2015-12-09 10:00:00	-0.662	Paul Smith's College VIC	pscvic_1	2015-12-09	2015-12	December	2015	2015.75
1591	1591	2015-12-09	6.877	Paul Smith's College VIC	pscvic_1	2015-12-09	2015-12	December	2015	2015.75
1592	1592	2015-12-09 02:00:00	10.063	Paul Smith's College VIC	pscvic_1	2015-12-09	2015-12	December	2015	2015.75
1593	1593	2015-12-09 04:00:00	6.775	Paul Smith's College VIC	pscvic_1	2015-12-09	2015-12	December	2015	2015.75
1594	1594	2015-12-09 06:00:00	1.548	Paul Smith's College VIC	pscvic_1	2015-12-09	2015-12	December	2015	2015.75
1595	1595	2015-12-09 08:00:00	3.261	Paul Smith's College VIC	pscvic_1	2015-12-09	2015-12	December	2015	2015.75
1596	1596	2015-12-09 10:00:00	3.367	Paul Smith's College VIC	pscvic_1	2015-12-09	2015-12	December	2015	2015.75
1597	1597	2015-12-10	3.472	Paul Smith's College VIC	pscvic_1	2015-12-10	2015-12	December	2015	2015.75
1598	1598	2015-12-10 02:00:00	3.472	Paul Smith's College VIC	pscvic_1	2015-12-10	2015-12	December	2015	2015.75
1599	1599	2015-12-10 04:00:00	4.415	Paul Smith's College VIC	pscvic_1	2015-12-10	2015-12	December	2015	2015.75
1600	1600	2015-12-10 06:00:00	3.998	Paul Smith's College VIC	pscvic_1	2015-12-10	2015-12	December	2015	2015.75
1601	1601	2015-12-10 08:00:00	4.519	Paul Smith's College VIC	pscvic_1	2015-12-10	2015-12	December	2015	2015.75
1602	1602	2015-12-10 10:00:00	5.552	Paul Smith's College VIC	pscvic_1	2015-12-10	2015-12	December	2015	2015.75
1603	1603	2015-12-10	6.471	Paul Smith's College VIC	pscvic_1	2015-12-10	2015-12	December	2015	2015.75
1604	1604	2015-12-10 02:00:00	8.182	Paul Smith's College VIC	pscvic_1	2015-12-10	2015-12	December	2015	2015.75
1605	1605	2015-12-10 04:00:00	7.682	Paul Smith's College VIC	pscvic_1	2015-12-10	2015-12	December	2015	2015.75
1606	1606	2015-12-10 06:00:00	1.548	Paul Smith's College VIC	pscvic_1	2015-12-10	2015-12	December	2015	2015.75
1607	1607	2015-12-10 08:00:00	0.232	Paul Smith's College VIC	pscvic_1	2015-12-10	2015-12	December	2015	2015.75
1608	1608	2015-12-10 10:00:00	-1.341	Paul Smith's College VIC	pscvic_1	2015-12-10	2015-12	December	2015	2015.75
1609	1609	2015-12-11	2.303	Paul Smith's College VIC	pscvic_1	2015-12-11	2015-12	December	2015	2015.75
1610	1610	2015-12-11 02:00:00	2.943	Paul Smith's College VIC	pscvic_1	2015-12-11	2015-12	December	2015	2015.75
1611	1611	2015-12-11 04:00:00	0.453	Paul Smith's College VIC	pscvic_1	2015-12-11	2015-12	December	2015	2015.75
1612	1612	2015-12-11 06:00:00	4.519	Paul Smith's College VIC	pscvic_1	2015-12-11	2015-12	December	2015	2015.75
1613	1613	2015-12-11 08:00:00	0.232	Paul Smith's College VIC	pscvic_1	2015-12-11	2015-12	December	2015	2015.75
1614	1614	2015-12-11 10:00:00	6.978	Paul Smith's College VIC	pscvic_1	2015-12-11	2015-12	December	2015	2015.75
1615	1615	2015-12-11	9.176	Paul Smith's College VIC	pscvic_1	2015-12-11	2015-12	December	2015	2015.75
1616	1616	2015-12-11 02:00:00	12.304	Paul Smith's College VIC	pscvic_1	2015-12-11	2015-12	December	2015	2015.75
1617	1617	2015-12-11 04:00:00	11.431	Paul Smith's College VIC	pscvic_1	2015-12-11	2015-12	December	2015	2015.75
1618	1618	2015-12-11 06:00:00	9.077	Paul Smith's College VIC	pscvic_1	2015-12-11	2015-12	December	2015	2015.75
1619	1619	2015-12-11 08:00:00	9.176	Paul Smith's College VIC	pscvic_1	2015-12-11	2015-12	December	2015	2015.75
1620	1620	2015-12-11 10:00:00	7.682	Paul Smith's College VIC	pscvic_1	2015-12-11	2015-12	December	2015	2015.75
1621	1621	2015-12-12	4.623	Paul Smith's College VIC	pscvic_1	2015-12-12	2015-12	December	2015	2015.75
1622	1622	2015-12-12 02:00:00	4.934	Paul Smith's College VIC	pscvic_1	2015-12-12	2015-12	December	2015	2015.75
1623	1623	2015-12-12 04:00:00	4.831	Paul Smith's College VIC	pscvic_1	2015-12-12	2015-12	December	2015	2015.75
1624	1624	2015-12-12 06:00:00	3.578	Paul Smith's College VIC	pscvic_1	2015-12-12	2015-12	December	2015	2015.75
1625	1625	2015-12-12 08:00:00	3.788	Paul Smith's College VIC	pscvic_1	2015-12-12	2015-12	December	2015	2015.75
1626	1626	2015-12-12 10:00:00	4.727	Paul Smith's College VIC	pscvic_1	2015-12-12	2015-12	December	2015	2015.75
1627	1627	2015-12-12	6.166	Paul Smith's College VIC	pscvic_1	2015-12-12	2015-12	December	2015	2015.75
1628	1628	2015-12-12 02:00:00	7.481	Paul Smith's College VIC	pscvic_1	2015-12-12	2015-12	December	2015	2015.75
1629	1629	2015-12-12 04:00:00	7.882	Paul Smith's College VIC	pscvic_1	2015-12-12	2015-12	December	2015	2015.75
1630	1630	2015-12-12 06:00:00	0.343	Paul Smith's College VIC	pscvic_1	2015-12-12	2015-12	December	2015	2015.75
1631	1631	2015-12-12 08:00:00	1.764	Paul Smith's College VIC	pscvic_1	2015-12-12	2015-12	December	2015	2015.75
1632	1632	2015-12-12 10:00:00	4.102	Paul Smith's College VIC	pscvic_1	2015-12-12	2015-12	December	2015	2015.75
1633	1633	2015-12-13	3.472	Paul Smith's College VIC	pscvic_1	2015-12-13	2015-12	December	2015	2015.75
1634	1634	2015-12-13 02:00:00	3.155	Paul Smith's College VIC	pscvic_1	2015-12-13	2015-12	December	2015	2015.75
1635	1635	2015-12-13 04:00:00	3.049	Paul Smith's College VIC	pscvic_1	2015-12-13	2015-12	December	2015	2015.75
1636	1636	2015-12-13 06:00:00	2.517	Paul Smith's College VIC	pscvic_1	2015-12-13	2015-12	December	2015	2015.75
1637	1637	2015-12-13 08:00:00	1.112	Paul Smith's College VIC	pscvic_1	2015-12-13	2015-12	December	2015	2015.75
1638	1638	2015-12-13 10:00:00	0.893	Paul Smith's College VIC	pscvic_1	2015-12-13	2015-12	December	2015	2015.75
1639	1639	2015-12-13	3.472	Paul Smith's College VIC	pscvic_1	2015-12-13	2015-12	December	2015	2015.75
1640	1640	2015-12-13 02:00:00	6.471	Paul Smith's College VIC	pscvic_1	2015-12-13	2015-12	December	2015	2015.75
1641	1641	2015-12-13 04:00:00	4.727	Paul Smith's College VIC	pscvic_1	2015-12-13	2015-12	December	2015	2015.75
1642	1642	2015-12-13 06:00:00	2.624	Paul Smith's College VIC	pscvic_1	2015-12-13	2015-12	December	2015	2015.75
1643	1643	2015-12-13 08:00:00	1.764	Paul Smith's College VIC	pscvic_1	2015-12-13	2015-12	December	2015	2015.75
1644	1644	2015-12-13 10:00:00	1.548	Paul Smith's College VIC	pscvic_1	2015-12-13	2015-12	December	2015	2015.75
1645	1645	2015-12-14	2.195	Paul Smith's College VIC	pscvic_1	2015-12-14	2015-12	December	2015	2015.75
1646	1646	2015-12-14 02:00:00	4.415	Paul Smith's College VIC	pscvic_1	2015-12-14	2015-12	December	2015	2015.75
1647	1647	2015-12-14 04:00:00	8.581	Paul Smith's College VIC	pscvic_1	2015-12-14	2015-12	December	2015	2015.75
1648	1648	2015-12-14 06:00:00	7.782	Paul Smith's College VIC	pscvic_1	2015-12-14	2015-12	December	2015	2015.75
1649	1649	2015-12-14 08:00:00	8.978	Paul Smith's College VIC	pscvic_1	2015-12-14	2015-12	December	2015	2015.75
1650	1650	2015-12-14 10:00:00	9.965	Paul Smith's College VIC	pscvic_1	2015-12-14	2015-12	December	2015	2015.75
1651	1651	2015-12-14	11.431	Paul Smith's College VIC	pscvic_1	2015-12-14	2015-12	December	2015	2015.75
1652	1652	2015-12-14 02:00:00	12.497	Paul Smith's College VIC	pscvic_1	2015-12-14	2015-12	December	2015	2015.75
1653	1653	2015-12-14 04:00:00	10.944	Paul Smith's College VIC	pscvic_1	2015-12-14	2015-12	December	2015	2015.75
1654	1654	2015-12-14 06:00:00	6.37	Paul Smith's College VIC	pscvic_1	2015-12-14	2015-12	December	2015	2015.75
1655	1655	2015-12-14 08:00:00	6.775	Paul Smith's College VIC	pscvic_1	2015-12-14	2015-12	December	2015	2015.75
1656	1656	2015-12-14 10:00:00	9.077	Paul Smith's College VIC	pscvic_1	2015-12-14	2015-12	December	2015	2015.75
1657	1657	2015-12-15	9.472	Paul Smith's College VIC	pscvic_1	2015-12-15	2015-12	December	2015	2015.75
1658	1658	2015-12-15 02:00:00	9.077	Paul Smith's College VIC	pscvic_1	2015-12-15	2015-12	December	2015	2015.75
1659	1659	2015-12-15 04:00:00	7.882	Paul Smith's College VIC	pscvic_1	2015-12-15	2015-12	December	2015	2015.75
1660	1660	2015-12-15 06:00:00	7.28	Paul Smith's College VIC	pscvic_1	2015-12-15	2015-12	December	2015	2015.75
1661	1661	2015-12-15 08:00:00	6.37	Paul Smith's College VIC	pscvic_1	2015-12-15	2015-12	December	2015	2015.75
1662	1662	2015-12-15 10:00:00	5.655	Paul Smith's College VIC	pscvic_1	2015-12-15	2015-12	December	2015	2015.75
1663	1663	2015-12-15	5.962	Paul Smith's College VIC	pscvic_1	2015-12-15	2015-12	December	2015	2015.75
1664	1664	2015-12-15 02:00:00	6.674	Paul Smith's College VIC	pscvic_1	2015-12-15	2015-12	December	2015	2015.75
1665	1665	2015-12-15 04:00:00	3.472	Paul Smith's College VIC	pscvic_1	2015-12-15	2015-12	December	2015	2015.75
1666	1666	2015-12-15 06:00:00	1.112	Paul Smith's College VIC	pscvic_1	2015-12-15	2015-12	December	2015	2015.75
1667	1667	2015-12-15 08:00:00	0.343	Paul Smith's College VIC	pscvic_1	2015-12-15	2015-12	December	2015	2015.75
1668	1668	2015-12-15 10:00:00	-0.102	Paul Smith's College VIC	pscvic_1	2015-12-15	2015-12	December	2015	2015.75
1669	1669	2015-12-16	-0.437	Paul Smith's College VIC	pscvic_1	2015-12-16	2015-12	December	2015	2015.75
1670	1670	2015-12-16 02:00:00	-0.774	Paul Smith's College VIC	pscvic_1	2015-12-16	2015-12	December	2015	2015.75
1671	1671	2015-12-16 04:00:00	-1.114	Paul Smith's College VIC	pscvic_1	2015-12-16	2015-12	December	2015	2015.75
1672	1672	2015-12-16 06:00:00	-1.57	Paul Smith's College VIC	pscvic_1	2015-12-16	2015-12	December	2015	2015.75
1673	1673	2015-12-16 08:00:00	-1.456	Paul Smith's College VIC	pscvic_1	2015-12-16	2015-12	December	2015	2015.75
1674	1674	2015-12-16 10:00:00	0.121	Paul Smith's College VIC	pscvic_1	2015-12-16	2015-12	December	2015	2015.75
1675	1675	2015-12-16	0.784	Paul Smith's College VIC	pscvic_1	2015-12-16	2015-12	December	2015	2015.75
1676	1676	2015-12-16 02:00:00	0.784	Paul Smith's College VIC	pscvic_1	2015-12-16	2015-12	December	2015	2015.75
1677	1677	2015-12-16 04:00:00	0.121	Paul Smith's College VIC	pscvic_1	2015-12-16	2015-12	December	2015	2015.75
1678	1678	2015-12-16 06:00:00	-1.001	Paul Smith's College VIC	pscvic_1	2015-12-16	2015-12	December	2015	2015.75
1679	1679	2015-12-16 08:00:00	-0.887	Paul Smith's College VIC	pscvic_1	2015-12-16	2015-12	December	2015	2015.75
1680	1680	2015-12-16 10:00:00	-1.57	Paul Smith's College VIC	pscvic_1	2015-12-16	2015-12	December	2015	2015.75
1681	1681	2015-12-17	-2.261	Paul Smith's College VIC	pscvic_1	2015-12-17	2015-12	December	2015	2015.75
1682	1682	2015-12-17 02:00:00	0.563	Paul Smith's College VIC	pscvic_1	2015-12-17	2015-12	December	2015	2015.75
1683	1683	2015-12-17 04:00:00	1.439	Paul Smith's College VIC	pscvic_1	2015-12-17	2015-12	December	2015	2015.75
1684	1684	2015-12-17 06:00:00	2.303	Paul Smith's College VIC	pscvic_1	2015-12-17	2015-12	December	2015	2015.75
1685	1685	2015-12-17 08:00:00	2.517	Paul Smith's College VIC	pscvic_1	2015-12-17	2015-12	December	2015	2015.75
1686	1686	2015-12-17 10:00:00	4.415	Paul Smith's College VIC	pscvic_1	2015-12-17	2015-12	December	2015	2015.75
1687	1687	2015-12-17	8.382	Paul Smith's College VIC	pscvic_1	2015-12-17	2015-12	December	2015	2015.75
1688	1688	2015-12-17 02:00:00	6.877	Paul Smith's College VIC	pscvic_1	2015-12-17	2015-12	December	2015	2015.75
1689	1689	2015-12-17 04:00:00	6.37	Paul Smith's College VIC	pscvic_1	2015-12-17	2015-12	December	2015	2015.75
1690	1690	2015-12-17 06:00:00	6.775	Paul Smith's College VIC	pscvic_1	2015-12-17	2015-12	December	2015	2015.75
1691	1691	2015-12-17 08:00:00	7.179	Paul Smith's College VIC	pscvic_1	2015-12-17	2015-12	December	2015	2015.75
1692	1692	2015-12-17 10:00:00	7.481	Paul Smith's College VIC	pscvic_1	2015-12-17	2015-12	December	2015	2015.75
1693	1693	2015-12-18	5.655	Paul Smith's College VIC	pscvic_1	2015-12-18	2015-12	December	2015	2015.75
1694	1694	2015-12-18 02:00:00	2.195	Paul Smith's College VIC	pscvic_1	2015-12-18	2015-12	December	2015	2015.75
1695	1695	2015-12-18 04:00:00	0.893	Paul Smith's College VIC	pscvic_1	2015-12-18	2015-12	December	2015	2015.75
1696	1696	2015-12-18 06:00:00	0.232	Paul Smith's College VIC	pscvic_1	2015-12-18	2015-12	December	2015	2015.75
1697	1697	2015-12-18 08:00:00	-0.102	Paul Smith's College VIC	pscvic_1	2015-12-18	2015-12	December	2015	2015.75
1698	1698	2015-12-18 10:00:00	0.121	Paul Smith's College VIC	pscvic_1	2015-12-18	2015-12	December	2015	2015.75
1699	1699	2015-12-18	0.453	Paul Smith's College VIC	pscvic_1	2015-12-18	2015-12	December	2015	2015.75
1700	1700	2015-12-18 02:00:00	0.343	Paul Smith's College VIC	pscvic_1	2015-12-18	2015-12	December	2015	2015.75
1701	1701	2015-12-18 04:00:00	-0.213	Paul Smith's College VIC	pscvic_1	2015-12-18	2015-12	December	2015	2015.75
1702	1702	2015-12-18 06:00:00	-1.114	Paul Smith's College VIC	pscvic_1	2015-12-18	2015-12	December	2015	2015.75
1703	1703	2015-12-18 08:00:00	-1.456	Paul Smith's College VIC	pscvic_1	2015-12-18	2015-12	December	2015	2015.75
1704	1704	2015-12-18 10:00:00	-1.914	Paul Smith's College VIC	pscvic_1	2015-12-18	2015-12	December	2015	2015.75
1705	1705	2015-12-19	-3.197	Paul Smith's College VIC	pscvic_1	2015-12-19	2015-12	December	2015	2015.75
1706	1706	2015-12-19 02:00:00	-3.434	Paul Smith's College VIC	pscvic_1	2015-12-19	2015-12	December	2015	2015.75
1707	1707	2015-12-19 04:00:00	-4.393	Paul Smith's College VIC	pscvic_1	2015-12-19	2015-12	December	2015	2015.75
1708	1708	2015-12-19 06:00:00	-3.911	Paul Smith's College VIC	pscvic_1	2015-12-19	2015-12	December	2015	2015.75
1709	1709	2015-12-19 08:00:00	-4.758	Paul Smith's College VIC	pscvic_1	2015-12-19	2015-12	December	2015	2015.75
1710	1710	2015-12-19 10:00:00	-3.911	Paul Smith's College VIC	pscvic_1	2015-12-19	2015-12	December	2015	2015.75
1711	1711	2015-12-19	-2.261	Paul Smith's College VIC	pscvic_1	2015-12-19	2015-12	December	2015	2015.75
1712	1712	2015-12-19 02:00:00	-2.377	Paul Smith's College VIC	pscvic_1	2015-12-19	2015-12	December	2015	2015.75
1713	1713	2015-12-19 04:00:00	-3.197	Paul Smith's College VIC	pscvic_1	2015-12-19	2015-12	December	2015	2015.75
1714	1714	2015-12-19 06:00:00	-4.152	Paul Smith's College VIC	pscvic_1	2015-12-19	2015-12	December	2015	2015.75
1715	1715	2015-12-19 08:00:00	-4.152	Paul Smith's College VIC	pscvic_1	2015-12-19	2015-12	December	2015	2015.75
1716	1716	2015-12-19 10:00:00	-5.125	Paul Smith's College VIC	pscvic_1	2015-12-19	2015-12	December	2015	2015.75
1717	1717	2015-12-20	-5.003	Paul Smith's College VIC	pscvic_1	2015-12-20	2015-12	December	2015	2015.75
1718	1718	2015-12-20 02:00:00	-5.372	Paul Smith's College VIC	pscvic_1	2015-12-20	2015-12	December	2015	2015.75
1719	1719	2015-12-20 04:00:00	-5.995	Paul Smith's College VIC	pscvic_1	2015-12-20	2015-12	December	2015	2015.75
1720	1720	2015-12-20 06:00:00	-7.267	Paul Smith's College VIC	pscvic_1	2015-12-20	2015-12	December	2015	2015.75
1721	1721	2015-12-20 08:00:00	-7.397	Paul Smith's College VIC	pscvic_1	2015-12-20	2015-12	December	2015	2015.75
1722	1722	2015-12-20 10:00:00	-6.626	Paul Smith's College VIC	pscvic_1	2015-12-20	2015-12	December	2015	2015.75
1723	1723	2015-12-20	-2.844	Paul Smith's College VIC	pscvic_1	2015-12-20	2015-12	December	2015	2015.75
1724	1724	2015-12-20 02:00:00	-1.914	Paul Smith's College VIC	pscvic_1	2015-12-20	2015-12	December	2015	2015.75
1725	1725	2015-12-20 04:00:00	-3.079	Paul Smith's College VIC	pscvic_1	2015-12-20	2015-12	December	2015	2015.75
1726	1726	2015-12-20 06:00:00	-6.373	Paul Smith's College VIC	pscvic_1	2015-12-20	2015-12	December	2015	2015.75
1727	1727	2015-12-20 08:00:00	-3.553	Paul Smith's College VIC	pscvic_1	2015-12-20	2015-12	December	2015	2015.75
1728	1728	2015-12-20 10:00:00	-3.911	Paul Smith's College VIC	pscvic_1	2015-12-20	2015-12	December	2015	2015.75
1729	1729	2015-12-21	-3.911	Paul Smith's College VIC	pscvic_1	2015-12-21	2015-12	December	2015	2015.75
1730	1730	2015-12-21 02:00:00	-2.494	Paul Smith's College VIC	pscvic_1	2015-12-21	2015-12	December	2015	2015.75
1731	1731	2015-12-21 04:00:00	-2.61	Paul Smith's College VIC	pscvic_1	2015-12-21	2015-12	December	2015	2015.75
1732	1732	2015-12-21 06:00:00	-1.914	Paul Smith's College VIC	pscvic_1	2015-12-21	2015-12	December	2015	2015.75
1733	1733	2015-12-21 08:00:00	-0.662	Paul Smith's College VIC	pscvic_1	2015-12-21	2015-12	December	2015	2015.75
1734	1734	2015-12-21 10:00:00	1.764	Paul Smith's College VIC	pscvic_1	2015-12-21	2015-12	December	2015	2015.75
1735	1735	2015-12-21	3.893	Paul Smith's College VIC	pscvic_1	2015-12-21	2015-12	December	2015	2015.75
1736	1736	2015-12-21 02:00:00	4.311	Paul Smith's College VIC	pscvic_1	2015-12-21	2015-12	December	2015	2015.75
1737	1737	2015-12-21 04:00:00	2.943	Paul Smith's College VIC	pscvic_1	2015-12-21	2015-12	December	2015	2015.75
1738	1738	2015-12-21 06:00:00	3.049	Paul Smith's College VIC	pscvic_1	2015-12-21	2015-12	December	2015	2015.75
1739	1739	2015-12-21 08:00:00	2.195	Paul Smith's College VIC	pscvic_1	2015-12-21	2015-12	December	2015	2015.75
1740	1740	2015-12-21 10:00:00	2.73	Paul Smith's College VIC	pscvic_1	2015-12-21	2015-12	December	2015	2015.75
1741	1741	2015-12-22	3.261	Paul Smith's College VIC	pscvic_1	2015-12-22	2015-12	December	2015	2015.75
1742	1742	2015-12-22 02:00:00	2.943	Paul Smith's College VIC	pscvic_1	2015-12-22	2015-12	December	2015	2015.75
1743	1743	2015-12-22 04:00:00	2.837	Paul Smith's College VIC	pscvic_1	2015-12-22	2015-12	December	2015	2015.75
1744	1744	2015-12-22 06:00:00	3.998	Paul Smith's College VIC	pscvic_1	2015-12-22	2015-12	December	2015	2015.75
1745	1745	2015-12-22 08:00:00	1.548	Paul Smith's College VIC	pscvic_1	2015-12-22	2015-12	December	2015	2015.75
1746	1746	2015-12-22 10:00:00	2.303	Paul Smith's College VIC	pscvic_1	2015-12-22	2015-12	December	2015	2015.75
1747	1747	2015-12-22	3.683	Paul Smith's College VIC	pscvic_1	2015-12-22	2015-12	December	2015	2015.75
1748	1748	2015-12-22 02:00:00	6.166	Paul Smith's College VIC	pscvic_1	2015-12-22	2015-12	December	2015	2015.75
1749	1749	2015-12-22 04:00:00	6.37	Paul Smith's College VIC	pscvic_1	2015-12-22	2015-12	December	2015	2015.75
1750	1750	2015-12-22 06:00:00	7.481	Paul Smith's College VIC	pscvic_1	2015-12-22	2015-12	December	2015	2015.75
1751	1751	2015-12-22 08:00:00	8.382	Paul Smith's College VIC	pscvic_1	2015-12-22	2015-12	December	2015	2015.75
1752	1752	2015-12-22 10:00:00	8.481	Paul Smith's College VIC	pscvic_1	2015-12-22	2015-12	December	2015	2015.75
1753	1753	2015-12-23	7.28	Paul Smith's College VIC	pscvic_1	2015-12-23	2015-12	December	2015	2015.75
1754	1754	2015-12-23 02:00:00	6.166	Paul Smith's College VIC	pscvic_1	2015-12-23	2015-12	December	2015	2015.75
1755	1755	2015-12-23 04:00:00	6.877	Paul Smith's College VIC	pscvic_1	2015-12-23	2015-12	December	2015	2015.75
1756	1756	2015-12-23 06:00:00	5.655	Paul Smith's College VIC	pscvic_1	2015-12-23	2015-12	December	2015	2015.75
1757	1757	2015-12-23 08:00:00	0.232	Paul Smith's College VIC	pscvic_1	2015-12-23	2015-12	December	2015	2015.75
1758	1758	2015-12-23 10:00:00	1.003	Paul Smith's College VIC	pscvic_1	2015-12-23	2015-12	December	2015	2015.75
1759	1759	2015-12-23	8.581	Paul Smith's College VIC	pscvic_1	2015-12-23	2015-12	December	2015	2015.75
1760	1760	2015-12-23 02:00:00	12.69	Paul Smith's College VIC	pscvic_1	2015-12-23	2015-12	December	2015	2015.75
1761	1761	2015-12-23 04:00:00	11.916	Paul Smith's College VIC	pscvic_1	2015-12-23	2015-12	December	2015	2015.75
1762	1762	2015-12-23 06:00:00	10.748	Paul Smith's College VIC	pscvic_1	2015-12-23	2015-12	December	2015	2015.75
1763	1763	2015-12-23 08:00:00	11.431	Paul Smith's College VIC	pscvic_1	2015-12-23	2015-12	December	2015	2015.75
1764	1764	2015-12-23 10:00:00	11.819	Paul Smith's College VIC	pscvic_1	2015-12-23	2015-12	December	2015	2015.75
1765	1765	2015-12-24	11.528	Paul Smith's College VIC	pscvic_1	2015-12-24	2015-12	December	2015	2015.75
1766	1766	2015-12-24 02:00:00	9.669	Paul Smith's College VIC	pscvic_1	2015-12-24	2015-12	December	2015	2015.75
1767	1767	2015-12-24 04:00:00	12.013	Paul Smith's College VIC	pscvic_1	2015-12-24	2015-12	December	2015	2015.75
1768	1768	2015-12-24 06:00:00	12.11	Paul Smith's College VIC	pscvic_1	2015-12-24	2015-12	December	2015	2015.75
1769	1769	2015-12-24 08:00:00	10.944	Paul Smith's College VIC	pscvic_1	2015-12-24	2015-12	December	2015	2015.75
1770	1770	2015-12-24 10:00:00	13.942	Paul Smith's College VIC	pscvic_1	2015-12-24	2015-12	December	2015	2015.75
1771	1771	2015-12-24	17.57	Paul Smith's College VIC	pscvic_1	2015-12-24	2015-12	December	2015	2015.75
1772	1772	2015-12-24 02:00:00	13.846	Paul Smith's College VIC	pscvic_1	2015-12-24	2015-12	December	2015	2015.75
1773	1773	2015-12-24 04:00:00	13.365	Paul Smith's College VIC	pscvic_1	2015-12-24	2015-12	December	2015	2015.75
1774	1774	2015-12-24 06:00:00	8.879	Paul Smith's College VIC	pscvic_1	2015-12-24	2015-12	December	2015	2015.75
1775	1775	2015-12-24 08:00:00	6.775	Paul Smith's College VIC	pscvic_1	2015-12-24	2015-12	December	2015	2015.75
1776	1776	2015-12-24 10:00:00	5.037	Paul Smith's College VIC	pscvic_1	2015-12-24	2015-12	December	2015	2015.75
1777	1777	2015-12-25	4.102	Paul Smith's College VIC	pscvic_1	2015-12-25	2015-12	December	2015	2015.75
1778	1778	2015-12-25 02:00:00	-3.672	Paul Smith's College VIC	pscvic_1	2015-12-25	2015-12	December	2015	2015.75
1779	1779	2015-12-25 04:00:00	-5.745	Paul Smith's College VIC	pscvic_1	2015-12-25	2015-12	December	2015	2015.75
1780	1780	2015-12-25 06:00:00	-5.62	Paul Smith's College VIC	pscvic_1	2015-12-25	2015-12	December	2015	2015.75
1781	1781	2015-12-25 08:00:00	-2.145	Paul Smith's College VIC	pscvic_1	2015-12-25	2015-12	December	2015	2015.75
1782	1782	2015-12-25 10:00:00	2.73	Paul Smith's College VIC	pscvic_1	2015-12-25	2015-12	December	2015	2015.75
1783	1783	2015-12-25	6.573	Paul Smith's College VIC	pscvic_1	2015-12-25	2015-12	December	2015	2015.75
1784	1784	2015-12-25 02:00:00	5.757	Paul Smith's College VIC	pscvic_1	2015-12-25	2015-12	December	2015	2015.75
1785	1785	2015-12-25 04:00:00	5.86	Paul Smith's College VIC	pscvic_1	2015-12-25	2015-12	December	2015	2015.75
1786	1786	2015-12-25 06:00:00	3.578	Paul Smith's College VIC	pscvic_1	2015-12-25	2015-12	December	2015	2015.75
1787	1787	2015-12-25 08:00:00	2.943	Paul Smith's College VIC	pscvic_1	2015-12-25	2015-12	December	2015	2015.75
1788	1788	2015-12-25 10:00:00	1.439	Paul Smith's College VIC	pscvic_1	2015-12-25	2015-12	December	2015	2015.75
1789	1789	2015-12-26	-1.228	Paul Smith's College VIC	pscvic_1	2015-12-26	2015-12	December	2015	2015.75
1790	1790	2015-12-26 02:00:00	-2.494	Paul Smith's College VIC	pscvic_1	2015-12-26	2015-12	December	2015	2015.75
1791	1791	2015-12-26 04:00:00	-0.662	Paul Smith's College VIC	pscvic_1	2015-12-26	2015-12	December	2015	2015.75
1792	1792	2015-12-26 06:00:00	-0.774	Paul Smith's College VIC	pscvic_1	2015-12-26	2015-12	December	2015	2015.75
1793	1793	2015-12-26 08:00:00	-7.397	Paul Smith's College VIC	pscvic_1	2015-12-26	2015-12	December	2015	2015.75
1794	1794	2015-12-26 10:00:00	-5.249	Paul Smith's College VIC	pscvic_1	2015-12-26	2015-12	December	2015	2015.75
1795	1795	2015-12-26	5.552	Paul Smith's College VIC	pscvic_1	2015-12-26	2015-12	December	2015	2015.75
1796	1796	2015-12-26 02:00:00	6.37	Paul Smith's College VIC	pscvic_1	2015-12-26	2015-12	December	2015	2015.75
1797	1797	2015-12-26 04:00:00	4.207	Paul Smith's College VIC	pscvic_1	2015-12-26	2015-12	December	2015	2015.75
1798	1798	2015-12-26 06:00:00	-1.799	Paul Smith's College VIC	pscvic_1	2015-12-26	2015-12	December	2015	2015.75
1799	1799	2015-12-26 08:00:00	-0.437	Paul Smith's College VIC	pscvic_1	2015-12-26	2015-12	December	2015	2015.75
1800	1800	2015-12-26 10:00:00	0.232	Paul Smith's College VIC	pscvic_1	2015-12-26	2015-12	December	2015	2015.75
1801	1801	2015-12-27	0.121	Paul Smith's College VIC	pscvic_1	2015-12-27	2015-12	December	2015	2015.75
1802	1802	2015-12-27 02:00:00	-0.437	Paul Smith's College VIC	pscvic_1	2015-12-27	2015-12	December	2015	2015.75
1803	1803	2015-12-27 04:00:00	0.232	Paul Smith's College VIC	pscvic_1	2015-12-27	2015-12	December	2015	2015.75
1804	1804	2015-12-27 06:00:00	0.232	Paul Smith's College VIC	pscvic_1	2015-12-27	2015-12	December	2015	2015.75
1805	1805	2015-12-27 08:00:00	1.33	Paul Smith's College VIC	pscvic_1	2015-12-27	2015-12	December	2015	2015.75
1806	1806	2015-12-27 10:00:00	2.41	Paul Smith's College VIC	pscvic_1	2015-12-27	2015-12	December	2015	2015.75
1807	1807	2015-12-27	3.155	Paul Smith's College VIC	pscvic_1	2015-12-27	2015-12	December	2015	2015.75
1808	1808	2015-12-27 02:00:00	2.303	Paul Smith's College VIC	pscvic_1	2015-12-27	2015-12	December	2015	2015.75
1809	1809	2015-12-27 04:00:00	-1.456	Paul Smith's College VIC	pscvic_1	2015-12-27	2015-12	December	2015	2015.75
1810	1810	2015-12-27 06:00:00	-2.727	Paul Smith's College VIC	pscvic_1	2015-12-27	2015-12	December	2015	2015.75
1811	1811	2015-12-27 08:00:00	-2.494	Paul Smith's College VIC	pscvic_1	2015-12-27	2015-12	December	2015	2015.75
1812	1812	2015-12-27 10:00:00	-3.434	Paul Smith's College VIC	pscvic_1	2015-12-27	2015-12	December	2015	2015.75
1813	1813	2015-12-28	-4.514	Paul Smith's College VIC	pscvic_1	2015-12-28	2015-12	December	2015	2015.75
1814	1814	2015-12-28 02:00:00	-5.496	Paul Smith's College VIC	pscvic_1	2015-12-28	2015-12	December	2015	2015.75
1815	1815	2015-12-28 04:00:00	-6.626	Paul Smith's College VIC	pscvic_1	2015-12-28	2015-12	December	2015	2015.75
1816	1816	2015-12-28 06:00:00	-8.447	Paul Smith's College VIC	pscvic_1	2015-12-28	2015-12	December	2015	2015.75
1817	1817	2015-12-28 08:00:00	-9.388	Paul Smith's College VIC	pscvic_1	2015-12-28	2015-12	December	2015	2015.75
1818	1818	2015-12-28 10:00:00	-8.847	Paul Smith's College VIC	pscvic_1	2015-12-28	2015-12	December	2015	2015.75
1819	1819	2015-12-28	-7.138	Paul Smith's College VIC	pscvic_1	2015-12-28	2015-12	December	2015	2015.75
1820	1820	2015-12-28 02:00:00	-5.995	Paul Smith's College VIC	pscvic_1	2015-12-28	2015-12	December	2015	2015.75
1821	1821	2015-12-28 04:00:00	-8.713	Paul Smith's College VIC	pscvic_1	2015-12-28	2015-12	December	2015	2015.75
1822	1822	2015-12-28 06:00:00	-10.493	Paul Smith's College VIC	pscvic_1	2015-12-28	2015-12	December	2015	2015.75
1823	1823	2015-12-28 08:00:00	-10.774	Paul Smith's College VIC	pscvic_1	2015-12-28	2015-12	December	2015	2015.75
1824	1824	2015-12-28 10:00:00	-10.214	Paul Smith's College VIC	pscvic_1	2015-12-28	2015-12	December	2015	2015.75
1825	1825	2015-12-29	-10.214	Paul Smith's College VIC	pscvic_1	2015-12-29	2015-12	December	2015	2015.75
1826	1826	2015-12-29 02:00:00	-10.493	Paul Smith's College VIC	pscvic_1	2015-12-29	2015-12	December	2015	2015.75
1827	1827	2015-12-29 04:00:00	-10.075	Paul Smith's College VIC	pscvic_1	2015-12-29	2015-12	December	2015	2015.75
1828	1828	2015-12-29 06:00:00	-8.982	Paul Smith's College VIC	pscvic_1	2015-12-29	2015-12	December	2015	2015.75
1829	1829	2015-12-29 08:00:00	-7.527	Paul Smith's College VIC	pscvic_1	2015-12-29	2015-12	December	2015	2015.75
1830	1830	2015-12-29 10:00:00	-5.87	Paul Smith's College VIC	pscvic_1	2015-12-29	2015-12	December	2015	2015.75
1831	1831	2015-12-29	-1.684	Paul Smith's College VIC	pscvic_1	2015-12-29	2015-12	December	2015	2015.75
1832	1832	2015-12-29 02:00:00	0.121	Paul Smith's College VIC	pscvic_1	2015-12-29	2015-12	December	2015	2015.75
1833	1833	2015-12-29 04:00:00	0.453	Paul Smith's College VIC	pscvic_1	2015-12-29	2015-12	December	2015	2015.75
1834	1834	2015-12-29 06:00:00	0.121	Paul Smith's College VIC	pscvic_1	2015-12-29	2015-12	December	2015	2015.75
1835	1835	2015-12-29 08:00:00	0.121	Paul Smith's College VIC	pscvic_1	2015-12-29	2015-12	December	2015	2015.75
1836	1836	2015-12-29 10:00:00	0.121	Paul Smith's College VIC	pscvic_1	2015-12-29	2015-12	December	2015	2015.75
1837	1837	2015-12-30	0.121	Paul Smith's College VIC	pscvic_1	2015-12-30	2015-12	December	2015	2015.75
1838	1838	2015-12-30 02:00:00	0.121	Paul Smith's College VIC	pscvic_1	2015-12-30	2015-12	December	2015	2015.75
1839	1839	2015-12-30 04:00:00	0.232	Paul Smith's College VIC	pscvic_1	2015-12-30	2015-12	December	2015	2015.75
1840	1840	2015-12-30 06:00:00	0.232	Paul Smith's College VIC	pscvic_1	2015-12-30	2015-12	December	2015	2015.75
1841	1841	2015-12-30 08:00:00	0.121	Paul Smith's College VIC	pscvic_1	2015-12-30	2015-12	December	2015	2015.75
1842	1842	2015-12-30 10:00:00	0.893	Paul Smith's College VIC	pscvic_1	2015-12-30	2015-12	December	2015	2015.75
1843	1843	2015-12-30	3.683	Paul Smith's College VIC	pscvic_1	2015-12-30	2015-12	December	2015	2015.75
1844	1844	2015-12-30 02:00:00	3.155	Paul Smith's College VIC	pscvic_1	2015-12-30	2015-12	December	2015	2015.75
1845	1845	2015-12-30 04:00:00	2.943	Paul Smith's College VIC	pscvic_1	2015-12-30	2015-12	December	2015	2015.75
1846	1846	2015-12-30 06:00:00	0.453	Paul Smith's College VIC	pscvic_1	2015-12-30	2015-12	December	2015	2015.75
1847	1847	2015-12-30 08:00:00	0.232	Paul Smith's College VIC	pscvic_1	2015-12-30	2015-12	December	2015	2015.75
1848	1848	2015-12-30 10:00:00	0.121	Paul Smith's College VIC	pscvic_1	2015-12-30	2015-12	December	2015	2015.75
1849	1849	2015-12-31	0.343	Paul Smith's College VIC	pscvic_1	2015-12-31	2015-12	December	2015	2015.75
1850	1850	2015-12-31 02:00:00	0.674	Paul Smith's College VIC	pscvic_1	2015-12-31	2015-12	December	2015	2015.75
1851	1851	2015-12-31 04:00:00	0.121	Paul Smith's College VIC	pscvic_1	2015-12-31	2015-12	December	2015	2015.75
1852	1852	2015-12-31 06:00:00	0.01	Paul Smith's College VIC	pscvic_1	2015-12-31	2015-12	December	2015	2015.75
1853	1853	2015-12-31 08:00:00	-0.325	Paul Smith's College VIC	pscvic_1	2015-12-31	2015-12	December	2015	2015.75
1854	1854	2015-12-31 10:00:00	-0.213	Paul Smith's College VIC	pscvic_1	2015-12-31	2015-12	December	2015	2015.75
1855	1855	2015-12-31	0.01	Paul Smith's College VIC	pscvic_1	2015-12-31	2015-12	December	2015	2015.75
1856	1856	2015-12-31 02:00:00	0.01	Paul Smith's College VIC	pscvic_1	2015-12-31	2015-12	December	2015	2015.75
1857	1857	2015-12-31 04:00:00	-1.114	Paul Smith's College VIC	pscvic_1	2015-12-31	2015-12	December	2015	2015.75
1858	1858	2015-12-31 06:00:00	-2.377	Paul Smith's College VIC	pscvic_1	2015-12-31	2015-12	December	2015	2015.75
1859	1859	2015-12-31 08:00:00	-2.377	Paul Smith's College VIC	pscvic_1	2015-12-31	2015-12	December	2015	2015.75
1860	1860	2015-12-31 10:00:00	-2.727	Paul Smith's College VIC	pscvic_1	2015-12-31	2015-12	December	2015	2015.75
1861	1861	2016-01-01	-2.61	Paul Smith's College VIC	pscvic_1	2016-01-01	2016-01	January	2016	2016
1862	1862	2016-01-01 02:00:00	-2.494	Paul Smith's College VIC	pscvic_1	2016-01-01	2016-01	January	2016	2016
1863	1863	2016-01-01 04:00:00	-2.962	Paul Smith's College VIC	pscvic_1	2016-01-01	2016-01	January	2016	2016
1864	1864	2016-01-01 06:00:00	-3.553	Paul Smith's College VIC	pscvic_1	2016-01-01	2016-01	January	2016	2016
1865	1865	2016-01-01 08:00:00	-3.316	Paul Smith's College VIC	pscvic_1	2016-01-01	2016-01	January	2016	2016
1866	1866	2016-01-01 10:00:00	-3.079	Paul Smith's College VIC	pscvic_1	2016-01-01	2016-01	January	2016	2016
1867	1867	2016-01-01	-2.727	Paul Smith's College VIC	pscvic_1	2016-01-01	2016-01	January	2016	2016
1868	1868	2016-01-01 02:00:00	0.674	Paul Smith's College VIC	pscvic_1	2016-01-01	2016-01	January	2016	2016
1869	1869	2016-01-01 04:00:00	-1.914	Paul Smith's College VIC	pscvic_1	2016-01-01	2016-01	January	2016	2016
1870	1870	2016-01-01 06:00:00	-5.125	Paul Smith's College VIC	pscvic_1	2016-01-01	2016-01	January	2016	2016
1871	1871	2016-01-01 08:00:00	-5.372	Paul Smith's College VIC	pscvic_1	2016-01-01	2016-01	January	2016	2016
1872	1872	2016-01-01 10:00:00	-5.745	Paul Smith's College VIC	pscvic_1	2016-01-01	2016-01	January	2016	2016
1873	1873	2016-01-02	-5.87	Paul Smith's College VIC	pscvic_1	2016-01-02	2016-01	January	2016	2016
1874	1874	2016-01-02 02:00:00	-5.496	Paul Smith's College VIC	pscvic_1	2016-01-02	2016-01	January	2016	2016
1875	1875	2016-01-02 04:00:00	-5.125	Paul Smith's College VIC	pscvic_1	2016-01-02	2016-01	January	2016	2016
1876	1876	2016-01-02 06:00:00	-5.372	Paul Smith's College VIC	pscvic_1	2016-01-02	2016-01	January	2016	2016
1877	1877	2016-01-02 08:00:00	-5.496	Paul Smith's College VIC	pscvic_1	2016-01-02	2016-01	January	2016	2016
1878	1878	2016-01-02 10:00:00	-4.636	Paul Smith's College VIC	pscvic_1	2016-01-02	2016-01	January	2016	2016
1879	1879	2016-01-02	-3.553	Paul Smith's College VIC	pscvic_1	2016-01-02	2016-01	January	2016	2016
1880	1880	2016-01-02 02:00:00	-3.197	Paul Smith's College VIC	pscvic_1	2016-01-02	2016-01	January	2016	2016
1881	1881	2016-01-02 04:00:00	-3.672	Paul Smith's College VIC	pscvic_1	2016-01-02	2016-01	January	2016	2016
1882	1882	2016-01-02 06:00:00	-4.031	Paul Smith's College VIC	pscvic_1	2016-01-02	2016-01	January	2016	2016
1883	1883	2016-01-02 08:00:00	-3.672	Paul Smith's College VIC	pscvic_1	2016-01-02	2016-01	January	2016	2016
1884	1884	2016-01-02 10:00:00	-3.672	Paul Smith's College VIC	pscvic_1	2016-01-02	2016-01	January	2016	2016
1885	1885	2016-01-03	-3.197	Paul Smith's College VIC	pscvic_1	2016-01-03	2016-01	January	2016	2016
1886	1886	2016-01-03 02:00:00	-2.844	Paul Smith's College VIC	pscvic_1	2016-01-03	2016-01	January	2016	2016
1887	1887	2016-01-03 04:00:00	-3.197	Paul Smith's College VIC	pscvic_1	2016-01-03	2016-01	January	2016	2016
1888	1888	2016-01-03 06:00:00	-3.792	Paul Smith's College VIC	pscvic_1	2016-01-03	2016-01	January	2016	2016
1889	1889	2016-01-03 08:00:00	-3.553	Paul Smith's College VIC	pscvic_1	2016-01-03	2016-01	January	2016	2016
1890	1890	2016-01-03 10:00:00	-2.261	Paul Smith's College VIC	pscvic_1	2016-01-03	2016-01	January	2016	2016
1891	1891	2016-01-03	-1.341	Paul Smith's College VIC	pscvic_1	2016-01-03	2016-01	January	2016	2016
1892	1892	2016-01-03 02:00:00	-0.102	Paul Smith's College VIC	pscvic_1	2016-01-03	2016-01	January	2016	2016
1893	1893	2016-01-03 04:00:00	-1.57	Paul Smith's College VIC	pscvic_1	2016-01-03	2016-01	January	2016	2016
1894	1894	2016-01-03 06:00:00	-4.272	Paul Smith's College VIC	pscvic_1	2016-01-03	2016-01	January	2016	2016
1895	1895	2016-01-03 08:00:00	-7.657	Paul Smith's College VIC	pscvic_1	2016-01-03	2016-01	January	2016	2016
1896	1896	2016-01-03 10:00:00	-10.353	Paul Smith's College VIC	pscvic_1	2016-01-03	2016-01	January	2016	2016
1897	1897	2016-01-04	-12.214	Paul Smith's College VIC	pscvic_1	2016-01-04	2016-01	January	2016	2016
1898	1898	2016-01-04 02:00:00	-13.715	Paul Smith's College VIC	pscvic_1	2016-01-04	2016-01	January	2016	2016
1899	1899	2016-01-04 04:00:00	-16.264	Paul Smith's College VIC	pscvic_1	2016-01-04	2016-01	January	2016	2016
1900	1900	2016-01-04 06:00:00	-17.966	Paul Smith's College VIC	pscvic_1	2016-01-04	2016-01	January	2016	2016
1901	1901	2016-01-04 08:00:00	-19.035	Paul Smith's College VIC	pscvic_1	2016-01-04	2016-01	January	2016	2016
1902	1902	2016-01-04 10:00:00	-17.792	Paul Smith's College VIC	pscvic_1	2016-01-04	2016-01	January	2016	2016
1903	1903	2016-01-04	-11.776	Paul Smith's College VIC	pscvic_1	2016-01-04	2016-01	January	2016	2016
1904	1904	2016-01-04 02:00:00	-11.776	Paul Smith's College VIC	pscvic_1	2016-01-04	2016-01	January	2016	2016
1905	1905	2016-01-04 04:00:00	-16.43	Paul Smith's College VIC	pscvic_1	2016-01-04	2016-01	January	2016	2016
1906	1906	2016-01-04 06:00:00	-21.493	Paul Smith's College VIC	pscvic_1	2016-01-04	2016-01	January	2016	2016
1907	1907	2016-01-04 08:00:00	-24.406	Paul Smith's College VIC	pscvic_1	2016-01-04	2016-01	January	2016	2016
1908	1908	2016-01-04 10:00:00	-23.329	Paul Smith's College VIC	pscvic_1	2016-01-04	2016-01	January	2016	2016
1909	1909	2016-01-05	-20.907	Paul Smith's College VIC	pscvic_1	2016-01-05	2016-01	January	2016	2016
1910	1910	2016-01-05 02:00:00	-27.183	Paul Smith's College VIC	pscvic_1	2016-01-05	2016-01	January	2016	2016
1911	1911	2016-01-05 04:00:00	-31.735	Paul Smith's College VIC	pscvic_1	2016-01-05	2016-01	January	2016	2016
1912	1912	2016-01-05 06:00:00	-32.332	Paul Smith's College VIC	pscvic_1	2016-01-05	2016-01	January	2016	2016
1913	1913	2016-01-05 08:00:00	-32.944	Paul Smith's College VIC	pscvic_1	2016-01-05	2016-01	January	2016	2016
1914	1914	2016-01-05 10:00:00	-27.183	Paul Smith's College VIC	pscvic_1	2016-01-05	2016-01	January	2016	2016
1915	1915	2016-01-05	-7.787	Paul Smith's College VIC	pscvic_1	2016-01-05	2016-01	January	2016	2016
1916	1916	2016-01-05 02:00:00	-3.672	Paul Smith's College VIC	pscvic_1	2016-01-05	2016-01	January	2016	2016
1917	1917	2016-01-05 04:00:00	-4.88	Paul Smith's College VIC	pscvic_1	2016-01-05	2016-01	January	2016	2016
1918	1918	2016-01-05 06:00:00	-15.446	Paul Smith's College VIC	pscvic_1	2016-01-05	2016-01	January	2016	2016
1919	1919	2016-01-05 08:00:00	-14.334	Paul Smith's College VIC	pscvic_1	2016-01-05	2016-01	January	2016	2016
1920	1920	2016-01-05 10:00:00	-13.107	Paul Smith's College VIC	pscvic_1	2016-01-05	2016-01	January	2016	2016
1921	1921	2016-01-06	-12.807	Paul Smith's College VIC	pscvic_1	2016-01-06	2016-01	January	2016	2016
1922	1922	2016-01-06 02:00:00	-12.068	Paul Smith's College VIC	pscvic_1	2016-01-06	2016-01	January	2016	2016
1923	1923	2016-01-06 04:00:00	-14.806	Paul Smith's College VIC	pscvic_1	2016-01-06	2016-01	January	2016	2016
1924	1924	2016-01-06 06:00:00	-15.124	Paul Smith's College VIC	pscvic_1	2016-01-06	2016-01	January	2016	2016
1925	1925	2016-01-06 08:00:00	-19.584	Paul Smith's College VIC	pscvic_1	2016-01-06	2016-01	January	2016	2016
1926	1926	2016-01-06 10:00:00	-14.806	Paul Smith's College VIC	pscvic_1	2016-01-06	2016-01	January	2016	2016
1927	1927	2016-01-06	3.472	Paul Smith's College VIC	pscvic_1	2016-01-06	2016-01	January	2016	2016
1928	1928	2016-01-06 02:00:00	6.268	Paul Smith's College VIC	pscvic_1	2016-01-06	2016-01	January	2016	2016
1929	1929	2016-01-06 04:00:00	3.261	Paul Smith's College VIC	pscvic_1	2016-01-06	2016-01	January	2016	2016
1930	1930	2016-01-06 06:00:00	-7.918	Paul Smith's College VIC	pscvic_1	2016-01-06	2016-01	January	2016	2016
1931	1931	2016-01-06 08:00:00	-7.657	Paul Smith's College VIC	pscvic_1	2016-01-06	2016-01	January	2016	2016
1932	1932	2016-01-06 10:00:00	-14.965	Paul Smith's College VIC	pscvic_1	2016-01-06	2016-01	January	2016	2016
1933	1933	2016-01-07	-15.446	Paul Smith's College VIC	pscvic_1	2016-01-07	2016-01	January	2016	2016
1934	1934	2016-01-07 02:00:00	-17.966	Paul Smith's College VIC	pscvic_1	2016-01-07	2016-01	January	2016	2016
1935	1935	2016-01-07 04:00:00	-20.523	Paul Smith's College VIC	pscvic_1	2016-01-07	2016-01	January	2016	2016
1936	1936	2016-01-07 06:00:00	-20.333	Paul Smith's College VIC	pscvic_1	2016-01-07	2016-01	January	2016	2016
1937	1937	2016-01-07 08:00:00	-18.142	Paul Smith's College VIC	pscvic_1	2016-01-07	2016-01	January	2016	2016
1938	1938	2016-01-07 10:00:00	-13.409	Paul Smith's College VIC	pscvic_1	2016-01-07	2016-01	January	2016	2016
1939	1939	2016-01-07	5.347	Paul Smith's College VIC	pscvic_1	2016-01-07	2016-01	January	2016	2016
1940	1940	2016-01-07 02:00:00	10.455	Paul Smith's College VIC	pscvic_1	2016-01-07	2016-01	January	2016	2016
1941	1941	2016-01-07 04:00:00	2.943	Paul Smith's College VIC	pscvic_1	2016-01-07	2016-01	January	2016	2016
1942	1942	2016-01-07 06:00:00	-8.713	Paul Smith's College VIC	pscvic_1	2016-01-07	2016-01	January	2016	2016
1943	1943	2016-01-07 08:00:00	-10.493	Paul Smith's College VIC	pscvic_1	2016-01-07	2016-01	January	2016	2016
1944	1944	2016-01-07 10:00:00	-15.446	Paul Smith's College VIC	pscvic_1	2016-01-07	2016-01	January	2016	2016
1945	1945	2016-01-08	-18.142	Paul Smith's College VIC	pscvic_1	2016-01-08	2016-01	January	2016	2016
1946	1946	2016-01-08 02:00:00	-19.4	Paul Smith's College VIC	pscvic_1	2016-01-08	2016-01	January	2016	2016
1947	1947	2016-01-08 04:00:00	-19.77	Paul Smith's College VIC	pscvic_1	2016-01-08	2016-01	January	2016	2016
1948	1948	2016-01-08 06:00:00	-20.523	Paul Smith's College VIC	pscvic_1	2016-01-08	2016-01	January	2016	2016
1949	1949	2016-01-08 08:00:00	-20.714	Paul Smith's College VIC	pscvic_1	2016-01-08	2016-01	January	2016	2016
1950	1950	2016-01-08 10:00:00	-13.562	Paul Smith's College VIC	pscvic_1	2016-01-08	2016-01	January	2016	2016
1951	1951	2016-01-08	6.37	Paul Smith's College VIC	pscvic_1	2016-01-08	2016-01	January	2016	2016
1952	1952	2016-01-08 02:00:00	8.082	Paul Smith's College VIC	pscvic_1	2016-01-08	2016-01	January	2016	2016
1953	1953	2016-01-08 04:00:00	3.893	Paul Smith's College VIC	pscvic_1	2016-01-08	2016-01	January	2016	2016
1954	1954	2016-01-08 06:00:00	-5.745	Paul Smith's College VIC	pscvic_1	2016-01-08	2016-01	January	2016	2016
1955	1955	2016-01-08 08:00:00	-5.87	Paul Smith's College VIC	pscvic_1	2016-01-08	2016-01	January	2016	2016
1956	1956	2016-01-08 10:00:00	-7.787	Paul Smith's College VIC	pscvic_1	2016-01-08	2016-01	January	2016	2016
1957	1957	2016-01-09	-0.549	Paul Smith's College VIC	pscvic_1	2016-01-09	2016-01	January	2016	2016
1958	1958	2016-01-09 02:00:00	-4.393	Paul Smith's College VIC	pscvic_1	2016-01-09	2016-01	January	2016	2016
1959	1959	2016-01-09 04:00:00	0.01	Paul Smith's College VIC	pscvic_1	2016-01-09	2016-01	January	2016	2016
1960	1960	2016-01-09 06:00:00	-0.213	Paul Smith's College VIC	pscvic_1	2016-01-09	2016-01	January	2016	2016
1961	1961	2016-01-09 08:00:00	-0.549	Paul Smith's College VIC	pscvic_1	2016-01-09	2016-01	January	2016	2016
1962	1962	2016-01-09 10:00:00	2.195	Paul Smith's College VIC	pscvic_1	2016-01-09	2016-01	January	2016	2016
1963	1963	2016-01-09	6.268	Paul Smith's College VIC	pscvic_1	2016-01-09	2016-01	January	2016	2016
1964	1964	2016-01-09 02:00:00	5.552	Paul Smith's College VIC	pscvic_1	2016-01-09	2016-01	January	2016	2016
1965	1965	2016-01-09 04:00:00	5.552	Paul Smith's College VIC	pscvic_1	2016-01-09	2016-01	January	2016	2016
1966	1966	2016-01-09 06:00:00	1.872	Paul Smith's College VIC	pscvic_1	2016-01-09	2016-01	January	2016	2016
1967	1967	2016-01-09 08:00:00	2.303	Paul Smith's College VIC	pscvic_1	2016-01-09	2016-01	January	2016	2016
1968	1968	2016-01-09 10:00:00	2.303	Paul Smith's College VIC	pscvic_1	2016-01-09	2016-01	January	2016	2016
1969	1969	2016-01-10	2.624	Paul Smith's College VIC	pscvic_1	2016-01-10	2016-01	January	2016	2016
1970	1970	2016-01-10 02:00:00	0.563	Paul Smith's College VIC	pscvic_1	2016-01-10	2016-01	January	2016	2016
1971	1971	2016-01-10 04:00:00	0.563	Paul Smith's College VIC	pscvic_1	2016-01-10	2016-01	January	2016	2016
1972	1972	2016-01-10 06:00:00	0.893	Paul Smith's College VIC	pscvic_1	2016-01-10	2016-01	January	2016	2016
1973	1973	2016-01-10 08:00:00	3.893	Paul Smith's College VIC	pscvic_1	2016-01-10	2016-01	January	2016	2016
1974	1974	2016-01-10 10:00:00	1.33	Paul Smith's College VIC	pscvic_1	2016-01-10	2016-01	January	2016	2016
1975	1975	2016-01-10	5.037	Paul Smith's College VIC	pscvic_1	2016-01-10	2016-01	January	2016	2016
1976	1976	2016-01-10 02:00:00	7.28	Paul Smith's College VIC	pscvic_1	2016-01-10	2016-01	January	2016	2016
1977	1977	2016-01-10 04:00:00	8.481	Paul Smith's College VIC	pscvic_1	2016-01-10	2016-01	January	2016	2016
1978	1978	2016-01-10 06:00:00	5.141	Paul Smith's College VIC	pscvic_1	2016-01-10	2016-01	January	2016	2016
1979	1979	2016-01-10 08:00:00	4.831	Paul Smith's College VIC	pscvic_1	2016-01-10	2016-01	January	2016	2016
1980	1980	2016-01-10 10:00:00	0.232	Paul Smith's College VIC	pscvic_1	2016-01-10	2016-01	January	2016	2016
1981	1981	2016-01-11	-1.914	Paul Smith's College VIC	pscvic_1	2016-01-11	2016-01	January	2016	2016
1982	1982	2016-01-11 02:00:00	-3.911	Paul Smith's College VIC	pscvic_1	2016-01-11	2016-01	January	2016	2016
1983	1983	2016-01-11 04:00:00	-5.995	Paul Smith's College VIC	pscvic_1	2016-01-11	2016-01	January	2016	2016
1984	1984	2016-01-11 06:00:00	-6.882	Paul Smith's College VIC	pscvic_1	2016-01-11	2016-01	January	2016	2016
1985	1985	2016-01-11 08:00:00	-8.58	Paul Smith's College VIC	pscvic_1	2016-01-11	2016-01	January	2016	2016
1986	1986	2016-01-11 10:00:00	-7.918	Paul Smith's College VIC	pscvic_1	2016-01-11	2016-01	January	2016	2016
1987	1987	2016-01-11	-3.553	Paul Smith's College VIC	pscvic_1	2016-01-11	2016-01	January	2016	2016
1988	1988	2016-01-11 02:00:00	-3.079	Paul Smith's College VIC	pscvic_1	2016-01-11	2016-01	January	2016	2016
1989	1989	2016-01-11 04:00:00	-7.397	Paul Smith's College VIC	pscvic_1	2016-01-11	2016-01	January	2016	2016
1990	1990	2016-01-11 06:00:00	-10.916	Paul Smith's College VIC	pscvic_1	2016-01-11	2016-01	January	2016	2016
1991	1991	2016-01-11 08:00:00	-11.776	Paul Smith's College VIC	pscvic_1	2016-01-11	2016-01	January	2016	2016
1992	1992	2016-01-11 10:00:00	-17.966	Paul Smith's College VIC	pscvic_1	2016-01-11	2016-01	January	2016	2016
1993	1993	2016-01-12	-15.446	Paul Smith's College VIC	pscvic_1	2016-01-12	2016-01	January	2016	2016
1994	1994	2016-01-12 02:00:00	-12.214	Paul Smith's College VIC	pscvic_1	2016-01-12	2016-01	January	2016	2016
1995	1995	2016-01-12 04:00:00	-15.446	Paul Smith's College VIC	pscvic_1	2016-01-12	2016-01	January	2016	2016
1996	1996	2016-01-12 06:00:00	-13.715	Paul Smith's College VIC	pscvic_1	2016-01-12	2016-01	January	2016	2016
1997	1997	2016-01-12 08:00:00	-13.107	Paul Smith's College VIC	pscvic_1	2016-01-12	2016-01	January	2016	2016
1998	1998	2016-01-12 10:00:00	-8.847	Paul Smith's College VIC	pscvic_1	2016-01-12	2016-01	January	2016	2016
1999	1999	2016-01-12	-3.197	Paul Smith's College VIC	pscvic_1	2016-01-12	2016-01	January	2016	2016
[truncated: 134,888 more rows]

## Sheet: Data Headers Defined
Header	description
id	row identifier
obs	row identifier for individual location
date_time	Date time in format M/D/YYYY H:MM
tempc	temperature degrees Celcius
survey_site	name of peatland or peatland complex
obs_point	name of logger location within peatland complex
date	date without the time
Y_m	Year_Month
month	Month
year	Year
yq	Year_quarter (.00 = jan, feb, mar; .25 = apr, may, jun; etc)

## Sheet: Data Logger Locations
		NAD83 Z18
Survey site	Observation Point	utmx	utmy
Bloomingdale bog	bdale	568192	4914622
Brandreth South Fen	Brandrethsouth01	523591	4859210
Brandreth South Fen	Brandrethsouth02	523641	4859210
Ferds Bog	ferds	520271	4848454
GLSA BigBig	GLSAbig39	518686	4867457
GLSA BigBig	GLSAbig40	518542	4867510
GLSA Esker Fen	GLSAesker01	520790	4866401
GLSA Small Bog	GLSAsmall17	518282	4866238
GLSA Small Bog	GLSAsmall18	518236	4866258
Hoffman	Hoff	595588	4856451
Meacham	meach	555838	4932640
Osgood	osg	561650	4924818
Piercefield	pfield	530988	4898696
Paul Smith's college VIC	PSCVIC	558153	4921437
Silver lake bog	slb	588534	4929249
Spring Pond Bog	spb	539992	4912923
